# Supplementary material for: Mapping the contours of an emerging phase out science
Source: Research Square preprint supplement (doi:10.21203/rs.3.rs-1348121/v1), 2022-03-07
Supplement: Supplementary file 1 [file d6515da6d65b9315eb86253e.pdf]

## Supplementary Data C: Additional figures

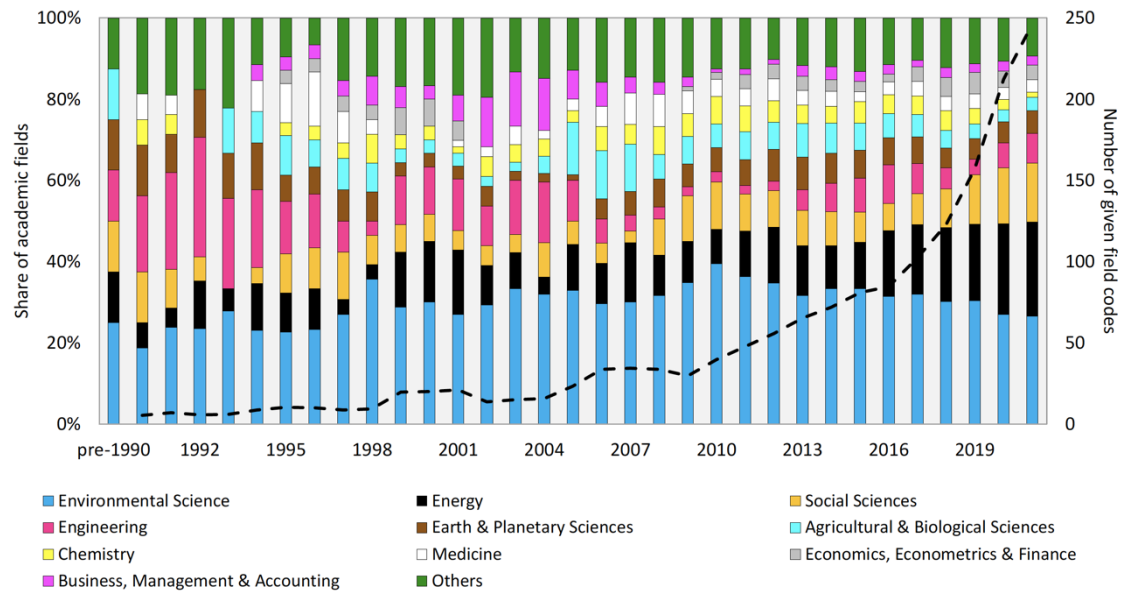

**Fig. 1 Share of academic fields contributing to phase-out literature**

This shows the annual share of academic field codes provided by Scopus for all publications ( $n=870$ ).

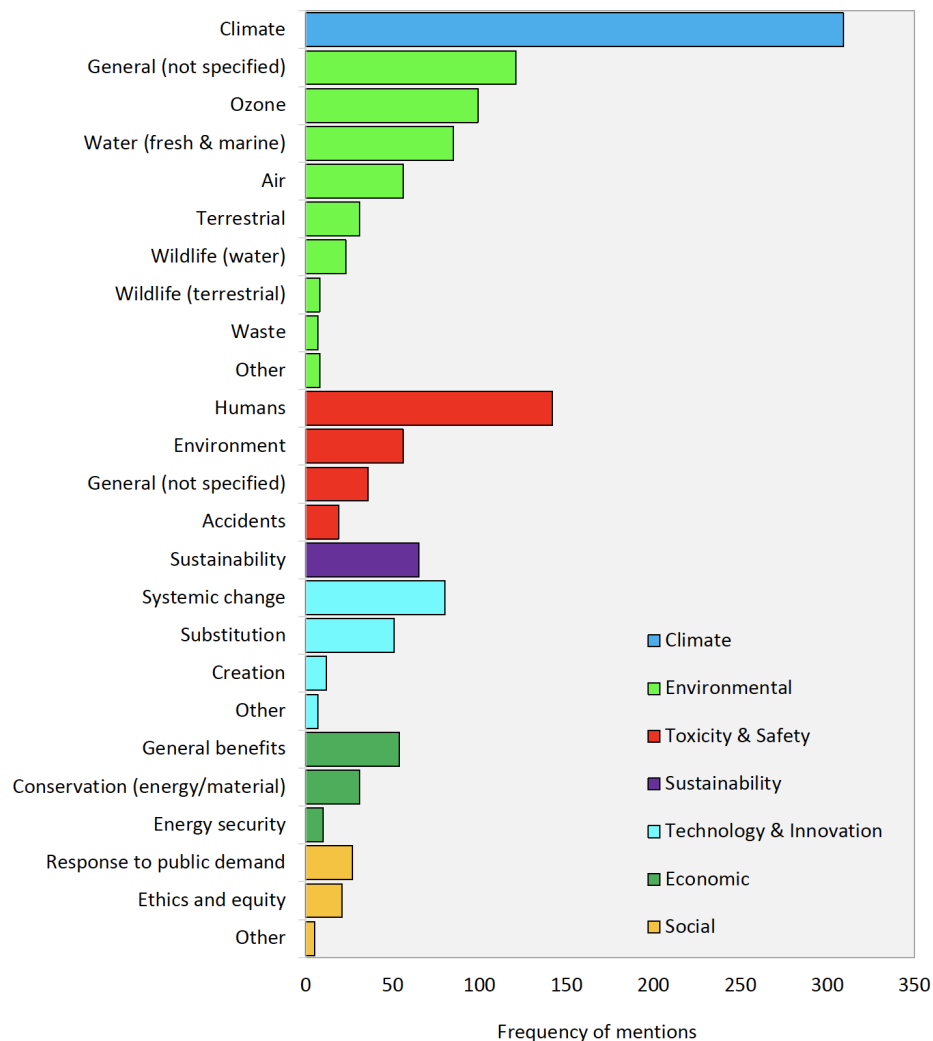

**Fig. 2 Breakdown of coding results for drivers of phase-outs (absolute values, n=747 papers)**

This shows the results of the sub-codes that captured the specific drivers that explain why the phase-out is implemented or discussed as an approach for advancing environmental sustainability goals. Papers citing multiple instruments received more than one code. Papers not citing any driver (n=123) are not shown. For more information on coding procedure refer to Supplemental Information Note 3.

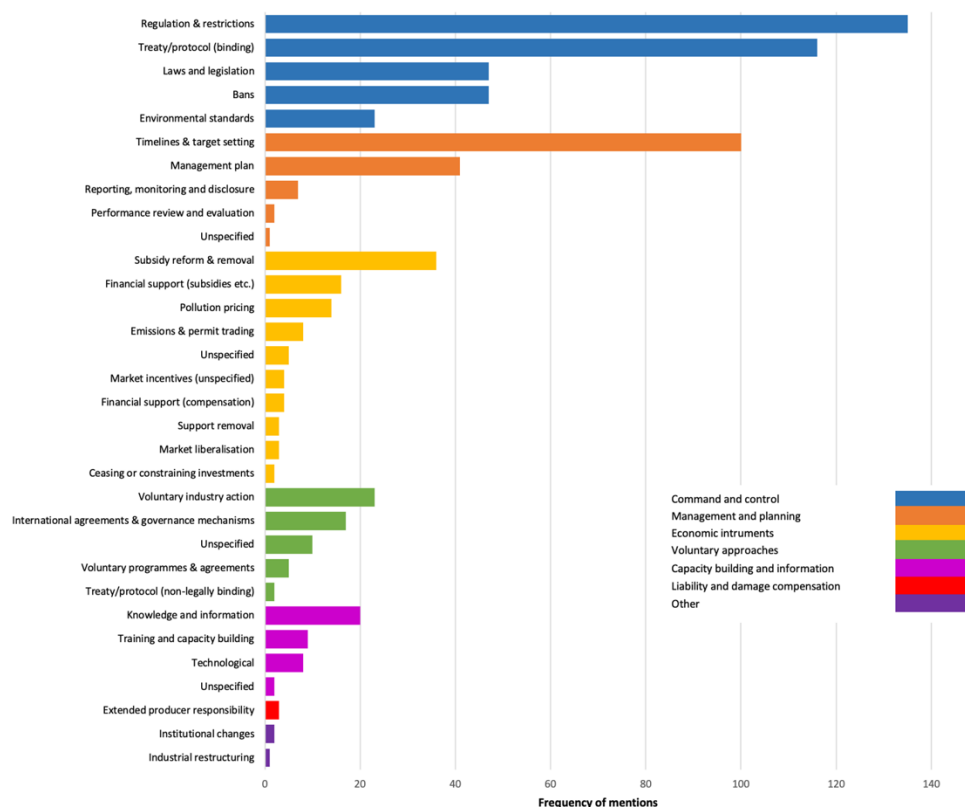

**Fig. 3 Breakdown of coding results for policy instruments underlying phase-outs (absolute values, n=443 papers)**

This shows the results of the sub-codes that captured the specific policy instruments described as inducing the phase-out or desirable for this purpose. Papers citing multiple instruments received more than one code. Papers not citing any policy (n=427) are not shown. For more information on coding procedure refer to Supplemental Information Note 3.

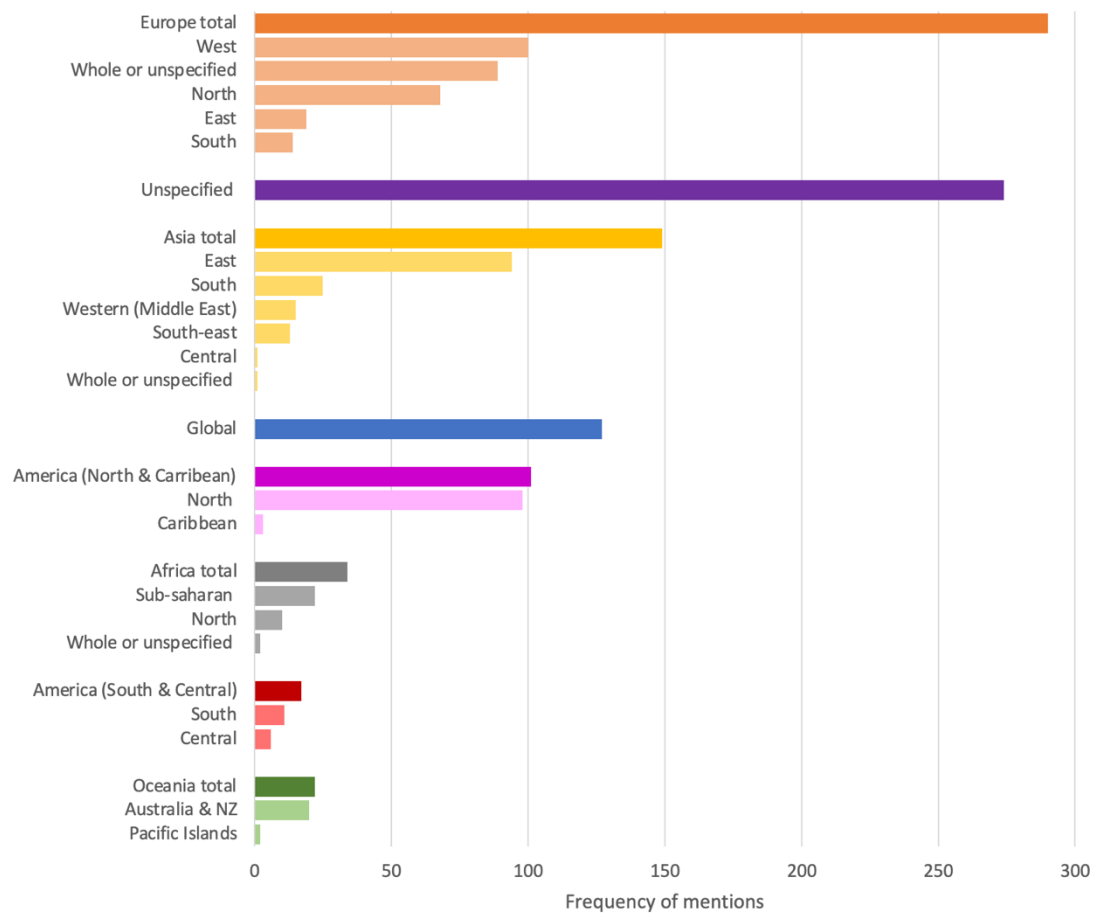

**Fig. 4 Breakdown of coding results for the geographical focus of phase-outs (absolute values, n=743 papers)**

This shows the results of the sub-codes that captured the geographical region targeted by the discussed phase-out strategy. Papers citing multiple regions received more than one code. For more information on coding procedure refer to Supplemental Information Note 3.
