# Supplementary material for: Mapping the contours of an emerging phase out science
Source: Research Square preprint supplement (doi:10.21203/rs.3.rs-1348121/v1), 2022-03-07
Supplement: Supplementary file 3 [file 333b5e6013149abeec46f023.xlsx]

## Sheet: A Sample of coded literature
ID	Year	Authors	Title	Author Keywords	Abstract	Source title
1	1970	Friedlander G.D.	Power, pollution, and the imperiled environment: II. East, Midwest, and West Coast: pollution-control plans of some major utilities; role of government in environmental matters; other proposed systems for reducing stack emissions: Utilities in the U.S. are very aware of the present public anxiety concerning the deteriorating environment. This concluding installment examines some of the specific p…		A number of the largest utility companies are embarking upon large-scale nuclear generating plant construction programs that may phase out up to 50 percent of their fossil-fuel stations by the end of the present decade. This move is being encouraged by the electrical suppliers, who, with the utilities and the AEC, are striving to convince a skeptical public that nuclear stations are completely sa…	IEEE Spectrum
2	1971	Harrison D.L.	Veterinary aspects of insecticides: Organochlorines		Many countries are in the process of phasing out large-scale use of organochlorine insecticides. Reasons for this policy can be summarized in terms of resistance, residues, and pollution, all of which stem from the property common to most organochlorines—persistence in the environment.	New Zealand Veterinary Journal
3	1976	DEWLING R.T., ANDERSON P.W.	NEW YORK BIGHT I: OCEAN DUMPING POLICIES.		AT PRESENT 80 PERCENT OF ALL OCEAN DUMPING FROM THE UNITED STATES TAKES PLACE OFF THE COASTS OF NEW YORK AND NEW JERSEY.ALTHOUGH RESTRICTIONS HAVE ONLY RECENTLY BEEN INTRODUCED IN THE INTERESTS OF THE ENVIRONMENT, THE U.S.ENVIRONMENTAL PROTECTION AGENCY (E.P.A.), REGION II, AIM TO PHASE OUT ALL INDUSTRIAL AND MUNICIPAL DUMPING AT SEA BY 1981.THE ARTICLE OUTLINES THE PLANNED PROGRESS TOWARDS LAND …	PERCENT CEANUS
4	1985	Benefield Curt S., Broadway Robert R.	REFINERY BLENDS GASOLINE FOR THE UNLEADED ERA.		A major upgrading project at Saber Refining Co. 's refinery at Corpus Christi, Texas, was completed in June, 1983. Gasoline produced by this refinery can meet market requirements now and in the future unleaded-gasoline environment. Recently, the Environmental Protection Agency announced its program to phase out lead in gasoline by stages, and this in the long run will necessitate new capital inve…	Oil and Gas Journal
5	1987	Shaw B., Winslett B.J., Cross F.B.	The global environment: a proposal to eliminate marine oil pollution.		Reviews recent tanker accidents that have had long- and short-term effects on the integrity of marine ecology. Flagship-of-convenience tankers contribute disproportionately to the oil production problem but are not the sole cause. Routine discharges of oil ballast by the tanker fleets of all registries are even more at fault. Both international and unilateral efforts to reduce the problem, or at …	Natural Resources Journal
6	1987	Shen G.T., Boyle E.A.	Lead in corals: reconstruction of historical industrial fluxes to the surface ocean		Twentieth century environmental lead chronologies for the western North Atlantic, Pacific, and Indian Oceans have been reconstructed from annually-banded scleractinian corals. Measurements of lattice-bound Pb in sequential coral bands reveal temporal changes in surface water Pb concentrations and Pb isotopic distributions. Perturbations are observable in all specimens studied, attesting to global…	Earth and Planetary Science Letters
7	1988	Wakabayashi K.	Molecular Design of Cyclic Imide Herbicides Using Biorational Approaches		Now that many biocidal types of herbicides are being phased out in the field of newer herbicides designs, because of phytotoxicological selectivity or environmental considerations, the photosynthesis inhibiting herbicides, which make up the group which we call inhibitors in photosynthetic electron transport, light-activated herbicides and so on, have come to dominate the herbicide molecular desig…	Journal of Pesticide Science
8	1990	Bach W., Jain A.K.	The CFC greenhouse potential of scenarios possible under the montreal protocol	CFCs; Climate protection; Greenhouse potential; Montreal Protocol; Ozone depletion potential; Trace gases	Measurement campaigns have given concrete evidence of serious ozone destruction both over the Antarctic and the Arctic regions. This has spawned international action for the protection of the ozone layer, such as the Vienna Convention in 1985 and the Montreal Protocol in 1987. Current chlorofluorocarbon (CFC) reduction plans are, however, inadequate. Therefore, a strengthening of the Protocol's p…	International Journal of Climatology
9	1990	Dunn John R.	Environmental concerns will widen auto use of specialty elastomers		Scientific concern over possible future damage to the stratospheric ozone layer led to the 1987 Montreal Protocol to limit production and consumption of the fully halogenated chlorofluorocarbons (CFCs) and halons. Recent scientific developments have heightened this concern and have led industry and governments alike to call for a strengthening of the Protocol, leading to an ultimate phase-out of …	Elastomerics
10	1990	Buonicore Anthony J.	Controlling toxic air emissions		There is little doubt that new legislation directed toward toxic air emissions and VOCs will have a major impact on the coatings industry (= GT for metal). The air toxics provisions of the proposed new Clean Air Act will require greater levels of control for both new and existing coating sources located anywhere in this country. Sources also located in ozone nonattainment areas will have the addi…	Metal Finishing
11	1990	Menon M.G.	Coping with global environmental change -- role of science and democracy.		The world's population increased form about 3 billion in 1960 to 4 billion in 1974, to 5 billion in 1987, and it is projected to grow to 6 billion by 1991 and to 8 billion by 1992. Finite, nonrenewable resources have to satisfy the increased need for sustenance of this population excess in a sustainable economic development mold. Human activity has upset natural processes with negative environmen…	Yojana
12	1990	Leaversuch Robert D.	Within 10 years refrigerators will be totally redesigned		Driven by concerns about the environment, government is calling on refrigerator manufacturers to cut energy use of their units dramatically, phase out chlorofluorocarbons, and insure the proper disposal of used refrigerators. The goals are to reduce dependence on fossil fuel (thereby slowing global warning), protect the ozone layer (which guards life on earth from solar radiation), and force recy…	Modern Plastics
13	1990	Anon	Protecting and replenishing the ozone layer		Even if CFCs were banned completely their ozone-destroying legacy would be with us for years to come. This paper proposes some radical interim measures which involve generating replacement ozone. CFCs and other ozone-depleting chemicals must be phased out as quickly as possible across the globe; existing CFCs in disused appliances must be collected, reclaimed and recycled or disposed of properly;…	Chemical Engineer (London)
14	1990	Fraser P.J., Bouma W.J.	New ozone protocol and Australia		From the Australian point of view, questions that need to be addressed are: What is the extent of ozone depletion observed to date over the Australian region and how will that affect UV-B? What will be the future ozone depletion experienced over Australia with the revised Protocol? What will be the benefit of terms of future ozone depletion if the use of CFCs in Australia is phased out earlier th…	Search
15	1990	Rotmans J., Swart R.	The gloomy greenhouse: Should the world phase out fossil fuels?	Carbon dioxide emissions; Climate change policy; Greenhouse effect; Greenhouse policy model; Scenario analysis	In 1988 the Toronto World Conference on the Changing Atmosphere called for a reduction of CO2 emissions of the industrialized countries by approximately 20% by the year 2005 as compared with 1988. A stabilization of CO2 concentrations would require an eventual emissions reduction of more than 50% of present levels. Model runs were performed with the Dutch Integrated Model for the Assessment of th…	Environmental Management
16	1991	[No author name available]	Climate change: the IPCC response strategies		Industrial countries have specific responsibility on two levels; a major part of emissions affecting the atmosphere originates in industrial countries, where scope for change is the greatest. Industrial countries should also help developing countries by additional financial resources, transfer of appropriate technology and technical cooperation geared to forestalling and managing environmental pr…	Climate change: the IPCC response strategies
17	1991	Schmidt K.	How industrial countries are responding to global climate change		Negotiations on an international climate change convention began in February 1991 under the auspices of the UN General Assembly. Delegates are now working to complete a framework convention to be signed by heads of state at the June 1992 Conference on Environment and Development (UNCED) in Brazil. This article summarizes actions as of May 1991 by the 24 members of the OECD and by the EC to addres…	International Environmental Affairs
18	1991	Pázsit I.	The Swedish Energy Situation and the Nuclear Debate	Chernobyl; energy debate; energy policy; government policies; nuclear energy; nuclear power; nuclear power plants; public opinion; referendum; reviews; social aspects; social democrats; Sweden; TMI	Sweden has the world's most intensive nuclear energy industry per capita. The full-scale build-up of this industry was nevertheless accompanied by an intensive public debate. A national vote (referendum) was taken in 1980, according to which nuclear energy should be gradually phased out. Many observers outside Sweden interpret this outcome as a firm public consensus on the abolition and that nucl…	Journal of the Atomic Energy Society of Japan / Atomic Energy Society of Japan
19	1991	Stryker Robert G.	Regulatory phase-out of CFCs and halons		This paper reports that the Environmental Protection Agency, and many countries of the world, are moving forward to control fully halogenated hydrocarbons, or what are more commonly referred to as chlorofluorocarbons (CFCs). CFCs and certain other halocarbons have been determined detrimental to the Earth's ozone layer. Ozone is formed by the absorption of part of the sun's ultraviolet radiation b…	Energy Engineering: Journal of the Association of Energy Engineering
20	1991	Spauschus Hans O.	Emerging HVAC & R issues. Energy, environment and economics		This article describes candidate alternative refrigerants and reviews technical problems that must be resolved to ensure reliability and durability of products and services. The combination of environmental concerns resulting from CFC emissions, energy penalties from alternative refrigerants and an expanding global market will have a major impact on refrigeration and air-conditioning products and…	ASHRAE Journal
21	1992	Levine M.D., Sathaye J.A., Craig P.P., Peck S.C.	Strategies for addressing climate change: Policy perspectives from around the world		The greenhouse effect is intrinsically global. Accordingly, effective responses require global coordination. While limited policies have been adopted, notably for phasing out chlorofluorocarbons, there is no clear consensus as to what to do about other greenhouse gases. In this paper, we survey attitudes and policy responses among the nations of the world. Public opinion surveys are consistent in…	Energy
22	1992	Gustavsson L., Johansson B., Bülow-Hübe H.	An environmentally benign energy future for Western Scania, Sweden		Energy systems which significantly reduce emissions of acidifying gases and carbon dioxide from non-mobile sources are identified for Western Scania, using an end-use accounting model. Carbon dioxide emissions can be reduced to 75% and acidifying gases to 50% of 1988 levels by 2010 using an energy system based on efficient end-use technologies, cogeneration, and renewable sources, while satisfyin…	Energy
23	1992	Mcfarland M.	Investigations of the environmental acceptability of fluorocarbon alternatives to chlorofluorocarbons		Chlorofluorocarbons (CFCs) are currently used in systems for preservation of perishable foods and medical supplies, increasing worker productivity and consumer comfort, conserving energy and increasing product reliability. As use of CFCs is phased out due to concerns of ozone depletion, a variety of new chemicals and technologies will be needed to serve these needs. In choosing alternatives, indu…	Proceedings of the National Academy of Sciences of the United States of America
24	1993	Mintzer I.M.	Implementing the Framework Convention on Climate Change: incremental costs and the role of the GEF		This paper is the first among a series of GEF Working Papers to deal with the Program for Measuring Incremental Costs for the Environment (PRINCE). The GEF Global Environment Facility is a financial mechanism that provides grants to developing countries for projects aimed at protecting the global environment. Participating governments provided US $2.6 M from the Core Fund for a three-year program…	Global Environment Facility Working Paper
25	1993	Takagi Takeo, Iwata Hiroshi, Ishii Yoshiyuki	Development of substitutes for ozone layer-destroying CFCs		Corresponding to a worldwide decision taken by the contracting parties to the Montreal Protocol, Hitachi has been developing alternative technologies for products that contain CFCs and HCFCs, along with alternative cleaning technologies for the manufacturing process of precise mechanical cleaning technologies for the manufacturing process of precise mechanical parts and semiconductors. In regard …	Hitachi Review
26	1993	Rubenstein R.	Human health and environmental toxicity issues for evaluation of halon replacements	Cardiotoxicity; Fire extinguishing; Halon substitute	The Clean Air Act Amendments of 1990 require the US Environmental Protection Agency (EPA) to phase out production and use of ozone-depleting chemicals - among them, the fire suppressants, halons. As part of its rulemaking efforts EPA must evaluate the potential hazards to human health and the environment that could result from exposure to compounds that may substitute for halons. The EPA bases he…	Toxicology Letters
27	1993	Dekleva Thomas W., Colmery Stephen H., Corr Stuart, Ax Hennrik, Davis Norman, Fisher Ian	Retrofitting with HFC-134a		With the current regulatory climate regarding the phase-out of CFCs, the automotive industry is choosing the manner in which it will retrofit mobile air conditioning (MAC) system . At present, it appears that this choice will be the use of HFC-134a. The paper discusses the mandated change from CFC-12 to HFC-134a refrigerants in mobile air conditioning requires knowledge of the possible complicati…	Automotive Engineering International
28	1994	Craig J.V., Swanson J.C.	Review: welfare perspectives on hens kept for egg production.		The wild ancestors of chickens, along with those of most other farm animals, were preadapted to domestication because their lack of specialized requirements allowed them to adapt to a wide variety of environments provided by humans. Currently most commercial chickens kept for table-egg production are incubated, reared, and maintained as productive adults in high-density, artificial environments. …	Poultry science
29	1994	Kirschner Elisabeth M.	Environment, health concerns force shift in use of organic solvents		Federal (=USA) regulations favor aqueous formulations, no-solvent technologies and small-volume alternative organics as safety concerns press for the phasing out of organic solvents. Demand for engineered solvents to replace environmentally harmful cleaners, degreasers and paint strippers is projected to increase. However, some of the qualities of the banned solvents may never be replicated by re…	Chemical and Engineering News
30	1994	Van Der Burgt C.	Dealing with contaminated dredged materials with reference to the Oslo Convention 1972 and the new Paris Convention 1992		Protection of the sea has received much political attention-for example, at successive North Sea Conferences environmental ministers have formulated a stringent policy with the aim of reducing pollution in the north-east Atlantic. In the past this area received many substances from many sources, but gradually intergovernmental action since 1972 in the Oslo and Paris Conventions has succeeded in t…	Marine Pollution Bulletin
31	1994	van der Voet E., van Egmond L., Kleijn R., Huppes G.	Cadmium In The European Community: A Policy-oriented Analysis	Cadmium, materials balance, environmental policy, European Community, integrated pollution management, economic characteristics	The economic production and use of cadmium leads to environmental problems within the European Community (EC). The use of cadmium is still increasing significantly, mainly in batteries. This article presents an analysis of cadmium flows in the economy and the environment of the EC, using the 'Substance Flow Analysis' method, a variant of the materials balance approach. Several cadmium abatement p…	Waste Management and Research
32	1995	Schulkin J., Kleindorfer P.	Equity decisions: economic development and environmental prudence		This paper will outline several theories of equity and explore their implications in the specific context of stratospheric ozone depletion and the phasing out of CFCs. It argues that equity matters are public, accessible, and basic to the culture that we live in, and that the legitimation of equitable treatment in a particular context depends on participation in the decisions, as well as the cost…	Human Rights Quarterly
33	1995	Sinyak Y.	Nuclear energy in Eastern Europe and the former Soviet Union: how safe and how much?		The wild ancestors of chickens, along with those of most other farm animals, were preadapted to domestication because their lack of specialized requirements allowed them to adapt to a wide variety of environments provided by humans. Currently most commercial chickens kept for table-egg production are incubated, reared, and maintained as productive adults in high-density, artificial environments. …	Energy & Environment
34	1995	King K., Munasinghe M.	Ozone layer protection: country incremental costs		The World Bank's Environment Department promotes the development of practical methodologies for environmental costing and valuation. One of the methodologies pioneered and developed in the Bank is the calculation of the incremental costs of projects eligible for financing under the Multilateral Fund of the Montreal Protocol on Substances that Deplete the Ozone Layer. Since then this methodologica…	Ozone layer protection: country incremental costs
35	1995	Hundy Guy	Refrigeration and the environment		Air conditioning users are pressured to consider alternative refrigerants as the Montreal Protocol mandates the imminent phase-out of ozone-depleting substances such as CFC. Industries and processes dependent on refrigeration including air conditioning plant are therefore forced to look towards environment-friendly substitutes such as the non-toxic and non-flammable hydrofluorocarbon (HFC)-based …	HAC
36	1995	Pravdić V.	The chemical industry in the Croatian Adriatic region: identification of environmental problems, assessment of pollution risks, and the new policies of sustainability	Chemical industry; Croatian Adriatic region; Ecotoxicological impact; Environmental pollution risk	The economic production and use of cadmium leads to environmental problems within the European Community (EC). The use of cadmium is still increasing significantly, mainly in batteries. This article presents an analysis of cadmium flows in the economy and the environment of the EC, using the 'Substance Flow Analysis' method, a variant of the materials balance approach. Several cadmium abatement p…	Science of the Total Environment
37	1995	Smithart Eugene	Change and progress in the HVAC industry		Since the 1970s, the HVAC industry has been beleaguered by challenges as a result of the environmental demands for greater energy efficiency, the need to phase out CFCs, and consequently, the development of alternatives and new equipment. This set of realities offers new opportunities for HVAC customers to save money while protecting the environment by containing existing CFC stocks, converting s…	Energy Engineering: Journal of the Association of Energy Engineering
38	1995	Noakes T.J.	CFCs, their Replacements, and the Ozone Layer	CFC; HFA; ozone chemistry; ozone depletion; ozone ‘hole’	Chlorofluorocarbons (CFCs) have become widely used in a variety of applications, ranging from aerosols to refrigeration, through their unique combination of the properties of nonflammability and general inertness. However, their chemical stability, which makes CFCs relatively safe and non-toxic, is also responsible for their potential to damage the environment. From 1974 opinion developed that CF…	Journal of Aerosol Medicine: Deposition, Clearance, and Effects in the Lung
39	1995	D'souza S.	The Montreal Protocol and Essential Use Exemptions	CFC; MDI; Montreal Protocol; ozone; ‘essential use’ exemption	The Montreal Protocol is an international treaty to phase out chlorofluorocarbons (CFCs) and other substances which destroy stratospheric ozone. The target date for the ban in developed countries, 1 January 2000, was subsequently advanced to 1 January 1996, with CFC production allowed temporarily for uses deemed ‘essential’ by the Parties. Seventeen governments submitted nominations to the United…	Journal of Aerosol Medicine: Deposition, Clearance, and Effects in the Lung
40	1995	Tweddle Richard, Geosits Peter	What to consider in selecting a cleaning process		For many organizations in the engineering industry, cleaning is a vital link in the chain of production. Finding a cleaning process for organizations that will work both now and in the future is necessary. With the implementation of increasingly stringent environment legislation, it is critical that the cleaning system allows organizations to limit emissions of certain substances. A further facto…	Precision Cleaning
41	1995	Anon	CFC phase-out implications for refrigeration equipment users		The gradual phase-out of CFCs in Europe is making operators of refrigeration equipment inconvenient, and is leading to an illegal 'grey market' situation, with prices increasing. Some operators have stockpile CFCs for their own use which has a further negative effect on the CFCs availability. With the phase-out of CFCs, equipment owners must make some tough decisions. Basically, there are five st…	H and V Engineer
42	1996	Russick E.M., Poulter G.A., Adkins C.L.J., Sorensen N.R.	Corrosive effects of supercritical carbon dioxide and cosolvents on metals	Carbon dioxide; Corrosion; Cosolvents; Metals; Supercritical	With the eventual phase-out of chlorofluorocarbons and hydrochlorofluorocarbons, and restrictive regulations concerning the use of other volatile organic compounds as cleaning solvents, it is essential to seek new, environmentally acceptable cleaning processes. We are investigating supercritical carbon dioxide (CO2) as an alternative solvent for precision cleaning of machined metal parts in gover…	Journal of Supercritical Fluids
43	1996	Stapleton J.J.	Fumigation and solarization practice in plasticulture systems	biofumigation; biological control; intensive agriculture; methyl bromide; soil disinfestation; solar heating	Soil disinfestation strategies for intensive vegetable crop production, which have relied heavily on chemical fumigants for the past 40 years, are now undergoing rapid change. The principal driving force of change has been governmental regulatory action to phase out chemicals with properties deemed to be hazardous to the environment and/or public health. Softer methods of soil disinfestation, whi…	HortTechnology
44	1996	Cavallini A.	Working fluids for mechanical refrigeration - Invited paper presented at the 19th International Congress of Refrigeration, The Hague, August 1995	Mechanical refrigeration; Refrigerants; Working fluids	The phasing out of fully halogenated halocarbons becomes effective at the end of 1995 by international agreement. Under the same ozone depletion issue, the companion fluids HCFCs are suffering a similar fate, as they are considered controlled substances with a virtual phase-out by 2020, and more drastic reductions may be proposed in the near future. Some international action might also be agreed …	International Journal of Refrigeration
45	1996	Valić F., Beritić-Stahuljak D.	Are chlorine-free compounds a solution for health problems caused by ozone-depleting substances?		In January 1996, the Government of Croatia and United Nations Environment Programme (UNEP) signed an agreement on the phasing out of ozone-depleting substances in Croatia, making the problem of identifying adequate substitutes a high priority. In this paper, the main ecologic characteristics of chlorine-containing fully halogenated chlorofluorocarbons (CFCs) and partially halogenated chlorofluoro…	Acta medica Croatica : casopis Hravatske akademije medicinskih znanosti
46	1996	Krueger J.P., Rowlands I.H.	Institutions for global environmental change		Global conventions succeed even when they appear to fail. Despite the great progress made in phasing out CFC production in industrialized countries, the Montreal Protocol has not yet achieved a guarantee that stratospheric ozone depletion will be a scientific footnote by 2100. Krueger and Rowlands show that a healthy black market in illegal CFCs is being fostered by, among other things, a Russian…	Global Environmental Change
47	1996	Laffont J.-J., Tirole J.	Pollution permits and environmental innovation	Asymmetric information; Environment; Innovation; Regulation	This paper starts with a warning about the negative impact of plain pollution allowance markets on environmental pollution innovation. Stand-alone spot markets enable the government to expropriate an innovation by offering a competing 'technology' (pollution permits) that puts an arbitrary downward pressure on the licensing price. Advance allowances reduce expropriation but still create suboptima…	Journal of Public Economics
48	1996	Sims R.E.H.	A sustainable energy future for New Zealand		New Zealand has the potential to become the first country to be totally dependent on renewable energy sources. Already hydro power supplies 70% of the total electricity demand and geothermal a further 5%. The challenge is to phase out the remaining 25% thermal power generation and to provide sufficient liquid transport fuels from the biomass resources. The natural gas fields currently supply over…	Renewable Energy
49	1996	Scheuhammer A.M., Norris S.L.	The ecotoxicology of lead shot and lead fishing weights	Birds; Environmental fate; Lead poisoning; Lead shot; Lead sinkers; Toxicity	Lead shot ingestion is the primary source of elevated lead exposure and poisoning in waterfowl and most other bird species. For some species (e.g. Common Loons, Gavia immer), lead sinker ingestion is a more frequent cause of lead poisoning. In freshwater environments where recreational angling activity and loon populations co-occur, lead poisoning from ingestion of small (< 50 gram) lead sinkers …	Ecotoxicology
50	1996	Hope K.R.	International trade and international technology transfer to eliminate ozone-depleting substances		This is a discussion and analysis of the issues related to international trade and international technology transfer to eliminate ozone-depleting substances on a global scale. The premise is that policies promoting trade and protecting the ozone layer through technology transfer are mutually reinforcing. The intent of simultaneously fostering trade and environmental improvement is encompassed in …	International Environmental Affairs
51	1997	Chiaradia M., Gulson B.L., James M., Jameson C.W., Johnson D.	Identification of secondary lead sources in the air of an urban environment	Gasoline; Lead isotopes; Pb; Urban air	High precision lead isotopic data have been measured from particulates deposited on filters from two suburbs of Sydney (NSW, Australia) and gasoline from two main brands to evaluate the source of lead in air following the phasing out of leaded gasoline in Sydney in 1986 and a 25% reduction of lead in leaded gasoline in 1994. These measures have resulted in a 75% reduction of lead in Sydney air no…	Atmospheric Environment
52	1997	Karliner J., Morales A., O'Rourke D.	The barons of bromide: The corporate forces behind toxic poisoning & ozone depletion		The pesticide methyl bromide poisons farm workers and communities and destroys the ozone layer. A broad coalition, encompassing local communities, farm workers, environmentalists and health professionals, are working for the chemical's rapid and total phase-out worldwide and its replacement by sustainable agricultural practices. Methyl bromide's manufacturers and their associates, however, are lo…	Ecologist
53	1997	Hayman C.D.	CFCS and the ozone layer		Ozone is an important constituent of the atmosphere. Ozone forms a distinct layer in the lower stratosphere known as the ozone layer. The ozone layer acts as a fragile shield because it protects man and other life forms from exposure to harmful short-wavelength ultraviolet (UV) radiation. The agents, particularly chemical, which affect the amount of ozone present in the atmosphere have been a sou…	British Journal of Clinical Practice
54	1998	Heid K.	Transformer PCB management		Although concentrated efforts have been made to deplete PCB transformers from the Canadian environment, numerous transformers (as well as ballasts, capacitors and magnets) continue to exist throughout the Canadian mining industry. The existing installed base is slowly being phased out as environmental issues come under increasingly high profile. The following article identifies the potential prob…	CIM Bulletin
55	1998	Meuller L., Herstad-Svard S., Basta J., Wane G.	Pulp bleaching without chlorine - a future reality		Strategies done: The pulping world today shows a fast and significant conversion to chlorine dioxide bleaching-ECF, in the major pulp producing regions. In the near future, chlorine gas will be totally phased out as a pulp bleaching chemical on the international level due to global market demands and strict environmental regulations. Chlorine gas is by far the most selective and most cost effecti…	Paper Asia
56	1998	Dewan C.A.	Zambia's efforts to control air pollution - Nationally and internationally		A discussion on air pollution prevention efforts in Zambia covers the Pollution Control Division (which handles environmental issues concerning waste management (solid, liquid, and gaseous), and toxic substances management (toxic chemicals and radiation)) and the Planning and Management Division (which deals with Environmental Impact Assessments, Natural Resources, and Environmental Information) …	World Clean Air Congress
57	1998	Mmochi A.J.	Trends in the types, amounts, and toxicity of pesticides used in Tanzania: Efforts to control pesticide pollution in Zanzibar, Tanzania		The amount of pesticides used in Tanzania increased from 330 g capita-1 in 1977 to 500 g capita-1 in 1988. With population growth at 2.7%, this implies a significant increase (140%) in pesticide use. The control of importation, formulation, and use of pesticides is inefficient. Imported amounts can exceed the authorized amounts, because of donations and the specific projects that import pesticide…	Ambio
58	1998	De Fouw J.	Environmental health criteria for carbon tetrachloride		Carbon tetrachloride is a clear, colourless, volatile liquid with a characteristic, sweet odour. It is miscible with most aliphatic solvents and is itself a solvent. The solubility in water is low. Carbon tetrachloride is non-flammable and is stable in the presence of air and light. Decomposition may produce phosgene, carbon dioxide and hydrochloric acid. The source of carbon tetrachloride in the…	Environmental Health Criteria
59	1999	McCulloch A.	CFC and Halon replacements in the environment	CFC substitutes; Climate change; Environmental chemistry; Global warming; Halon substitutes; Stratospheric ozone depletion; Trifluoroacetate (environmental)	Substitute fluorocarbons may have direct environmental impact, for example as greenhouse gases, or indirect impacts through the products of their decomposition in the environment. The mechanisms of that atmospheric decomposition are reviewed here and shown to be well established now. The end products are halogen acids and trifluoroacetic acid, all of which pre-exist in the environment in quantiti…	Journal of Fluorine Chemistry
60	1999	De Ceuster T.J.J., Hoitink H.A.J.	Prospects for composts and biocontrol agents as substitutes for methyl bromide in biological control of plant diseases		Methyl bromide, an effective soil fumigant for control of soilborne plant pathogens, is scheduled to be phased out by 2005 because of its negative impacts on the environment. Many chemical alternatives to methyl bromide have been proposed but so far, none have proved as effective. Composts have long been recognized to provide a degree of control of diseases caused by soilborne plant pathogens. Fo…	Compost Science and Utilization
61	1999	Holmberg J., Lundqvist U., Robèrt K.-H., Wackernagel M.	The ecological footprint from a systems perspective of sustainability	Backcasting; Ecological footprint; Indicators; Measures; Principles; Sustainability; The Natural Step	The Ecological Footprint (EF) is a method for estimating the biologically productive area necessary to support current consumption patterns, given prevailing technical and economic processes. By comparing human impact with the planet’s limited bioproductive area. this method tests a basic ecological condition for sustainability. The ecological footprint has gained popularity for its pedagogical s…	International Journal of Sustainable Development and World Ecology
62	1999	Panda S.M.	Towards a sustainable natural resource management of tribal communities: Findings from a study of swidden and wetland cultivation in remote hill regions of eastern India	Ecological limits; Forest degradation; Swidden cultivation; Tribal communities	Environmental degradation in many hill forest regions of Asia, inhabited by indigenous/tribal communities is growing at an unprecedented rate. The case of Orissa State in eastern India is no exception. The government is of the view that the local population is responsible for forest degradation as they practice swidden cultivation and forest gathering indiscriminately to sustain their livelihoods…	Environmental Management
63	1999	Dunk A.S.	An examination of the role of financial investment appraisal methods in the context of international environmental regulation: The Montreal Protocol and CFC substitutes in domestic refrigeration	Environment; Investment appraisal; Regulations	Domestic refrigerator manufacturers have had to cease their use of CFCs following the implementation of the Montreal Protocol. Two primary substitute refrigerants have been adopted; one being HFC-134a and the other being hydrocarbons. Given the availability of hydrocarbons and pressure from both the green movement and the Framework Convention on Climate Change, there has been a marked increase in…	Accounting, Auditing & Accountability Journal
64	1999	Toman M.A., Morgenstern R.D., Anderson J.	Economics of `when' flexibility in the design of greenhouse gas abatement policies		This paper focuses on the desirability, from an economic perspective, of setting fixed and relatively short-term targets and timetables, such as those contained in the Kyoto Protocol, as a means of achieving longer-term climate change mitigation goals. The paper argues that whatever long-term policy goals are adopted, greater flexibility lowers implementation costs. Lower implementation costs, in…	Annual Review of Energy and the Environment
65	1999	Ross R.T.	Current status of domestic and international controls for methyl bromide and the status of alternatives		Methyl bromide (MB) is a versatile highly effective, fast acting fumigant employed in a number of ways to kill organisms destructive to plants. Its use is important for the movement of commodities in international trade for the disinfestation of pests. The compound is unique in that it provides a wide range of pest control, may be applied to a broad spectrum of both food and non-food commodities,…	ACS Symposium Series
66	2000	Lim C.Y., Moon K.H., Lee B.W.	The role of nuclear power in the sustainable energy future of Korea		The purpose of this study is to analyze the role of nuclear power in the sustainable energy supply future of Korea. For this purpose, an energy-economy interaction model of the computational general equilibrium (CGE) approach, the Korean Energy and Environmental Policy model(KEEP) was adapted. The model is a non-linear optimization model that maximizes the discounted value of Korean economic util…	Progress in Nuclear Energy
67	2000	Riahi K., Roehrl R.A.	Energy technology strategies for carbon dioxide mitigation and sustainable development	Emissions mitigation; Energy technology strategies; Energy-economic scenarios; IPCC SRES; Sustainable development	This paper analyzes a set of global energy-economic development scenarios for the 21st century. The set includes non-climate-policy scenarios that are part of the recent Special Report on Emissions Scenarios (SRES) of the Intergovernmental Panel on Climate Change (IPCC). We apply climate policies to some of these scenarios to achieve stabilization of atmospheric CO2 concentrations at 550 parts pe…	Environmental Economics and Policy Studies
68	2000	Dutschke M., Michaelowa A.	Climate cooperation as development policy: the case Of Costa Rica	AU; climate policy; developing countries	Project-based climate cooperation between industrial and developing countries was first proposed in the early l990s, then under the name of joint implementation (JI). Once in place, this cooperation could lead to a high amount of additional financial flows to developing countries. Nevertheless, many NGOs and developing country representatives were in the beginning very sceptical about ii and fear…	International Journal of Sustainable Development
69	2000	Mori S.	Effects of carbon emission mitigation options under carbon concentration stabilization scenarios	Carbon concentration stabilization; Carbon disposal technologies; Global warming; Integrated assessment; Nuclear power	This paper evaluates the effects of carbon emission mitigation options from a long-range perspective using an integrated assessment model called MARIA (Multiregional Approach for Resource and Industry Allocation). This model has been developed to assess the potential contribution of fossil, biomass, nuclear, and other energy technologies and land-use changes to future greenhouse gas (GHG) emissio…	Environmental Economics and Policy Studies
70	2000	Stafford D.M., Morton S.R., Ash A.J.	Towards sustainable pastoralism in Australia's rangelands		The Australian rangelands are spatially complex, variable to the point where reactions to disturbance are often unpredictable, and generally uneconomic to rehabilitate once damaged. Hence some areas of the rangelands are inherently prone to degradation through management mistakes. Further, economically optimum short-term stocking rates are often well above what the environment seems able to toler…	Australian Journal of Environmental Management
71	2000	Kurosawa A.	Long term nuclear power role under CO2 emission constraint		Strategies done: Global environmental issue including climate change is one of the important factors to outlook the 21st century energy mix. Future greenhouse gases emissions trajectory, such as CO2 emissions, has close relationship with nuclear power scenario. Therefore, nuclear power options consideration including phase out and continuous operation should be assessed under international CO2 em…	Progress in Nuclear Energy
72	2000	Conway G.	Genetically modified crops: Risks and promise	Bacillus thuringiensis (B.t.); Food security; Genetically modified rice; GM foods; Intellectual property rights; Marker-aided selection; Monsanto, Participatory approaches; Plant biotechnology	GM foods have the potential to provide significant benefits for developing countries. Over 800 million people are chronically undernourished, and 180 million children are severely underweight for their age. By 2020, there will be an extra two billion mouths to feed. Ecological approaches that underpin sustainable agriculture (e.g., integrated pest management) and participatory approaches that str…	Conservation Ecology
73	2000	[No author name available]	MTBE in gasoline		Strategies done: A discussion on MTBE covers its properties; its presence in drinking water supplies and in groundwater wells following its use in gasoline, which was first publicized when reformulated gasoline was mandated (GT might be for MTBE oil) over large areas of the US; the contamination of Lake Tahoe (also a drinking water resource) by watercraft using 2-stroke fuel, which led the Govern…	CONCAWE Review
74	2000	Miller Dexter K.	MTBE faces an uncertain future		Methyl tertiary butyl ether (MTBE) is a major component of US gasoline. Today, US states are set to phase out MTBE because of its effects on the environment. In view of this, the US government is starting a detailed inter-departmental study of the whole air problem, looking at the various choices, costs, and problems.	Oil and Gas Journal
75	2000	[No author name available]	Industry groups at odds over New York plan to ban MTBE		Strategies done: In summer 2000, two industry groups squared off in federal court after New York passed legislation to phase out MTBE by 2004. The Oxygenated Fuels Association (OFA) complained in federal court that the New York law contradicts the federal law. According to the Renewable Fuels Association (RFA), the OFA challenge is based on the groundless notion that, by moving to protect its dri…	Oil and Gas Journal
76	2000	Toman M.A., Withagen C.	Accumulative pollution, 'clean technology,' and policy design	Nonconvexities; Stock externalities; Sustainable development	This paper addresses the optimal long-term management of an accumulative but assimilable pollutant through economic incentive policies that restrict more damaging production processes and induce more benign alternatives. Using a simple general equilibrium approach, we consider the possibility that the assimilative capacity of the environment is eventually exhausted by pollution accumulation. In t…	Resource and Energy Economics
77	2000	True W.R.	IMO plans to speed single-hulls' phase out	Hull; Hull form; Regulation; Regulatory framework; Tanker ship	Strategies done: The International Maritime Organization (IMO) is moving towards a formal, global timetable for phasing out single-hull ocean-going oil tankers. IMO's Marine Environment Committee has approved amendments to MARPOL 73/78 and which identify categories of oil tanker and set out alternative schemes for phasing these out. This article presents an analysis of these proposals and discuss…	Oil and Gas Journal
78	2000	Kearns G.	Textile mills face tighter effluent controls everywhere in Canada		A joint Environment Canada/Health Canada committee has recently confirmed a federal government proposal that all textile mill effluents should be considered toxic. Permissable levels of nonylphenol (NP) and its ethoxylates (NPEs) are to be substantially removed, with a de facto bar on NPEs being discharged to Toronto's sewage systems. NP and NPEs have already been phased out of use in Europe.	Canadian Textile Journal
79	2000	[No author name available]	IMO phase-out proposals to hit Aframax, Panamax tankers hard	Legislation; Tanker ship	Strategies done (none): Aframax and Panamax oil tankers will be hit hard by phase-out timetables proposed for single-hull tankers by the International Maritime Organization (IMO). The IMO proposals are outlined. Tankers vulnerable to the phase-out timetable of the 45th session of IMO's Marine Environment Protection committee (MEPC 45) are single-hull tankers with segregated ballast tanks: 269 Afr…	Oil and Gas Journal
80	2000	Ursínyová M., Hladíková V.	Chapter 4 Lead in the environment of Central Europe	Air; Central Europe; Environmental contamination; Food; Human biological materials; Lead; Sediments; Water	Lead contamination was identified as one of the most significant environmental problems in Central Europe. Lead adversely affects many organ systems in the human body, especially the nervous system of children, manifesting itself as an impairment of cognitive functions. Therefore, the countries of the region introduced policies to reduce lead use in gasoline. Austria and the Slovak Republic phase…	Trace Metals in the Environment
81	2000	[No author name available]	Chemicals management...UK reveals strategy		The UK government's publication of its strategy on the phase-out of industrial chemicals harmful to the environment has angered environment organizations for seemingly favoring voluntary agreements with industry over chemicals management legislation. The strategy, ″Sustainable Production and Use of Chemicals: A Strategic Approach,″ aims to facilitate the risk assessment process for high productio…	European Chemical News
82	2000	[No author name available]	UK sets its own pace on gases		The UK becomes the first European nation to aim beyond its legal commitments under the Kyoto protocol as it sets out its own strategies for reducing greenhouse gas emissions. These include a climate change levy, agreements with energy-intensive industries, a phase-out of chlorofluorocarbons for hydrofluorocarbons, and the doubling of cogeneration capacity by 2010. These proposals would reduce by …	European Chemical News
83	2000	[No author name available]	Fluorinated chemicals...3M drops Scotchgard		Minnesota Mining & Manufacturing Co (3M) will phase out certain repellents and surface active agents produced using perfluorooctanyl chemistry by end-2000 after tests showed that the chemical compounds linger in the human body and the environment. The products to be withdrawn from the market, including some Scotchgard products, have sales of around $300 million/yr and account for 2% of 3M's total…	European Chemical News
84	2000	[No author name available]	Chemicals policy...Swedish report delivered		Swedish environment minister Kjell Larsson received the report of a special committee commissioned by the government to make recommendations on how to implement its proposed chemicals policy. Among the committee's recommendations are: banning all persistent and bioaccumulative organic substances from chemical or manufactured products which are available to consumers between 2010 and 2015; phasing…	European Chemical News
85	2000	Cook R.J.	Advances in plant health management in the twentieth century		Plant health management is the science and practice of understanding and overcoming the succession of biotic and abiotic factors that limit plants from achieving their full genetic potential as crops, ornamentals, timber trees, or other uses. Although practiced as long as agriculture itself, as a science-based concept, plant heath management is even younger than integrated pest management (IPM), …	Annual Review of Phytopathology
86	2000	Fujimoto Y., Andersen S., Junchaya T., Rajadanuraks W., Vithoontien V.	Case study 23: CFC-free refrigerators in Thailand	CFC-free refrigerators; HFC-134a; Japan; N ⇔ S; ODS phaseout; Technology transfer; Thailand; USA	This case study is for the industrial sector and the stakeholders are Government of Thailand, Hitachi, Matsushita, Mitsubishi Electric, Toshiba of Japan, and the Japan Electrical Manufacturers Association (JEMA). The government of Thailand and the multinational companies decided to speed the phase-out of ozone depleting substances (ODSs) through a voluntary pledge. The technical challenge of achi…	Methodological and Technological Issues in Technology Transfer
87	2000	Andersen S.O., Corona J., Mosler C.	Case study 17: CFC (ODS) solvent phaseout in Mexican electronic industries	Mexico; ODS phaseout; Technology diffusion within the country with potential of a South-South (S⇔S) transfer; Technology transfer North-South (N⇔S); U.S. EPA	This industrial sector case study exemplifies the Mexican government's leadership and technology cooperation by multinational companies to set in place the technology know-how and information necessary to rapidly eliminate CFC solvents used in the Mexican electronic manufacturing industry. The CFCs were phased out under the Montreal Protocol by using HFCs, which are regulated under the Kyoto Prot…	Methodological and Technological Issues in Technology Transfer
88	2001	Reeves A.D., Patton D.	Measuring change in sterol input to estuarine sediments		In complex estuarine environments suites of sterols can be used to define autochtonous and allochtonous sources of organic matter and to identify biological processes occuring in situ. Coprostanol is a major faecal sterol present in human waste (40%-60% of total faecal sterols excreted). As raw sewage is the primary source of this sterol, its determination is an effective measure of the degree of…	Physics and Chemistry of the Earth, Part B: Hydrology, Oceans and Atmosphere
89	2001	Anex R.P., Englehardt J.D.	Application of a predictive Bayesian model to environmental accounting	Bayesian statistics; Environmental accounting; Project evaluation; Risk assessment; Risk management	Environmental accounting techniques are intended to capture important environmental costs and benefits that are often overlooked in standard accounting practices. Environmental accounting methods themselves often ignore or inadequately represent large but highly uncertain environmental costs and costs conditioned by specific prior events. Use of a predictive Bayesian model is demonstrated for the…	Journal of Hazardous Materials
90	2001	Ellis D.A., Mabury S.A., Martin J.W., Muir D.C.G.	Thermolysis of fluoropolymers as a potential source of halogenated organic acids in the environment		Following the introduction of hydrochlorofluorocarbon (HCFCs) and hydrofluorocarbon (HFCs) gases as replacements for the ozone-destroying chlorofluorocarbons (CFCs), it has been discovered that HCFCs/HFCs can degrade in the atmosphere to produce trifluoroacetic acid, a compound with no known loss mechanisms in the environment2,3, and higher concentrations in natural waters4 have been shown to be …	Nature
91	2001	Fuerhacker M., Scharf S., Pichler W., Ertl T., Haberl R.	Sources and behaviour of bismuth active substances (BiAS) in a municipal sewage treatment plant	BiAS; Endocrine disruptors; Industrial sources; Municipal sources; Nonylphenol	Non-ionic surfactants are widely used for household and industrial purposes. For different reasons the metabolites, e.g. 4-nonylphenol, nonylphenol monoethoxylate, nonylphenol diethoxylate and 4-tert-octylphenol, are especially considered to be endocrine disruptive and thus potentially harmful for the environment. In this study, field samples of raw wastewater from different point sources, includ…	Science of the Total Environment
92	2001	Hamacher T., Lako P., Ybema J.R., Korhonen R., Aquilonius K., Cabal H., Hallberg B., Lechón Y., Lepicard S., Sáez R.M., Schneider T., Ward D.	Can fusion help to mitigate greenhouse gas emissions?	21st Century; Fusion; Greenhouse gas-emissions	If measures to reduce greenhouse gas-emissions are taken and if fission will be phased out at the beginning of the 22nd century fusion has a good chance to win considerable shares of the electricity market. A detailed model of the Western-European energy system was made using the MARKAL toolkit. Scenarios were designed to understand the conditions that would make fusion a viable electricity produ…	Fusion Engineering and Design
93	2001	Brown A.J.	Beyond public native forest logging: National forest policy and Regional Forest Agreements after South East Queensland		Since 1995, Australia's Regional Forest Agreement (RFA) process has set new standards in bioregional assessment and strategic environmental planning. Its success in achieving nine Commonwealth-State agreements however has been matched by a noted lack of direct public support for its outcomes from community groups or the timber sector. This article examines the RFA process for South East Queenslan…	Environmental and Planning Law Journal
94	2001	Leaf D.	Managing global atmospheric change: A U.S. policy perspective		There are several air pollution issues that concern the international community at the regional and global level, including acid deposition, heavy metals, persistent organic pollutants, stratospheric ozone depletion, and climate change. Governments at the regional and global levels have entered into various agreements in an effort to deal with these problems. This paper deals with two major globa…	Human and Ecological Risk Assessment (HERA)
95	2002	Cartalis C., Nikitopoulou T., Proedrou M.	Climate changes and their impact on agriculture in Greece: A critical aspect for medium- and long-term environmental policy planning	Agriculture; Climate changes; Environmental land-use policy; Greece	Strategies done (none):Climate changes in Greece for the period 1990 to 2030 were estimated with the use of a climatic model (ESCAPE, Univ. of East Anglia, 1992). Four scenarios were constructed, depicting existing or potential measures for the stabilization, reduction or phase-out of greenhouse gases. Estimates were made regarding the potential suitability zones for some crops (grain maize, gras…	International Journal of Environment and Pollution
96	2002	Glynn S.	Constructing a selection environment: Competing expectations for CFC alternatives	Cfc phase-out; Expectations; Innovation; Selection environments	While the concept of the 'selection environment' is one that is widely used, it is perhaps not that well understood. This paper examines in detail the context in which selection decisions are made through the study of the adoption of alternatives to CFCs. In doing so, close attention is paid to the differing expectations that are offered regarding what adoption of particular technologies means. D…	Research Policy
97	2002	[No author name available]	Life without nuclear		The decommissioning of Germany's 19 nuclear power plants was one of the main concessions the Green Party secured when it agreed to join Chancellor Gerhard Schröder's SPD ruling coalition after the 1998 general election. The government's energy policy, which will phase out nuclear power, is not expected to result in electricity shortfalls, either in the short or long term, and that the lost capaci…	Petroleum Economist
98	2002	Mukherjee A.B., Bhattacharya P.	Atmospheric emissions, depositions, and transformations of arsenic in natural ecosystem in Finland.		For the last 2 decades, special attention has been paid to arsenic due to its high concentration in groundwater in many regions of the globe. There are not very many reports on arsenic concentration in the Finnish ecosystem, although the metal has been known to be highly toxic since ancient times. For the majority of people in Finland, the leading exposure route to arsenic is through food consump…	TheScientificWorldJournal
99	2002	Finon D.	The mitigation of the French nuclear option: New industrial realism and	Cost; Externality; Nuclear energy; Policy process; Technological risk	Nuclear phase-out policies and the European obligation to liberalise electricity markets could put the French nuclear option dramatically at risk by influencing social preferences or by constraining power producers' investment choices in the future. So far, the particular institutional set-up which has allowed the efficient build- up and operation of several series of standardised reactors preser…	Energy and Environment
100	2002	van der Zwaan B.C.C.	Nuclear energy: Tenfold expansion or phase-out?	Carbon emissions; Global warming; Nuclear power; Sustainability	Today, consensus is strengthening that mankind ought to prevent atmospheric carbon dioxide concentrations from more than doubling, since such a doubling is likely to cause a significant interference with the planet's climate system, to which it might prove difficult to adapt. Nuclear energy possesses large disadvantages, among which waste, proliferation and safety. An expansion of nuclear energy …	Technological Forecasting and Social Change
101	2002	Achten C., Kolb A., Püttmann W.	Occurrence of methyl tert-butyl ether (MTBE) in riverbank filtered water and drinking water produced by riverbank filtration. 2		Bank filtration of river or lake water represents an efficient and natural purification process used for the drinking water production in many countries and at an amount of about 15-16% in Germany. From experiences over decades particularly at the river Rhine and Elbe, it is known that the occurrence of persistent pollutants in river water can represent a problem for the quality of drinking water…	Environmental Science and Technology
102	2002	Neupert D.	Clean-up time! PCB-filled transformers - environmental threat and commercial opportunity		Transformer oils based on polychlorinated biphenyls (PCBs) were widely used in industry up until the late 1970s, when it became apparent that PCBs build up in the environment and have the potential to be harmful. Bans on their use followed, so that many owners of electrical equipment containing PCBs now face the immense task of replacing their units in time to meet national deadlines for phasing …	ABB Review
103	2002	Giannakou I.O., Sidiropoulos A., Prophetou-Athanasiadou D.	Chemical alternatives to methyl bromide for the control of root-knot nematodes in greenhouses	Chemical control; Cucumber; Fumigants; Meloidogyne spp; Nematicides; Tomato	The complete phase-out of methyl bromide from use in developed countries by 1 January 2005 will cause many problems in agricultural industries that are now heavily reliant on its use. Three field experiments were established to compare management tactics on tomato and cucumber in commercial greenhouses naturally infested with root-knot nematodes (Meloidogyne spp). Reduction of nematode juveniles …	Pest Management Science
104	2002	Schafer K.S., Kegley S.E.	Persistent toxic chemicals in the US food supply		Persistent organic pollutants (POPs) have spread throughout the global environment to threaten human health and damage ecosystems, with evidence of POPs contamination in wildlife, human blood, and breast milk documented worldwide. Based on data from the US Food and Drug Administration, this article provides a brief overview of POPs residues in common foods in the United States food supply. The an…	Journal of Epidemiology and Community Health
105	2003	Siddiqi M.A., Laessig R.H., Reed K.D.	Polybrominated diphenyl ethers (PBDEs): new pollutants-old diseases.		Polybrominated diphenyl ethers (PBDEs) are a class of recalcitrant and bioaccumulative halogenated compounds that have emerged as a major environmental pollutant. PBDEs are used as a flame-retardant and are found in consumer goods such as electrical equipment, construction materials, coatings, textiles and polyurethane foam (furniture padding). Similar in structure to polychlorinated biphenyls (P…	Clinical medicine & research
106	2003	Michaelowa A.	Germany—a pioneer on earthen feet?	Germany; Greenhouse gas reductions; OECD countries	Germany is one of the two OECD countries having achieved substantial greenhouse gas reductions in the last decade. While a part was large reductions in industry after the economic crash in East Germany, a relevant share is due to the huge public infrastructure investments in East Germany. The real success of German climate policy in the past decade is the strong reduction of methane and nitrous o…	Climate Policy
107	2003	De Coster J.	Greenness costs a packet		The European Environment Commissioner, Margot Wallstrom, explained the need for a new chemicals policy to protect human health and the environment. The EC published a White Paper on the Strategy for a Future Chemicals Policy in February 2001 and proposals were drafted called REACH - Registration, Evaluation and Authorisation of Chemicals - now the subject of extensive consultation. Greater inform…	Textile Asia
108	2003	Petrov K.	Single hull tanker phase-out takes centre stage		A report on the issues discussed at the 49th session of IMO's Marine Environment Protection Committee was presented. The issues discussed included the recycling of ships, ballast water treatment, antifouling systems and the protection of fuel tanks. According to the report, the resistance to the proposed amendments barring single hull tankers from carrying heavy oils came from a number of North a…	Shipping World and Shipbuilder
109	2003	Santillo D., Johnston P.	Playing with fire: The global threat presented by brominated flame retardants justifies urgent substitution	Brominated flame retardants; Fire safety; Organic pollutants	Few would now deny that the use of organobromine compounds to achieve fire retardancy in a diverse array of products and materials has led to contamination of the ecosphere on a widespread scale. This environmental prevalence and persistence of the brominated flame retardants, coupled with growing evidence of their potential for harm, present all too familiar parallels with the previous generatio…	Environment International
110	2003	Von Storch H., Costa-Cabral M., Hagner C., Feser F., Pacyna J., Pacyna E., Kolb S.	Four decades of gasoline lead emissions and control policies in Europe: A retrospective assessment	Gasoline; Lead; Policy evaluation; Regional modelling; Retrospective analysis	Over decades, large amounts of the neurotoxin lead were released into the European environment, mostly from gasoline lead additives. Emissions were growing unabatedly until the 1970s, when a series of regulations on the allowed gasoline lead content were adopted. As a result, in the 1990s most gasoline contained only small amounts of lead. We have examined this case of environmental pollution and…	Science of the Total Environment
111	2003	Hodes G., Thomas V., Williams A.	A Strategy to Phase-Out Lead in African Gasoline		A strategy to phase-out lead in African Gasoline is presented. About 2.5 billion litres of ethanol is required to replace all of the lead used in gasoline in Africa. Ethanol blending affords Africa strategies for participating in international efforts to combat climate change.	Renewable Energy for Development
112	2003	Lundan S.M.	MULTINATIONALS, NGOs AND REGULATION: GREENPEACE AND THE GLOBAL PHASE-OUT OF CHLORINE BLEACHING		Empirical evidence from the past decade confirms that multinationals increasingly see the environment as a strategic issue, whether in terms of limiting damage to the bottom line from adverse publicity, or actually gaining in the marketplace by pioneering more environmentally conscious solutions. During the same period, NGOs have become a visible part of the political process, in influencing the …	Research in Global Strategic Management
113	2004	Mali P., Pulikesi M., Baskaralingam P., Kumar K.V., Ramamurthi V., Sivanesan S.	Global concern for the strategies phasing out of ozone depleting substances		The Montreal protocol on substances that deplete the Ozone layer is a landmark international agreement under the management of UNEP designed to protect the stratospheric Ozone layer. The treaty was originally signed in 1987. India is a party to Article 5 countries under the Montreal Protocol on Global Environment. India signed the Treaty in 1992. Consciousness of the world towards phasing out the…	Indian Journal of Environmental Protection
114	2004	Laes E., Meskens G., D'Haeseleer W., Weiler R.	Trust as a central paradigm for advisory science: The case of the Belgian nuclear phase-out	Decision-making; Nuclear energy; Sustainable development; Trust	The Belgian parliament has decided to phase out the existing nuclear power plants as part of the government's strategy to achieve sustainable development. According to the authors, this nuclear phase-out can be regarded as belonging to a class of unstructured problems in science for policy-making, i.e. problems where there exists a debate on the scientific facts as well as on the values at stake.…	International Journal of Sustainable Development
115	2004	Viklund M.	Energy policy options-from the perspective of public attitudes and risk perceptions	Attitudes; Electricity saving; Energy policy; Risk perception; Trust	In the present study a representative sample (N=797) of the Swedish population was surveyed, with regard to attitudes related to energy policy issues (e.g., environmental attitudes, risk perceptions, and attitudes towards different energy production systems), and self-reported electricity saving behavior. These factors were considered relevant in a Swedish energy policy context, due to the planne…	Energy Policy
116	2004	Tickner J., Geiser K.	The problem of current toxic chemicals management		In this article, we explore the limitations of current chemicals management policies worldwide and the evolution of new European, International and U.S. policies to address the problem of toxic chemicals control. It is becoming increasingly apparent that current chemicals management policies in Europe and the United States are inadequate. There is a general lack of toxicity and exposure informati…	New Solutions
117	2004	De Rooij C., Defourny C., Thompson R.S., Garny V., Lecloux A., Van Wijk D.	1,1,1-trichloroethane marine risk assessment with special reference to the osparcom region: North Sea	1,1,1-trichloroethane; Chlorinated compound; Environmental; Marine; Risk assessment	This risk assessment on 1,1,1-trichloroethane was carried out specifically for the marine environment, accordingly to the methodology laid down in the EU risk assessment Regulation (1488/94) and the Guidance Document of the EU New and Existing Substances Regulation (TGD, 1996). 1,1,1-trichloroethane is being phased out of most uses because of its ozone depletion potential (ODP) under the Montreal…	Environmental Monitoring and Assessment
118	2004	Veleva V., Sethi S.	The electronics industry in a new regulatory climate: Protecting the environment and shareholder value		With the adoption of the Waste Electrical and Electronic Equipment (WEEE) and Restriction of Hazardous Substances (RoHS) Directives in February 2003 and their coming into force in August 2005 and July 2006, respectively, the European Union has paved the way toward greater environmentaI responsibility and sustainability in the electronics industry. The directives require complete phase-out by July…	Corporate Environmental Strategy
119	2004	Thompson R.S., De Rooij C., Garny V., Lecloux A., Van Wijk D.	Carbon tetrachloride marine risk assessment with special reference to the osparcom region: North Sea	Carbon tetrachloride; Chlorinated compound; Environmental; Marine; Risk assessment	This risk assessment on carbon tetrachloride was carried out specifically for the marine environment, according to the methodology laid down in the European Union (EU) risk assessment Regulation (1488/94) and the Technical Guidance Documents for New and Existing Substances (TGD, 1996). The Montreal Protocol on ozone depleting substances scheduled a phase-out of carbon tetrachloride except for som…	Environmental Monitoring and Assessment
120	2004	Klein R.	Foam under fire		The risk reduction strategy by phasing out perfluorooctane sulphonate (PFOS) chemistry for the manufacture of fluoorosurfactants used in wide range of foam products is discussed. The Department for Environment, Food and Rural Affairs (DEFRA) identified PFOS based firefighting foams as a significant risk to the terrestrial and aquatic environment. The risk reduction strategy involves a conditional…	Fire Prevention and Fire Engineers Journals
121	2004	Breslin D.A., Wang Y.-L.	Climate Change, National Security, and Naval Ship Design		The Navy has a longstanding commitment to protect the environment while supporting military sustain-ability, operations, and readiness. While many environmental issues have the potential to affect Navy ships and operations, the Navy has traditionally taken a leadership role, as evidenced by the successful responses to the international bans on the production of ozone-depleting substances (ODSs) a…	Naval Engineers Journal
122	2004	Whiteley B.	Stock exchange		The provision of firefighting foam in the UK, which recommends that the perfluorooctane sulfonate (PFOS)-based foam should be phased-out with no effect on telomer-based foam, is discussed. The Department for Environment, Food and Rural Affairs (DEFRA) report recommends that all stocks of PFOS-based foams should be removed from service immediately and only used in an emergency where fire run-off i…	Fire Prevention and Fire Engineers Journals
123	2005	Particka C.A., Hancock J.F.	Field evaluation of strawberry genotypes for tolerance to black root rot on fumigated and nonfumigated soil	Breeding; Chloropicrin; Fragaria xananassa; Genotype x environment interaction; Methyl bromide; Pratylenchus penetrans; Pythium spp.; Rhizoctonia fragariae	Black root rot (BRR) is a widespread disease of strawberry (Fragaria xananassa Duchnesne) that causes the death of feeder roots and the degradation of structural roots. The major causal organisms of BRR include Rhizoctonia fragariae Husain and W.E. McKeen, Pythium Pringsh., and Pratylenchus penetrans (Cobb) Filipjev and Schuurmans Stekhoven. The current method of control for black root rot is met…	Journal of the American Society for Horticultural Science
124	2005	Katz S.A., Salem H.	Chemistry and toxicology of building timbers pressure-treated with chromated copper arsenate: A review	Building timber; CCA; Chromated copper arsenate; Wood preservatives	A recent agreement between the United States Environmental Protection Agency (USEPA) and the wood-treating industry will result in a phase-out of building timbers preserved with chromated copper arsenate (CCA). This agreement was motivated by a desire to reduce exposure to arsenic in the production, utilization and disposal of such material. The leaching of chromium, copper and arsenic from CCA-t…	Journal of Applied Toxicology
125	2005	Nordström A.H.	Sustainability in ABB		The strategies of ABB which is dedicated to fulfilling stakeholders' expectations with regard to the economic, social, and environmental performance are discussed. The company offers a broad range of products and systems that help customers improve performance while lowering their environmental impact. Presently, ABB is focusing on phasing out the use of hazardous substances in the manufacturing …	ABB Review
126	2005	Tickner J.A., Geiser K., Coffin M.	The U.S. experience in promoting sustainable chemistry	Chemicals policy; Green chemistry; REACH (Registration, Evaluation and Authorization of Chemicals); Sustainable chemistry; Toxic Substances Control Act (TSCA); U.S. experience in promoting sustainable chemistry	Background, Aim and Scope. Recent developments in European chemicals policy, including the Registration, Evaluation and Authorization of Chemicals (REACH) proposal, provide a unique opportunity to examine the U.S. experience in promoting sustainable chemistry as well as the strengths and weaknesses of existing policies. Indeed, the problems of industrial chemicals and limitations in current regul…	Environmental Science and Pollution Research
127	2005	Holmström K.E., Järnberg U., Bignert A.	Temporal trends of PFOS and PFOA in guillemot eggs from the Baltic Sea, 1968-2003		Perfluorooctane sulfonic acid (PFOS) and perfluorooctanoic acid (PFOA) have recently been identified as ubiquitous environmental contaminants. Although they have been produced for 50 years, little is known about when they first appeared in the environment and how their concentrations have changed over time, particularly in response to the phase-out of PFOS, which began in 2000. In this study temp…	Environmental Science and Technology
128	2005	Van Der Velde W.	The position of coastal States and casualty ships in international law		Many unanswered questions about the rights and duties of a coastal State in respect of casualty ships have been revealed due to the sinking of the 'Prestige'. When a ship requests refuge it means access to the internal waters or a port in the internal waters of a State is meant. In order to make trade secure and economical, the right of innocent passage has been created as an exception to the Sta…	TMA - Tijdschrift voor Milieuschade en Aansprakelijkheidsrecht
129	2005	Nitz F., Prasad K.	Call of conscience: Say 'no' to CTC		Carbon Tetrachloride (CTC) has been widely used as chemical in the garment industry as a stain removal, and as a result is posing threats to environment, by affecting the ozone layer. India, under the Montreal Protocol, is attempting systematic phasing out of CTC by 2010 in a bid to safeguard the earth. Thinning of ozone layer means more absorption of ultraviolet radiations (UV), and these UV ray…	Indian Silk
130	2005	Lejano R.P., Ericson J.E.	Tragedy of the temporal commons: Soil-bound lead and the anachronicity of risk		In 2002, a team of researchers from the University of California, Irvine collaborated with the community of Pacoima, California around a co-ordinated effort to analyze soil around the neighborhood for lead. The team found both total and bioavailable lead to be markedly higher in areas close to major highways, almost 20 years after leaded gasoline had been completely phased out. Multi-regression a…	Journal of Environmental Planning and Management
131	2005	Laes E., D'Haeseleer W., Weiler R.	Addressing uncertainty and inequality in nuclear policy	Decision making; Nuclear energy industry; Risk assessment; Sustainable development	Purpose - This paper analyses the justification of technological choices and options in the context of nuclear energy policy. We argue that "society" increasingly demands a justification with regard to the level of uncertainty and inequality a certain technological choice induces. We aim to demonstrate that policy makers in fact do address these issues, but depending on how they define the proble…	Journal of Enterprise Information Management
132	2005	[No author name available]	HFC crisis averted		The environment committee of the European Parliament had called for a series of selective bans on F-gases including the use of HFC refrigerants in stationary air conditioning and commercial and industrial refrigeration from Jan 2010. Industry members were alarmed at the prospect of an accelerated timetable for phasing out HFCs with FETA director general Cedric Sloan particularly damning the envir…	HAC
133	2006	Hirota K.	Review of Lead Phase Out for Air Quality Improvement in the Third World Cities Lessons from Thailand and Indonesia	Air Pollution; Asia; Coordination; Regulatory Policy; Sustainability	Due to the rapid economic growth, and increase of motor vehicle ownerships in Asian countries, people are suffering from serious air pollution problems, especially in large cities. There has been a worldwide movement to eliminate lead from gasoline since the 1970s. In accordance with lead elimination from gasoline, the concentration of lead in air and its health impact have also decreased. This p…	Studies in Regional Science
134	2006	Di Nucci M.R.	The nuclear power option in the Italian energy policy	Energy policy; Italy; Nuclear power	Italy took a pioneering role in the early development of nuclear power. This source of energy should have provided the answer to the lack of domestic fossil resources. Due to the cheap oil prices, the influence of the state hydrocarbons company ENI and an influential petroleum lobby, following the nationalisation of the electricity sector in the early sixties, the nuclear option was no longer con…	Energy and Environment
135	2006	Leem S.-J.	Unchanging vision of nuclear energy: Nuclear power policy of the South Korean Government and citizens' challenge	Anti-nuclear movements; Energy policy; Nuclear power; South Korea	This article reports on the status and perspectives of South Korea's nuclear power policy, enabling a discussion regarding how much of South Korea's nuclear and energy policy has changed. Despite the phase-out or slowdown of nuclear industry in European countries, the Korean Government continues to maintain a traditional energy policy paradigm, expanding nuclear energy continuously in essence for…	Energy and Environment
136	2006	Kanagawa M., Nakata T.	Analysis of the impact of electricity grid interconnection between Korea and Japan - Feasibility study for energy network in Northeast Asia	Electricity grid interconnection; Energy system; Energy-economic model	This study analyzes the impact of an electricity grid interconnection between Korea and Japan on their energy systems. Both countries seriously consider energy security as the most important policy issue because of a lack of domestic energy resources. In addition, public concern for the environment is recently rising up in response to the global warming. Electricity grid interconnection has stron…	Energy Policy
137	2006	Jonsson A., Hillring B.	Planning for increased bioenergy use-Evaluating the impact on local air quality	Benzene; Bioenergy; Combustion; Dispersion modelling; Environmental impacts; GIS; Pellet; PM10; Small scale; Woodfuel	The Swedish energy system is undergoing a transformation due to threats about climate change and political decisions to reduce green house gases and to phase out the nuclear power. The goal is to convert the energy system from a system based on fossil fuels and nuclear power to one based on renewable energy sources. Bioenergy is an available domestic, renewable, carbon dioxide neutral energy sour…	Biomass and Bioenergy
138	2006	Hennicke P., Fischedick M.	Towards sustainable energy systems: The related role of hydrogen	Energy efficiency; Hydrogen; Sustainable energy systems	The role of hydrogen in long run sustainable energy scenarios for the world and for the case of Germany is analysed, based on key criteria for sustainable energy systems. The possible range of hydrogen within long-term energy scenarios is broad and uncertain depending on assumptions on used primary energy, technology mix, rate of energy efficiency increase and costs degression ("learning effects"…	Energy Policy
139	2006	Tsai W.T.	Energy and environmental policies relating to hydrofluorocarbons (HFCs) emissions mitigation and energy conservation in Taiwan	Energy policy; Environmental policy; Hydrofluorocarbons (HFCs); Promotion measure; Regulation	Greenhouse gases (GHGs) emissions are becoming significant energy and environmental issues relating to energy consumption in Taiwan. The nation, although not a party to the Montreal Protocol and Kyoto Protocol, has diligently strived to mitigate the emissions and phase out use of the responsible materials. Hydrofluorocarbons (HFCs), which are now mostly used in refrigeration and air conditioning …	Energy Conversion and Management
140	2006	Singh A.K., Singh M.	Lead decline in the Indian environment resulting from the petrol-lead phase-out programme	Children blood-lead; Dalbergia sissoo; Ganga River; India; Lead; Unleaded petrol	Recently, the lead content of various environmental components has decreased in response to replacement of leaded petrol by unleaded petrol. In India, 15 research studies are here assessed with respect to lead concentrations in various environmental components during the leaded petrol phase (before 1996), the transitional phase (1996-2000) and the unleaded petrol phase (2000 onwards). The Ganga R…	Science of the Total Environment
141	2006	Sundstrom R., Åström M.	Characterization of the metal leakage from Finnish agricultural acid sulphate soils in the light of the European Water Framework Directive		On the coastal plains of Finland, widespread acid sulphate soils have developed as a result of agricultural drainage activities and constitute a massive supplier of metals and acidic compounds to the aquatic environment. As a consequence, the aquatic life (fish, etc.) is seriously damaged in many water courses. The EU Water Framework Directive (WFD) which came into force in December 2000, sets ne…	Boreal Environment Research
142	2006	Lal R.A.	Impacts of rapid economic growth on environment		The environment is being discussed through various national and international fronts for a long time. However, little has been done to meet the commitments and resolutions adopted in such gatherings. In 1991, NASA discovered that ozone layer depletion during the last one decade was 4.5-5%, which is more than double the estimated depletion. Countries signatory to Montreal Protocol had agreed to ph…	Colourage
143	2006	Hanson B.D., Shrestha A.	Weed control with methyl bromide alternatives	Barrier films; Fumigants; Herbicides; Integrated pest management; Methyl bromide alternatives; Non-chemical control	Methyl bromide (MeBr) has been used for several decades for preplant (PRE) soil fumigation in high-value agricultural and horticultural crops because it can provide broad-spectrum control of insects, nematodes, pathogens, and weeds. However, MeBr has been identified as an ozone-depleting chemical and is associated with hazards to human heath, plants, and animals. Therefore, a global agreement to …	CAB Reviews: Perspectives in Agriculture, Veterinary Science, Nutrition and Natural Resources
144	2006	Santos B.M., Gilreath J.P.	Chemical alternatives to methyl bromide for vegetable crop production in Florida, United States	1,3-dichloropropene; Chloropicrin; Dimethyl disulfide; Metam; Methyl iodide; Nematodes; Propylene oxide; Soil-borne diseases; Weeds	Vegetable crop production in Florida, USA, relies on planting on polyethylene-mulched beds fumigated with methyl bromide plus chloropicrin (MBr+Pic) for soil-borne disease, nematode and weed control. However, MBr for agricultural use has been phased out because it is an ozone-depleting molecule. A considerable amount of research has been conducted to identify alternatives to MBr in Florida, where…	CAB Reviews: Perspectives in Agriculture, Veterinary Science, Nutrition and Natural Resources
145	2006	Schumacher K., Sands R.D.	Innovative energy technologies and climate policy in Germany	Climate policy; CO2 capture and storage; General equilibrium modeling	Due to the size and structure of its economy, Germany is one of the largest carbon emitters in the European Union. However, Germany is facing a major renewal and restructuring process in electricity generation. Within the next two decades, up to 50% of current electricity generation capacity may retire because of end-of-plant lifetime and the nuclear phase-out pact of 1998. Substantial opportunit…	Energy Policy
146	2006	Valmas N., Ebert P.R.	Comparative toxicity of fumigants and a phosphine synergist using a novel containment chamber for the safe generation of concentrated phosphine gas		Background. With the phasing out of ozone-depleting substances in accordance with the United Nations Montreal Protocol, phosphine remains as the only economically viable fumigant for widespread use. However the development of high-level resistance in several pest insects threatens the future usage of phosphine; yet research into phosphine resistance mechanisms has been limited due to the potentia…	PLoS ONE
147	2006	Patrick L.	Lead toxicity, a review of the literature. Part I: Exposure, evaluation, and treatment		The phasing out of leaded gasoline for transportation vehicles between 1973 and 1995 and the removal of lead from paint by federal mandate by 1978 have resulted in substantial lowering of mean blood lead levels in all segments of the U.S. population. However, because lead is a persistent metal, it is still present in the environment-in water, brass plumbing fixtures, soil, dust, and imported prod…	Alternative Medicine Review
148	2006	Matthiessen J., Kirkegaard J.	Biofumigation and enhanced biodegradation: Opportunity and challenge in soilborne pest and disease management	Biofumigation; Brassica; Disease; Enhanced biodegradation; Glucosinolate; Isothiocyanate; Metam sodium; Methyl bromide; Pest; Soil	Management of soilborne pests and diseases in cropping systems is often highly challenging - in implementation of acceptable methodologies and in dealing with secondary problems. The phase-out of methyl bromide brings this into particularly sharp focus. There is a need for diversified options and alternatives to fill different roles across the soilborne pest and disease management spectrum, but f…	Critical Reviews in Plant Sciences
149	2006	Wood A.	Who's your regulator?		Different aspects of regulation in the chemical industry by the European Union are discussed. There is a lot of concern about inherently safer technologies, the requirement for a switch to safer products or processes if either is deemed to exist and this rule is likely under the European Union's Registration, Evaluation and Authorization of Chemicals (Reach) legislation. Wal-Mart launched a progr…	Chemical Week
150	2006	Hänninen S., Rytkönen J.	Transportation of liquid bulk chemicals by tankers in the Baltic Sea	Baltic Sea; Chemical transport; Chemicals; Environmental impacts; Harbours; Maritime transport; Pollution; Ports; Safety; Tankers	While gathering information about oil transportation for VTT Publication 547, Oil transportation and terminal development in the Gulf of Finland (2004), the question about other harmful substances transported in liquid bulk was raised. The Finnish Ministry of the Environment, Finnish Environment Institute (SYKE) and Finnish Maritime Administration (FMA) have made it possible for us to continue th…	VTT Publications
151	2006	Rojas-Bracho L., Reeves R.R., Jaramillo-legorreta A.	Conservation of the vaquita Phocoena sinus	By-catch; Cetacean; Criticallyen dangered; Gulfof California; Mexico; Porpoise	1. The vaquita Phocoena sinus is a small porpoise that is endemic to the northern Gulf of California, Mexico. It is the most critically endangered marine small cetacean in the world. The most precise estimate of global abundance based on a 1997 survey is 567 (95% CI 177-1073). 2. Vaquitas mainly live north of 30°45′N and west of 114°20′W. Their 'core area'consists of about 2235 km2 centred around…	Mammal Review
152	2007	Sadasivaiah S., Tozan Y., Breman J.G.	Dichlorodiphenyltrichloroethane (DDT) for indoor residual spraying in Africa: How can it be used for malaria control?		In 2006, the World Health Organization issued a position statement promoting the use of indoor residual spraying (IRS) with dichlorodiphenyltrichloroethane (DDT) for malaria vector control in epidemic and endemic areas. Other international organizations concurred because of the great burden of malaria and the relative ineffectiveness of current treatment and control strategies. Although the Stock…	American Journal of Tropical Medicine and Hygiene
153	2007	Andrady A., Aucamp P.J., Bais A.F., Ballaré C.L., Björn L.O., Bornman J.F., Caldwell M., Cullen A.P., Erickson D.J., De Gruijl F.R., Häder D.-P., Ilyas M., Kulandaivelu G., Kumar H.D., Longstreth J., McKenzie R.L., Norval M., Paul N., Redhwi H.H., Smith R.C., Solomon K.R., Sulzberger B., Takizawa Y., Tang X., Teramura A.H., Torikai A., Van Der Leun J.C., Wilson S.R., Worrest R.C., Zepp R.G.	Environmental effects of ozone depletion and its interactions with climate change: Progress report, 2007		This year the Montreal Protocol celebrates its 20th Anniversary. In September 1987, 24 countries signed the 'Montreal Protocol on Substances that Deplete the Ozone Layer'. Today 191 countries have signed and have met strict commitments on phasing out of ozone depleting substances with the result that a 95% reduction of these substances has been achieved. The Montreal Protocol has also contributed…	Photochemical and Photobiological Sciences
154	2007	Brooke J.	Briefing: Implementation and implications of water framework directive	Environment; European Union (EU); Maritime engineering	The European Union (EU) Water Framework Directive (WFD), which was transposed into law in most member states in 2003, introduces a new, integrated regime of protection, improvement and management to all water bodies. These include rivers and canals, coastal and estuarine waters and, in some countries, large marine areas. The WFD also aims to prevent further deterioration in water status and to re…	Proceedings of the Institution of Civil Engineers: Maritime Engineering
155	2007	Roma-Torres J., Silva S., Costa C., Coelho P., Henriques M.A., Teixeira J.P., Mayan O.	Lead exposure of children and newborns in Porto, Portugal	Blood lead levels; Children; Exposure; Foetus; Gasoline; Lead	Lead is a naturally occurring element that has multipurpose applications and has been used since early civilizations being widespread in the environment. Lead is not biodegradable and its continual use has contaminated air, water, and soil. It is highly toxic affecting the whole body and is particularly harmful to newborns and children, adversely affecting cognitive development and behaviour. For…	International Journal of Hygiene and Environmental Health
156	2007	Sissell K.	Canada seeks accelerated HCFC phaseout		Canada's environment minister has said that the nations that have signed the Montreal Protocol treaty should agree to phase out hydrochlorofluorocarbons (HCFC) about 10 years earlier than planned. The treaty calls for these nations to eliminate HCFCs by 2030 and for developing nations to follow suit by 2040. HCFCs are less harmful to the ozone layer than CFCs, but they have been identified as pot…	Chemical Week
157	2007	Bryner M.	DOJ clears DuPont of criminal charges in PFOA probe		The U.S. Department of Justice (DOJ) will not pursue criminal charges against DuPont for the company's research and use of perfluorooctanoic acid (PFOA) at its Parkersburg, WV facility. The DOJ's subpoena had prompted DuPont shareholders to petition the Securities and Exchange Commission to look into whether DuPont is suppressing financially relevant information from investors. PFOA is persistent…	Chemical Week
158	2007	Karimi M.N., Haleem A.	Indian implementation of alternative refrigerant technology: A dynamic analysis	Modelling of CFC refrigerant; Montreal protocol implementation; Ozone depleting substance phase-out; Refrigeration and air-conditioning; System dynamics	In this communication, the dynamic behaviour of implementation of new non-ODS (Ozone Depleting Substance) technology for domestic refrigerator and car air-conditioning sector of India has been considered. Protocols formed under the guidance of the.environment program based on research findings, are international market bindings between developed nations and developing nations. India signed the Mo…	Global Journal of Flexible Systems Management
159	2007	Kierkegaard S.	Charging up the batteries: Squeezing more capacity and power into the new EU Battery Directive		The pace of technological change with computers is creating a problematic scenario on what to do with the growing amount of electronic waste. E-junk is the fastest growing waste stream and the threat from spent batteries is growing as the volume in landfills grows. Batteries contain heavy metals or potentially toxic substances which pose dangers to human health and the environment. Environmentali…	Computer Law and Security Report
160	2007	Etherington L.L., Hooge P.N., Hooge E.R., Hill D.F.	Oceanography of Glacier Bay, Alaska: Implications for biological patterns in a glacial fjord estuary		Alaska, U.S.A, is one of the few remaining locations in the world that has fjords that contain temperate tidewater glaciers. Studying such estuarine systems provides vital information on how deglaciation affects oceanographic conditions of fjords and surrounding coastal waters. The oceanographic system of Glacier Bay, Alaska, is of particular interest due to the rapid deglaciation of the Bay and …	Estuaries and Coasts
161	2007	Butt C.M., Muir D.C.G., Stirling I., Kwan M., Mabury S.A.	Rapid response of arctic ringed seals to changes in perfluoroalkyl production		Temporal trends in perfluoroalkyl compounds (PFCs) were investigated in liver samples from two ringed seal (Phoca hispida) populations in the Canadian Arctic, Arviat (Western Hudson Bay) (1992, 1998, 2004, 2005) and Resolute Bay (Lancaster Sound) (1972, 1993, 2000, 2004, 2005). PFCs analyzed included C 7-C15 perfluorinated carboxylates (PFCAs) and their suspected precursors, the 8:2 and 10:2 fluo…	Environmental Science and Technology
162	2007	Tsai W.T.	Bioenergy from landfill gas (LFG) in Taiwan	Bioenergy; Emission estimation; Energy policy; Landfill gas; Promotion measure	Greenhouse gases (GHGs) emissions are becoming significant energy and environmental issues relating to municipal solid waste (MSW) deposited in landfills in Taiwan. The nation, although not a Party to the Montreal Protocol and Kyoto Protocol, has diligently striven to mitigate and phase out them. The landfill gas (LFG), which is now considered as a renewable energy with emphasis on electricity ge…	Renewable and Sustainable Energy Reviews
163	2007	Johansson P., Nylander A., Johnsson F.	Primary energy use for heating in the Swedish building sector-Current trends and proposed target	Building sector; Heating; Primary energy	One goal of the Swedish energy policy is to reduce the amount of electricity used for heating in the building sector. This means to reduce the primary energy used for heating which in this paper is analyzed in the context of various heating technologies and CO2 emissions. The analysis is applied to a region in Sweden (southern Sweden) for which detailed information on the energy infrastructure (t…	Energy Policy
164	2007	Kim K.-H.	Airborne lead concentration levels on the Korean peninsula between 1991 and 2004	Atmospheric; Industrial emission; Korea; Lead (Pb); Spatial	In this study, a comprehensive analysis was made to describe the environmental behavior and pollution status of lead (Pb) in 13 major cities in Korea in a 14-year time span (1991-2004). The results clearly indicate that spatial distribution of Pb is clearly distinguished between different city types and between different temporal intervals. The Pb concentration levels in the cities of strong indu…	Atmospheric Environment
165	2007	Kiewnick S.	Practicalities of developing and registering microbial biological control agents	Biological control; Fermentation; Formulation; Production; Registration	There is considerable interest in the exploitation of microbial biological control agents (MBCAs) for the control of crop pests, weeds and diseases. MBCAs can be used where chemical pesticides are banned or being phased out or where pests have developed resistance to standard chemicals. The use of MBCAs can play an important role in crop protection, as a key element in integrated pest management …	CAB Reviews: Perspectives in Agriculture, Veterinary Science, Nutrition and Natural Resources
166	2007	Dȩbski B., Kania B.F., Kuryl T.	Transformations of diazinon, an organophosphate compound in the environment and poisoning by this compound	Decomposition; Diazinon; Environmental pollution; Toxicity	Diazinon, an organophosphate insecticide, is a potent blocker of acetyl-cholinesterase (AChE) in the blood and in tissues. Diazinon is commonly used as an insecticide in agriculture, home and gardens. Possible poisoning of the environment by the transfer of the compound to the underground water should be dangerous for water organisms. The rate of diazinon decomposition depends on physical propert…	Ekologia Bratislava
167	2007	Hekkenberg M., Schoot Uiterkamp A.J.M.	Exploring policy strategies for mitigating HFC emissions from refrigeration and air conditioning	Air conditioning; Global warming; Refrigeration; Scenario study; Stock-flow; System dynamics	The growing demand for cooling throughout the world, possibly increased by global climate change, requires the implementation of policies to mitigate the related greenhouse gas (GHG) emissions from energy and refrigerant use in the refrigeration and air conditioning (RAC) sector. This article aims to contribute to the discussion on strategies to reduce HFC emissions from RAC by looking at their d…	International Journal of Greenhouse Gas Control
168	2007	Jones B., Bolam T.	Copper speciation survey from UK marinas, harbours and estuaries	Copper; Estuaries; Harbours; Labile copper; Marinas; Total dissolved copper	The use of copper in antifouling paints has increased in the UK in the last 20 years as TBT and several other organic biocides have been phased out. To assess the probable impact of copper on estuarine systems a survey was undertaken to measure the different fractions of copper present in the water column at current usage. The different fractions measured were; labile copper, (LCu) considered as …	Marine Pollution Bulletin
169	2007	DeCanio S.J., Norman C.S.	Economics of "essential use exemptions" for metered-dose inhalers under the Montreal Protocol	CFCs; Essential use exemptions; Metered-dose inhalers; Montreal Protocol; Public health consequences of environmental regulation; Stratospheric ozone layer	The Montreal Protocol on Substances that Deplete the Ozone Layer has led to rapid reductions in the use of ozone-depleting substances worldwide. However, the Protocol provides for "essential use exemptions" (EUEs) if there are no "technically and economically feasible" alternatives. An application that might qualify as an "essential use" is CFC-powered medical metered-dose inhalers (MDIs) for the…	Journal of Environmental Management
170	2007	Duzgoren-Aydin N.S.	Sources and characteristics of lead pollution in the urban environment of Guangzhou	China; Guangzhou; Pb contamination; Pb isotope composition; Urban dusts; Urban geochemistry	Guangzhou, the capital of the southeastern province of Guangdong, is one of the largest and most rapidly developing industrial cities in China. In recent years its rapid economic development has brought great prosperity to the Pearl River Delta (PRD) region, but has also given rise to a wide variety of environmental problems. The current level of lead (Pb) contamination (75-926 mg/kg) in the surf…	Science of the Total Environment
171	2007	Middleton N.	Environment today: Unleaded petrol		Since 1920s, lead has been added to petrol to increase the output of power from the internal combustion engine. However, lead has a significant impacts to the environment as well as to human health. Addressing the leaded fuel issue, the first countries to do the phase-in unleaded fuel and gradually phase-out leaded petrol are Japan, the USA, Canada, Australia and many western European countries. …	Geography Review
172	2007	Easthope T., Valeriano L.	Phase out persistent, bioaccumulative or highly toxic chemicals		Chemicals such as lindane, lead compounds, and some brominated flame retardants and organophosphate pesticides are examples of persistent, bioaccumulative, and/or highly toxic chemicals that continue to be used in commerce, although strong evidence exists that they pose threats to human and ecosystem health. These and other chemicals, by virtue of their characteristics, are very difficult to mana…	New Solutions
173	2007	Thorpe B., Rossi M.	Require safer substitutes and solutions: Making the substitution principle the cornerstone of sustainable chemical policies		Currently, chemical regulations in the United States do not prioritize the production and use of inherently safe chemicals. At present, when regulations get passed to target a chemical for control, safer substitutes are not the goal nor are there specific guidelines or tools used to achieve Green Chemistry, Clean Production, or sustainable product design. In most cases, the replacement is often j…	New Solutions
174	2007	Ashiabor H., Blazey P.	Phasing out detrimental ecological subsidies in the fossil fuel sector: Challenges and prospects for the Asia Pacific Region	Emissions trading; Environmental externalities; Environmental taxes; Renewable energy; Subsidies	The rapid industrialisation in the Asia-Pacific Region has brought about an unprecedented increase in the consumption of energy to power the economic growth that has been created in its wake. This has in turn raised security of supply issues relating to the sustainability of fossil fuel sources and concerns about the negative environmental externalities of fossil fuel use such as greenhouse gas e…	Asia Pacific Journal of Environmental Law
175	2007	Connell D.W., Miller G.J., Anderson S.M.	Chapter 17 Persistent Organic Pollutants: Occurrence and Health Risks in Australia		The major persistent organic pollutants (POPs) in Australia are the persistent organochlorine pesticides (OCPs). The adverse effects of DDT were first recognised in Australia in the late 1960s. Subsequently, the Australian Government introduced a policy of phasing out the registered uses of this major pesticide and related substances so that their use in agriculture ceased by 1987. Australian foo…	Developments in Environmental Science
176	2008	Martinsen D., Krey V.	Duplicate row 173 (code this only) Compromises in energy policy-Using fuzzy optimization in an energy systems model	Energy model; Energy policy compromise; Fuzzy optimization	Over the last year in Germany a great many political discussions have centered around the future direction of energy and climate policy. Due to a number of events related to energy prices, security of supply and climate change, it has been necessary to develop cornerstones for a new integrated energy and climate policy. To supplement this decision process, model-based scenarios were used. In this…	Energy Policy
177	2008	Ladner D.C., Tchounwou P.B., Lawrence G.W.	Evaluation of the effect of ecologic on root knot nematode, Meloidogyne incognita, and tomato plant, Lycopersicon esculenum	Agricultural management; Ecologic chitin; Root knot nematode; Tomato plant	Nonchemical methods and strategies for nematode management including cultural methods and engineered measures have been recommended as an alternative (GT is strategy/consequence not objective) to methyl bromide (a major soil fumigant), due to its role in the depletion of the ozone layer. Hence, an international agreement has recently been reached calling for its reduced consumption and complete p…	International Journal of Environmental Research and Public Health
178	2008	Mañay N., Cousillas A.Z., Alvarez C., Heller T.	Lead contamination in Uruguay: the "La Teja" neighborhood case.		Lead, ubiquitous in the environment as a result of mining and industrialization, is found as a contaminant in humans although it has no known physiological function there. Lead-exposed children are known to be the population with the highest potential health risks. The recommended biomarker to assess environmental lead exposure in animals is lead level in blood. Before 2001, the Department of Tox…	Reviews of environmental contamination and toxicology
179	2008	Mathews J.A.	Biofuels, climate change and industrial development: Can the tropical South build 2000 biorefineries in the next decade?	Biofuels; Biopact; Climate change	Biofuels are important because they span three of the greatest issues of our time-world industrial development; energy security and the transition to a bioeconomy; and global warming. Biofuels have something important to contribute as a solution in each of these three areas-without being a 'magic bullet' or the whole of the solution in any of them. Indeed, biofuels may be a transitory solution th…	Biofuels, Bioproducts and Biorefining
180	2008	Candido V., D'Addabbo T., Basile M., Castronuovo D., Miccolis V.	Greenhouse soil solarization: Effect on weeds, nematodes and yield of tomato and melon	Melon; Nematodes; Solarization; Tomato; Weeds; Yield	Phase-out of methyl bromide and health concerns related to the use of pesticides are increasing the interest in alternative control strategies. Soil solarization is an effective, safe and cheap technique for the control of soil-borne pathogens and weeds. However, knowledge of the long-term effects of solarization, as well as of repeated solarization cycles, is scarce. Such knowledge should in par…	Agronomy for Sustainable Development
181	2008	Wang H., Brown S.L., Magesan G.N., Slade A.H., Quintern M., Clinton P.W., Payn T.W.	Technological options for the management of biosolids	Anaerobic digestion; Bioenergy; Biosolids; Cocombustion; Energy recovery; Land application; Phosphorus recovery; Sewage sludge; Waste	Background, aim, and scope: Large quantities of biosolids (sewage sludge), which are produced from municipal wastewater treatment, are ever-increasing because of the commissioning of new treatment plants and continuous upgrades of the existing facilities. A large proportion of biosolids are currently landfilled. With increasing pressure from regulators and the general public, landfilling of bioso…	Environmental Science and Pollution Research
182	2008	Omer A.M.	Green energies and the environment	Green energy technologies; Mitigation measurements; Sustainable development	Globally, buildings are responsible for approximately 40% of the total world annual energy consumption. Most of this energy is for the provision of lighting, heating, cooling, and air conditioning. Increasing awareness of the environmental impact of CO2 and NOx emissions and CFCs triggered a renewed interest in environmentally friendly cooling, and heating technologies. Under the 1997 Montreal Pr…	Renewable and Sustainable Energy Reviews
183	2008	Omer A.M.	Power, people and pollutions	Energy potential; Environment; Future prospect; Sudan	The harsh climate in Sudan presents unique challenges in meeting growing demands for power and water. The international demand of water increases compared to the available water resources, due to recent development water resources for different uses. In many areas especially in Red Sea areas, there is serious a shortage of potable water. These areas are enjoyed with a high intensity of solar ener…	Renewable and Sustainable Energy Reviews
184	2008	Kharecha P.A., Hansen J.E.	Implications of "peak oil" for atmospheric CO2 and climate		Unconstrained CO2 emission from fossil fuel burning has been the dominant cause of observed anthropogenic global warming. The amounts of "proven" and potential fossil fuel reserves are uncertain and debated. Regardless of the true values, society has flexibility in the degree to which it chooses to exploit these reserves, especially unconventional fossil fuels and those located in extreme or pris…	Global Biogeochemical Cycles
185	2008	Mason D., Jones L., Ryall J., Nuthall K.	Shipping: Environment: Worldwide efforts to tackle tanker pollution		The IMO's MARPOL anti-pollution convention is well on the way to phasing out single hull tankers by 2010 and these ships have been blocked from entering EU ports since 2003. With increasing demands to reduce liquid and air pollution emissions from sea-going vessels, the pressure on shipbuilders to build safer and cleaner ships is growing. A discussion covers EU's collaborative CREATING project, w…	Petroleum Review
186	2008	Omer A.M.	Energy, environment and sustainable development	Energy; Environment; Global warming; Sustainable development	Globally, buildings are responsible for approximately 40% of the total world annual energy consumption. Most of this energy is for the provision of lighting, heating, cooling, and air conditioning. Increasing awareness of the environmental impact of CO2 and NOx emissions and CFCs triggered a renewed interest in environmentally friendly cooling, and heating technologies. Under the 1997 Montreal Pr…	Renewable and Sustainable Energy Reviews
187	2008	Croteau M.C., Davidson M.A., Lean D.R.S., Trudeau V.L.	Global increases in ultraviolet B radiation: Potential impacts on amphibian development and metamorphosis		Levels of ultraviolet B radiation (UVBR) reaching the Earth's surface have increased since the 1970s as a result of stratospheric ozone depletion caused by the emission of ozone-depleting substances (ODSs) such as chlorofluorocarbons. Despite international agreements to phase out harmful ODSs, these substances are persistent, and even under the most optimistic scenarios, stratospheric ozone level…	Physiological and Biochemical Zoology
188	2008	Wellmer F.	Reserves and resources of the geosphere, terms so often misunderstood. Is the life index of reserves of natural resources a guide to the future? [Reserven und ressourcen der geosphäre, begriffe, die so häufig missverstanden werden. ist die reichweite der reserven von natürlichen ressourcen ein hinweis für die zukunft?]	Estimated ultimate recovery (eur) of crude oil; Feedback control system of raw materials supply; Geopotential; Lifetime of reserves; Peak oil; Price; Replacement of functions; Reserve/consumption (r/c) ratios; Reserves; Resources; Sustainable development	Against the background of the climate change discussion worldwide, especially in the industrialized countries, connected with efforts to increase the share of renewable energies and in Germany the plan to phase out nuclear power generation, the issue of the lifetimes of fossil energy and uranium resources is presently widely discussed. At the same time a more technical discussion takes place abou…	Zeitschrift der Deutschen Gesellschaft fur Geowissenschaften
189	2008	Khazova M., O'Hagan J.B.	Optical radiation emissions from compact fluorescent lamps		There is a drive to energy efficiency to mitigate climate change. To meet this challenge, the UK Government has proposed phasing out incandescent lamps by the end of 2011 and replacing them with energy efficient fluorescent lighting, including compact fluorescent lamps (CFLs) with integrated ballasts. This paper presents a summary of an assessment conducted by the Health Protection Agency in Marc…	Radiation Protection Dosimetry
190	2008	Braun H.	The phoenix project: Shifting to a solar hydrogen economy by 2020	Climate change; Exponential growth; Hydrogen; Hydrogen economy; Wind energy	The most serious energy, economic and environmental problems are related to the use of fossil and nuclear fuels, which are rapidly diminishing and highly polluting, and many distinguished atmospheric chemists, including Dr. James Hanson at NASA, Dr. Steven Chu, the director of Lawrence Livermore Laboratory, and Professor Ralph Cicerone, president of the National Academy of Sciences have documente…	Chemical Industry and Chemical Engineering Quarterly
191	2009	Torres J.P.M., Lailson-Brito J., Saldanha G.C., Dorneles P., e Silva C.E.A., Malm O., Guimarães J.R., Azeredo A., Bastos W.R., da Silva V.M.F., Martin A.R., Cláudio L., Markowitz S.	Persistent toxic substances in the Brazilian Amazon: Contamination of man and the environment	Amazon; DDT; Inia geoffrensis; POPs	The organochlorine insecticide DDT was extensively used in Brazil since 1945, both for agricultural purposes and for vector control measures. In 1986 its uses were forbidden in agriculture and in 1997 it was also phased-out in vector controls programs. However, the presence of DDT in urban and forested soils, breast milk and aquatic biota is still common, especially at the Amazon region. The resu…	Journal of the Brazilian Chemical Society
192	2009	Weiss G.	End game for carbon in Australia		The release of the White Paper on the Australian Carbon Pollution Reduction Scheme (CPRS) by the country's minister for climate change represents the policy on carbon trading in Australia. Australian Greenhouse Office proposes some significant energy efficiency measures like phasing out of incandescent lights and support for low- or reduced-carbon technologies. Low carbon technologies include cle…	Chemical Engineer
193	2009	Vollmer M.K., Zhou L.X., Greally B.R., Henne S., Yao B., Reimann S., Stordal F., Cunnold D.M., Zhang X.C., Maione M., Zhang F., Huang J., Simmonds P.G.	Emissions of ozone-depleting halocarbons from China		National emission inventories of ozone-depleting substances (ODS) play a key role in the control mechanisms of the Montreal Protocol's emission reduction plans. New quasi-continuous ground-based atmospheric measurements allow us to estimate China's current emissions of the most effective ODS. This serves as an independent validation of China's ODS consumption data reported to the United Nations E…	Geophysical Research Letters
194	2009	Salunke B.K., Prakash K., Vishwakarma K.S., Maheshwari V.L.	Plant metabolites: An alternative and sustainable approach towards post harvest pest management in pulses	C. chinensis; Cyclotides; Grain legumes; Plant metabolite; Post harvest preservation	Grain legumes are an important source of proteins in vegetarian diet besides their role in biological nitrogen fixation. They are prone to heavy pest infestation both on and off the field. Pest associated losses are an important contributing factor towards declining per capita availability of grain legumes. Synthetic chemical pesticides have played an important role in crop preservation, however …	Physiology and Molecular Biology of Plants
195	2009	Steller A., Zimmermann A., Eisenberg S., Wolter K.-J., Lange P.	Reliability testing and damage analysis of lead-free solder joints: New assessment criteria for laboratory methods		Driven by legislation in the European Union (ELV directive 2000/53/EC [1]) and international industry activities for the use of environment-friendly technologies, automotive suppliers and OEMs are faced with the demand to substitute lead-containing solders in electronic assemblies. Compared to consumer electronics, for which lead-containing technologies had to be phased out by July 2006, automoti…	SAE International Journal of Materials and Manufacturing
196	2009	Brack W., Apitz S.E., Borchardt D., Brils J., Cristina C., Foekema E.M., Van Gils J., Jansen S., Harris B., Hein M., Heise S., Hellsten S., De Maagd P.G.-J., Müller D., Panov V.E., Posthuma L., Quevauviller P., Verdonschot P.F.M., Von Der Ohe P.C.	Toward a holistic and risk-based management of European river basins	Chemical status; Ecological status; Ecosystem; European Union Water Framework Directive; Holistic management	The European Union Water Framework Directive (WFD) requires a good chemical and ecological status of European surface waters by 2015. Integrated, risk-based management of river basins is presumed to be an appropriate approach to achieve that goal. The approach of focusing on distinct hazardous substances in surface waters together with investment in best available technology for treatment of indu…	Integrated Environmental Assessment and Management
197	2009	Månsson N., Bergbäck B., Sörme L.	Phasing out cadmium, lead, and mercury effects on urban stocks and flows	Chemicals policy; Heavy metals; Industrial ecology; Substance flow analysis (SFA); Toxic substances; Urban metabolism	Large stocks of metals have accumulated in the urban technosphere (i.e., the physical environment altered by human activity). To minimize health and environmental risks, attempts were begun in the 1980s to phase out the use of cadmium (Cd), lead (Pb), and mercury (Hg). To study the effect of this attempt, we conducted substance flow analyses (SFAs) in Stockholm, Sweden, in 1995 and in 2002-2003, …	Journal of Industrial Ecology
198	2009	Hart K., Gill V.A., Kannan K.	Temporal trends (1992-2007) of perfluorinated chemicals in Northern Sea Otters (Enhydra lutris kenyoni) from south-central alaska		Perfluorinated chemicals (PFCs) have been detected in abiotic and biotic matrices worldwide, including the Arctic Ocean. Considering these chemicals' persistent and bioaccumulative potentials, it was expected that levels of PFCs, like those of many legacy organic pollutants, would respond slowly to the restrictions in production and usage. Temporal trend studies in remote areas, such as the Arcti…	Archives of Environmental Contamination and Toxicology
199	2009	Sahu S.K., Ajmal P.Y., Pandit G.G., Puranik V.D.	Vertical distribution of polychlorinated biphenyl congeners in sediment core from Thane Creek area of Mumbai, India	Aroclor; Depth profile; PCB; Sediment; Source apportionment	In recent years there has been a growing concern all over the globe about the marine pollution due to persistent organic pollutants. Sediments, which is an important component of marine environment can serve as sorbent or concentrator for various persistent organic pollutants including Polychlorinated Biphenyls (PCBs). Transport and fate of PCB congeners in sediment depends on their physicochemic…	Journal of Hazardous Materials
200	2009	Bode S.	Nucs down in Germany-Prices up in Europe?	CO2 emissions; Energy policy in Germany; Nuclear energy	Current legislation on power production from nuclear energy in Germany defines certain remaining quantities of permitted electricity production for nuclear power plants. These quantities are defined for each nuclear power plant and are measured in TWh. In the discussion about climate protection and market trend of electricity prices, it is regularly stated by policy makers that the nuclear phase-…	Energy Policy
201	2009	Zhi G., Peng C., Chen Y., Liu D., Sheng G., Fu J.	Deployment of coal briquettes and improved stoves: Possibly an option for both environment and climate		The use of coal briquettes and improved stoves by Chinese households has been encouraged by the government as a means of reducing air pollution and health impacts. In this study we have shown that these two improvements also relate to climate change. Our experimental measurements indicate that, if all coal were burned as briquettes in improved stoves, particulate matter (PM), organic carbon (OC),…	Environmental Science and Technology
202	2009	M̊ansson N., Bergbäck B., Hjortenkrans D., Jamtrot A., Sörme L.	Utility of substance stock and flow studies: The Stockholm example	Decision support; Environmental management; Industrial ecology; Local government; Substance flow analysis (SFA); Urban environment	Despite phase-out policies, regulations, planning, and systematic thinking, diffuse emissions of hazardous substances from goods and materials accumulate in society. This is most pronounced in urban areas, since such emissions are related to high densities of people, services, and goods. In this study of Stockholm, Sweden, the aim is to discuss the utility of substance flow analyses (SFAs) for th…	Journal of Industrial Ecology
203	2009	Wan D., Xu J., Zhang J., Tong X., Hu J.	Historical and projected emissions of major halocarbons in China	China; Chlorofluorocarbons (CFCs); Emissions; Halocarbons; Halons; Hydrochlorofluorocarbons (HCFCs)	The halocarbons studied here are chemicals controlled in the 1987 Montreal Protocol on Substances that Deplete the Ozone Layer and its Amendments, which have both high ozone depleting potentials (ODPs) and high global warming potentials (GWPs). These halocarbons are mainly used for refrigeration, air-conditioning, foam blowing, tobacco expansion, aerosol propulsion, solvent cleaning, and fire fig…	Atmospheric Environment
204	2009	Lohmann L.	Climate as investment		The climate crisis and the credit crisis have made the political issues surrounding investment and finance more critical than ever before. Proposals for 'Green New Deals' and the like - aimed at tackling both global warming and global recession - are streaming forth worldwide. Yet many such proposals are incoherent in that they overlook the need for an immediate start to a programme of phasing ou…	Development and Change
205	2009	Kehbila A.G., Ertel J., Brent A.C.	Sustainability appraisal of used vehicle trade policy options in sub-Saharan African countries	Clean air initiative; Criteria analysis; Sub-Sahara Africa; Sustainability appraisal; Trade policy; Vehicle emissions	This paper examines the structure of contemporary vehicle mitigation commitments after lead gasoline phase out in sub-Sahara Africa. First, this paper reviews some of the leading domestic trade policy proposals (emission reduction actions) with regard to their expected technology impacts. Next, it assesses the options based on establishing benchmarks for measuring policy performance in curbing ve…	Environmentalist
206	2009	Specter H.	A sustainable US energy plan	Climate change; Coal; Conservation; Energy family; Energy storage; Environment; National security; Natural gas; Nuclear power; Oil; Political stalemate; Renewable energy; Second generation conservation	This report gives guidance on what could be done to overcome the political stalemate that has long blocked the creation of a sustainable energy plan, leaving the United States vulnerable to oil imports while emitting large amounts of greenhouse gases. An overall energy policy is suggested for use by political leaders, along with specific goals on climate change and national security. This report …	Natural Resources Research
207	2009	Gareau B.J., DuPuis E.M.	From public to private global environmental governance: Lessons from the Montreal Protocol's stalled methyl bromide phase-out		The Montreal Protocol on Substances that Deplete the Ozone Layer, a multilateral environmental agreement, has successfully eliminated the use of most ozone-depleting chlorofluorocarbons. As a result, a number of observers have pointed to the possibility of transferring successes - and even linking regulations - between the Montreal Protocol and Kyoto Protocol, the international but stalled climat…	Environment and Planning A
208	2009	Teresa De La Cruz M., Laborda F., Callén M.S., López J.M., Mastral A.M.	Study of Pb sources by Pb isotope ratios in the airborne PM10 of Zaragoza, Spain		Lead is a toxic trace element which produces harmful effects on human health, even at low concentrations, and it can be useful as ambient pollution tracer because the relative abundance of its four stable isotopes (204, 206, 207 and 208) depends on the emission source. This study was focused on the lead concentrations and isotope ratios in the PM10 of Zaragoza, in order to determine the main Pb p…	Journal of Environmental Monitoring
209	2009	Winkler H., Marquand A.	Changing development paths: From an energy-intensive to low-carbon economy in South Africa	Climate change mitigation; Development; Industrial policy; Low-carbon economy; South Africa; Sustainable development	Climate change mitigation poses significant challenges for South Africa and its energy development, historically highly energy intensive. At the same time, the country faces a host of daunting development challenges, exacerbated by the legacy of apartheid. Examining both challenges, this paper considers how alternative conceptions of a development path can be achieved. In the short term, energy e…	Climate and Development
210	2009	Arley J., McKeown A.	Red, white, and green: Transforming U.S. biofuels		Over the last decade, biofuels have been championed in the United States as a new source of income for rural communities, as a way to reduce dependence on foreign oil, and most recently as a solution to the country's energy and climate change problems. These latter concerns are now the main driver behind the promise of biofuels, leading the United States and other governments across the world to …	Worldwatch Paper
211	2009	Verbruggen A., Lauber V.	Basic concepts for designing renewable electricity support aiming at a full-scale transition by 2050	Feed-in tariffs; Qualification of renewable electricity; Tradable green certificates	Renewable electricity supply is a crucial factor in the realization of a low-carbon energy economy. The understanding is growing that a full turn-over of the electricity sectors by 2050 is an elementary condition for avoiding global average temperature increase beyond 2 °C. This article adopts such full transition as Europe's target when designing renewable energy policy. An immediate corollary i…	Energy Policy
212	2010	Yan S., Qian Y.	Environmental protection in 2008	Analysis and forecast; Ecological protection; Environmental protection; Prevention and control of pollution	In 2008, China's economic and social situation became ever more complicated and diversified, and this created challenges for environmental protection. After arduous eorts, the environmental disruption caused by the severe blizzards, hail and low temperatures in the south of the country, and the serious Wenchuan earthquake was successfully controlled, ensuring environmental safety in the disaster …	Chinese Academy of Social Sciences Yearbooks: Society
213	2010	Lybæk R., Andersen J.	Enhancing the sustainable development contribution of future CDM projects in Asia	CDM; CHP; Clean development mechanism; Combined heat and power; District heating; Industrial ecology; Planning tool; Sustainable development; Transfer of know-how; Value chain	This article explores how future CDM projects can be designed to become more attractive for some Asian countries. This might be achieved by enhancing the social and environmental benefits of such projects, e.g., by transforming the existing energy supply systems, by increasing job opportunities connected to the projects and/or by using indigenous biomass resources as fuel thereby phasing out the …	Progress in Industrial Ecology
214	2010	Shaw S.D., Blum A., Weber R., Kannan K., Rich D., Lucas D., Koshland C.P., Dobraca D., Hanson S., Birnbaum L.S.	Halogenated flame retardants: Do the fire safety benefits justify the risks?	Brominated flame retardants; Brominated Tris; Chlorinated flame retardants; Chlorinated paraffins; Chlorinated Tris; DecaBDE; Fire safety; Fire toxicity; Flame retardant regulations; Flammability standards; HBCD; OctaBDE; PBDD/F; PBDE; PentaBDE; Replacement flame retardants; TBBPA; TDCPP; Technical Bulletin 117	Since the 1970s, an increasing number of regulations have expanded the use of brominated and chlorinated flame retardants. Many of these chemicals are now recognized as global contaminants and are associated with adverse health effects in animals and humans, including endocrine and thyroid disruption, immunotoxicky, reproductive toxicity, cancer, and adverse effects on fetal and child development…	Reviews on Environmental Health
215	2010	Agrawal A.B., Shrivastava V.	Retrofitting of vapour compression refrigeration trainer by an eco-friendly refrigerant	Eco-friendly refrigerant; Hydrocarbon refrigerant; Montreal protocol; Ozone depletion; Retrofitting	After years of successful deliberations for tackling the grievous problem of ozone depletion, the United Nation's environmental protection agency concluded multinational agreement called "Montreal Protocol' for controlling the use of gases threatening the ozone layer. The successful implementation of the "Montreal Protocol' in developed countries is being appreciated for its significant reduction…	Indian Journal of Science and Technology
216	2010	Allam M., Garas G.	Recycled chopped rice straw-cement bricks: An analytical and economical study	agricultural wastes recycling; cement composites; cements brick; chopped rice straw	The Egyptian rice yield is one of the highest in the world (9.1 tons per hectare in 2001), a crop that leaves behind roughly 4.0 million tons of straw annually. Because of limited water resources, the government of Egypt has tried to limit rice cultivation. However, cultivation has continued to expand due to rice production's high profits. The methods for disposing of the straw and stubble residu…	WIT Transactions on Ecology and the Environment
217	2010	Clarke B.O., Porter N.A., Marriott P.J., Blackbeard J.R.	Investigating the levels and trends of organochlorine pesticides and polychlorinated biphenyl in sewage sludge	Biosolids; Carcinogen; Chlordane; DDT; Dieldrin; OCPs; PCBs; Sewage sludge	A study was completed to investigate temporal trends of organochlorine pesticides (OCPs; aldrin, chlordane, dieldrin, heptachlor, hexachlorbenzene, and DDT) and polychlorinated biphenyls (PCBs) in sewage sludge. Between 2004 and 2006 the concentration of OCPs and PCBs in Australian sewage sludge (n=829) was consistently &lt;1000μgkg-1 dry solids DS. Dieldrin, chlordane and DDE were detected in 68…	Environment International
218	2010	Pilgård A., De Vetter L., Van Acker J., Westin M.	Toxic hazard of leachates from furfurylated wood: Comparison between two different aquatic organisms	Daphnia magna; Furfurylated wood; Leaching; Toxicity Vibrio fischeri	Environmental concern regarding the use of toxic preservatives such as chromated copper arsenate CCA has been put forward. In the European Union, United States, and Japan, CCA has been phased out for residential and water-contact applications. Ecotoxicological studies of wood treated with conventional preservatives were carried out in the late 1990s, and it was concluded that the main impact is t…	Environmental Toxicology and Chemistry
219	2010	Sovacool B.K.	Building Umbrellas or Arks? Three Alternatives to Carbon Credits and Offsets		Carbon credit markets suffer seemingly inescapable flaws that may justify alternative approaches such as carbon taxes, a complete phase-out of carbon dioxide emissions, or a global carbon fund. In the years to come, we must remember that credits are not the only sensible policy options for responding to climate change. © 2010 Elsevier Inc. All rights reserved.	Electricity Journal
220	2010	Cheng H., Hu Y.	Lead (Pb) isotopic fingerprinting and its applications in lead pollution studies in China: A review	Isotopic fingerprinting; Lead poisoning; Lead pollution; Mass spectrometry; Source identification and apportionment; Stable isotopes	As the most widely scattered toxic metal in the world, the sources of lead (Pb) observed in contamination investigation are often difficult to identify. This review presents an overview of the principles, analysis, and applications of Pb isotopic fingerprinting in tracing the origins and transport pathways of Pb in the environment. It also summarizes the history and current status of lead polluti…	Environmental Pollution
221	2010	Kharecha P.A., Kutscher C.F., Hansen J.E., Mazria E.	Options for near-term phaseout of CO2 Emissions from coal use in the united states		The global climate problem becomes tractable if CO2 emissions from coal use are phased out rapidly and emissions from unconventional fossil fuels (e.g., oil shale and tar sands) are prohibited. This paper outlines technology options for phasing out coal emissions in the United States by ∼2030. We focus on coal for physical and practical reasons and on the U.S. because it is most responsible for a…	Environmental Science and Technology
222	2010	Paska D.	Facilitating substance phase-out through material information systems and improving environmental impacts in the recycling stage of a product	Brominated flame retardants; E-waste; Environment; Material declarations; Product content knowledge; Substance phase out; Substitution	The amount of electrical and electronic products is increasing rapidly, and this inevitably leads to the generation of large quantities of waste from these goods. Some of the generated e-waste ends up in regions with sub-standard recycling systems and may be processed under poor conditions. During uncontrolled incineration, halogenated dioxins and furans can be generated from brominated and chlor…	Natural Resources Forum
223	2010	Patel S.	Canada to shutter older coal plants		While the US awaits congressional action on a cap-and-trade program that could possibly be limited to just the utility sector, Canada is moving, starting in 2011, to phase out older coal power plants and replace them with natural gas-fired plants. The announcement, made by Environment Minister Jim Prentice prior to the G8 and G20 summits, could have serious implications for coal-fired generators …	Power
224	2010	Coulton R.	Phasing out unscrupulous wastewater disposal		Despite the UK construction industry's improved environmental efforts, the treatment and disposal of water associated with concreting activities is one area where best practice remains overlooked. High pH washwater can potentially have a devastating impact if discharged to the environment. A recent Environmental Audit on a large commercial building project revealed that washing truck mixer discha…	Water and Wastewater International
225	2010	Ramsey E.D., Sun Q., Zhang Z., Guo W., Liu J.Y., Wu X.H.	Sustainable oil-in-water analysis using a supercritical fluid carbon dioxide extraction system directly interfaced with infrared spectroscopy	Green technology; Infrared spectroscopy; Oil-in-water; Supercritical fluid extraction; Sustainable	A direct aqueous supercritical fluid extraction (SFE) system using carbon dioxide provides a sustainable means by which a vast range of industries may continue to depend on well established infrared (IR) techniques to determine oil-in-water. The SFE-IR method provides an environmentally friendly substitute for current national standard IR reference methods for measuring oil-in-water that rely on …	Journal of Environmental Sciences
226	2010	Zhu L., Tang J., Lee B., Zhang Y., Zhang F.	Lead concentrations and isotopes in aerosols from Xiamen, China	Aerosol; Coal combustion; Pb concentration; Pb isotopes; Xiamen	To investigate the magnitude and origin of lead (Pb) pollution in the atmosphere of Xiamen, China, 40 aerosol samples were collected from the coast of Xiamen from January to December 2003. All these samples were measured for Pb isotopic compositions (208Pb/206Pb=2.10897±0.00297, 207Pb/206Pb=0.85767±0.00159, n=40) using a Multi-collector-Inductively Coupled Plasma Mass Spectrometer (MC-ICPMS). Thi…	Marine Pollution Bulletin
227	2010	Eriksson E., Donner E., Ledin A.	Presence of selected priority and personal care substances in an onsite bathroom greywater treatment facility	Domestic sources; Grey wastewater; Personal care products; Priority substances; Substance loads	In recent years, concerns about climate change and the inefficient use and ongoing pollution of water resources have increased the political motivation to encourage water recycling. This has led to the widespread introduction of water saving measures and to advances in the decentralised treatment and reuse of wastewater. In particular, the treatment and reuse of greywater has received attention, …	Water Science and Technology
228	2010	Artuso F., Chamard P., Chiavarini S., di Sarra A., Meloni D., Piacentino S., Sferlazzo M.D.	Tropospheric halocompounds and nitrous oxide monitored at a remote site in the Mediterranean	Air mass transport; Greenhouse gases; Halocompounds; Nitrous oxide	Analysis of time series and trends of nitrous oxide (N2O) and halocompounds weekly monitored at the Mediterranean island of Lampedusa are discussed. Atmospheric N2O levels showed a linear upward growth rate of 0.78ppb yr-1 and mixing ratios comparable with Northern Hemisphere global stations. CFC-11 and CFC-12 time series displayed a decline consistent with their phase-out. Chlorofluorocarbons (C…	Atmospheric Environment
229	2010	[No author name available]	Stain protection in performance apparel: Providing clean solutions		Stain protection was once reserved for carpets and soft furnishings or hard wearing apparel such as raincoats and workwear. But it has now been embraced by the mainstream apparel industry-especially in men's wear, where the ease-of-care message has been greatly welcomed. Apparel retailers have discovered that stain protection enables them to differentiate their apparel lines, and to capitalise on…	Performance Apparel Markets
230	2010	Renöfält B.M., Jansson R., Nilsson C.	Effects of hydropower generation and opportunities for environmental flow management in Swedish riverine ecosystems	Dams; Environmental flow; Hydropower; Reservoirs; Sweden	Hydropower is often presented as a clean and renewable energy source that is environmentally preferable to fossil fuels or nuclear power. Hydropower production, however, fundamentally transforms rivers and their ecosystems by fragmenting channels and altering river flows. These changes reduce flow velocity and the number of rapids, and reduce or alter wetland, floodplain and delta ecosystems. Dam…	Freshwater Biology
231	2010	Eason C.T., Fagerstone K.A., Eisemann J.D., Humphrys S., O'Hare J.R., Lapidge S.J.	A review of existing and potential New World and Australasian vertebrate pesticides with a rationale for linking use patterns to registration requirements	America; Australia; Data requirements; Environmental safety; New Zealand; Regulation; Toxin	Registration is a necessarily sophisticated evaluation process applied to vertebrate pesticide products. Although conducted to minimise any potential impacts upon public health, the environment and food production, the all-encompassing process of registration can stifle innovation. Vertebrate pesticides are rarely used to control pest animals in food crops. In contrast to agrochemicals, relativel…	International Journal of Pest Management
232	2010	Zissis G., Aizenberg J.B., Shevchenko A.C.	Transforming the market for efficient lighting, Russia	Efficient lighting; Electricity consumption; Energy saving potential; Market transformation	Lighting accounts for 14% of all electricity demand in Russia and consumes approximately 137 billion kWh year. The largest energy saving potential in lighting systems exists within Russia's industrial buildings, residential sector and public buildings. The total lighting energy savings potential in Russia is enormous: 56 TWh/annum which is equivalent to approx. 39 Mt CO2 per annum, and this proje…	Light and Engineering
233	2010	Luo J., Chen S., Mai B., Fu J.	Advances in the study of current-use non-PBDE brominated flame retardants and dechlorane plus in the environment and humans	BTBPE; DBDPE; DP; HBCD; TBBPA	The fate of the high production volume, currently in use, and not regulated non-polybrominated diphenyl ether (PBDE) flame retardants, such as tetrabromobisphenol A (TBBPA), hexabromocyclododecane (HBCD) and dechlorane plus (DP), and the alternative flame retardants of PBDE, such as BTBPE and DBDPE, in the environment has attracted increasing attention and aroused concern due to the increasing re…	Science China Chemistry
234	2011	Eder T.	Focussing on energy strategies [Energiestrategien im fokus]		Geoinformation technologies are already well-established in the energy sector. Hence, the energy sector underlies a dynamic transition process that is essentially driven by climate protection targets, the dependency on fossil fuels, a continuously rising global energy demand and the phase-out of nuclear fission technologies in many countries. A report.	GIS-Business
235	2011	McKenzie R.L., Aucamp P.J., Bais A.F., Björn L.O., Ilyas M., Madronich S.	Ozone depletion and climate change: Impacts on UV radiation		The Montreal Protocol is working, but it will take several decades for ozone to return to 1980 levels. The atmospheric concentrations of ozone depleting substances are decreasing, and ozone column amounts are no longer decreasing. Mid-latitude ozone is expected to return to 1980 levels before mid-century, slightly earlier than predicted previously. However, the recovery rate will be slower at hig…	Photochemical and Photobiological Sciences
236	2011	Dishaw L.V., Powers C.M., Ryde I.T., Roberts S.C., Seidler F.J., Slotkin T.A., Stapleton H.M.	Is the PentaBDE replacement, tris (1,3-dichloro-2-propyl) phosphate (TDCPP), a developmental neurotoxicant? Studies in PC12 cells	Flame retardants; Neurotoxicity; Organophosphate; PC12 cells; TDCPP	Organophosphate flame retardants (OPFRs) are used as replacements for the commercial PentaBDE mixture that was phased out in 2004. OPFRs are ubiquitous in the environment and detected at high concentrations in residential dust, suggesting widespread human exposure. OPFRs are structurally similar to neurotoxic organophosphate pesticides, raising concerns about exposure and toxicity to humans. This…	Toxicology and Applied Pharmacology
237	2011	Yasuda T., Hayakashi T., Naoki S., Saito A., Maehara A., Okada A., Otani H., Hasegawa J.	Light sources and lighting circuits		According to machinery statistics of the Ministry of Economy, Trade and Industry, the quantity of electric lamps produced in Japan in 2010 was 797,000,000 (129.5% compared to the previous year). Of these, 70,000,000 were general lamps (95.5% compared to the previous year) and 35,000,000 were halogen lamps (109.7% compared to the previous year). The number of fluorescent lamps produced was 545,000…	Journal of Light and Visual Environment
238	2011	Goldberger J.R., Lehrer N., Brunner J.F.	Azinphos-methyl (AZM) phase-out: Actions and attitudes of apple growers in Washington State	apple production; azinphos-methyl; integrated pest management; pesticide use; sustainable agriculture; Washington State	The Environmental Protection Agency's phase-out of the pesticide azinphos-methyl (AZM) has encouraged the transition of apple pest management toward more environmentally and socially sustainable practices. This study reports on results of a 2009 survey of conventional apple growers in Washington State. Growers were asked about their approaches and attitudes toward the AZM phase-out and barriers t…	Renewable Agriculture and Food Systems
239	2011	Fagot M., de Cauwer B., Beeldens A., Boonen E., Bulcke R., Reheul D.	Weed flora in paved areas in relation to environment, pavement characteristics and weed control	Hard surfaces; Mechanical weed control; Non-chemical weed control; Pavements; Thermal weed control; Urban areas; Weed brushing	By 2015, all herbicide use on public pavements in Flanders (northern region of Belgium) will be phased out. Currently, little is known about weed flora in these pavements or their interactions with different weed control methods. The objectives of this study were to explore the species composition of pavements in relation to various abiotic factors and applied weed control methods. A vegetation s…	Weed Research
240	2011	Anyanova E.	Offshore wind energy and the rules of international law: Phasing out nuclear power	Global warming; Offshore wind energy; UNCLOS; United nations convention on the law of the sea; Wind farms	Climate change and global warming are serious problems that necessitate such solutions as for example alternative methods of energy production including wind energy. Offshore wind parks construction, which is considered to be more beneficial than construction of those on land, is a relatively young sphere in the alternative methods of energy production. Although the main basics for its regulation…	International Journal of Public Law and Policy
241	2011	Johnsson F.	Perspectives on CO2 capture and storage	Carbon capture; CCS; Development; Emissions; Greenhouse gas	The last decade has seen a signifi cant increase in the research and development of CO2 capture and storage (CCS) technology. CCS is now considered to be one of the key options for climate change mitigation. This perspective provides a brief summary of the state of the art regarding CCS development and discusses the implications for the further development of CCS, particularly with respect to cli…	Greenhouse Gases: Science and Technology
242	2011	Weber R., Watson A., Forter M., Oliaei F.	Persistent organic pollutants and landfills - A review of past experiences and future challenges	brominated flame retardants; HCH; landfill; PBDE; PCB; PCDD/PCDF; Persistent organic pollutants; PFOS; POPs; Stockholm Convention	The landfilling and dumping of persistent organic pollutants (POPs) and other persistent hazardous compounds, such as polychlorinated biphenyls (PCBs), hexachlorocyclohaxane (HCH), polybrominated diphenylether (PBDEs) or perfluorooctane sulfonic acid (PFOS) can have significant adverse environmental consequences. This paper reviews past experiences with such disposal practices and highlights thei…	Waste Management and Research
243	2011	Allione C., Tamborrini P., Elia M.	Eco-efficiency into the lighting design: From an environmental quantitative analysis of the available light bulbs to qualitative guidelines for designing innovative and sustainable lighting system	Guidelines for a sustainable lighting system; Lighting design; Simplified LCA of light bulbs	The paper deals with a research focused on illustrating advantages and disadvantages on the environment and human health (GT applies to replacement, dont code) which come from the adoption of the Commission Regulation (EC) N. 244/2009 on the ecodesign of non-directional household lamps. Specifically this directives is aimed at setting innovative ecodesign requirements in order to phase out less-e…	Design Principles and Practices
244	2011	Sovacool B.K.	The policy challenges of tradable credits: A critical review of eight markets	Cap-and-trade; Carbon credits; Climate change	This article offers a critical review of eight tradable permit markets: water permits at Fox River, Wisconsin; the U.S. leaded gasoline phase-out; sulfur dioxide credits under the U.S. Clean Air Act Amendments of 1990; the Regional Clean Air Incentives Market (RECLAIM) for controlling ozone and acid rain in Southern California; renewable energy credit trading at the regional level in the United S…	Energy Policy
245	2011	Wu W.-T., Tsai P.-J., Yang Y.-H., Yang C.-Y., Cheng K.-F., Wu T.-N.	Health impacts associated with the implementation of a national petrol-lead phase-out program (PLPOP): Evidence from Taiwan between 1981 and 2007	Blood lead level; Environmental lead emission; Mortality rate; Petrol-lead phase-out program	Background and objective: In 1981, a petrol-lead phase-out program (PLPOP) was launched in Taiwan for the abatement of environmental lead emissions. The present study was set out to examine whether the reduction of environmental lead emissions would result in the decrease in mortality rates of various diseases based on national data between 1981 and 2007. Method: The national mortality data were …	Science of the Total Environment
246	2011	Post R.M., Tribble R.H., Richardson J.R.	Development of next generation phosphorus-free cooling water treatment technology	Cooling; Cooling towards; Environment; EPA; Phosphates; Regulations	Eutrophication of surface waters is a problem of global significance. The US Environmental Protection Agency (EPA) reported that excess nutrients associated with human activities were the cause of water quality degradation in around half of the impaired waterbodies. Phosphorus and nitrogen, the primary excess nutrients are attributed to causing algae blooms, low dissolved oxygen, fish kills, incr…	Ultrapure Water
247	2011	Keles D., Möst D., Fichtner W.	The development of the German energy market until 2030-A critical survey of selected scenarios	CO2-emissions; Energy demand; Energy scenarios	Many scenarios have been generated in the last years analysing the international energy market. The variety of these scenarios is manifold, as they are generated by different institutions using different methodological approaches and different framework assumptions. However, these scenarios can roughly be classified into three main groups: "moderate", "climate protection" and "resource scarcity a…	Energy Policy
248	2011	Dafforn K.A., Lewis J.A., Johnston E.L.	Antifouling strategies: History and regulation, ecological impacts and mitigation	Anti-fouling; Biocides; Copper; Ecological impacts; Regulations; Tributyltin	Biofouling increases drag on marine vessels resulting in higher fuel consumption and can also facilitate the transport of harmful non-indigenous species (NIS). Antifouling technologies incorporating biocides (e.g., copper and tributyltin) have been developed to prevent settlement of organisms on vessels, but their widespread use has introduced high levels of contamination into the environment and…	Marine Pollution Bulletin
249	2011	Abdullah M.O., Tan I.A.W., Lim L.S.	Automobile adsorption air-conditioning system using oil palm biomass-based activated carbon: A review	Adsorption; Air-conditioning; Automobile; Coefficient of performance (COP); Exhaust gas	Refrigeration and air-conditioning technology are required to evolve in accordance to Montreal Protocol adopted in 1987 and Kyoto Protocol in 1997. This regulation concerns about the climate change in an attempt to phase-out chlorofluorocarbons (CFCs), followed by hydro-chlorofluorocarbons (HCFCs) and then moving to 1,1,1,2-tetrafluoroethane (HFC-134a) starting 2011. This trend leads to a strong …	Renewable and Sustainable Energy Reviews
250	2011	Jaccard M., Tu J.	Show some enthusiasm, but not too much: Carbon capture and storage development prospects in China	CCS; China; Climate; Coal	China is the world's largest carbon dioxide (CO2) emitter and its energy system is dominated by coal. For China to dramatically reduce its greenhouse gas (GHG) emissions over the next few decades, it must either replace most of its uses of coal with energy supplies from renewables and nuclear power or install demonstration-size and then scaled-up carbon capture and storage (CCS) technologies. Cur…	Global Environmental Change
251	2011	Schulte-Oehlmann U., Oehlmann J., Keil F.	Before the curtain falls: Endocrine-active pesticides - A German contamination legacy		As a result of the European Parliament approving a new EU pesticide regulation (1107/2009/EC replacing directive 91/414/EEC) and a directive on the sustainable use of pesticides (2009/128/EC), in October 2009, various active ingredients are likely to be banned for use as pesticides. The use of pesticides that are carcinogenic, mutagenic, and toxic to reproduction, or that have endocrine-disruptin…	Reviews of Environmental Contamination and Toxicology
252	2011	Dixon R.K.	Global Environment Facility investments in the phase-out of ozone-depleting substances	Countries with economies in transition; Global environment facility; Montreal Protocol; Stratospheric ozone	Stratospheric ozone depletion threatens human health and the global environment. In 1987, the Montreal Protocol on Substances That Deplete the Ozone Layer (Montreal Protocol) set aggressive timelines for countries to phase-out products and organic chemicals that were causing rapid ozone depletion in the Antarctic stratosphere. The Global Environment Facility (GEF), established in 1991, is the lar…	Mitigation and Adaptation Strategies for Global Change
253	2011	Zhang D., Aunan K., Martin Seip H., Vennemo H.	The energy intensity target in China's 11th Five-Year Plan period-Local implementation and achievements in Shanxi Province	China; Energy intensity; Energy policy	Facing the mounting pressure on energy security and increasing environmental concerns about air pollution and climate change, the Chinese government set a mandatory goal of 20% reduction of energy intensity in its 11th Five-Year Plan period (FYP, 2006-2010). In this paper we use Shanxi province to illustrate how policies and measures are implemented in practice at a provincial level as a response…	Energy Policy
254	2011	Papasavva S., Andersen S.O.	Life-cycle climate performance metric for mobile air conditioning technology choice	greenhouse gases; HFC; industrial ecology; life cycle analysis; mobile air conditioning; refrigerant	Most refrigerants used today are potent chlorofluorocarbon (CFC), hydrochlorofluorocarbon (HCFC), and hydrofluorocarbon (HFC), greenhouse gases (GHG) that can contribute significantly to anthropogenic climate change and stratospheric ozone depletion. In a business-as-usual scenario, HFC emissions in 2050 have been predicted to be equivalent to 9-19% (CO2-eq. basis) of projected global CO2 emissio…	Environmental Progress and Sustainable Energy
255	2011	Gao S., Pflaum T., Qin R.	Trapping efficiency of 1,3-dichloropropene isomers by XAD-4 sorbent tubes for air sampling	Emissions; Soil fumigants; Volatile organic compounds	Emission monitoring is necessary to evaluate the impact of air pollutants such as soil fumigants on the environment. Quantifying fumigant emissions often involves the use of air sampling tubes filled with sorbents to trap fumigants. 1,3-dichloropropene (1,3-D) and chloropicrin (CP) are being increasingly used in combination in soil fumigation since the phase-out of methyl bromide. Charcoal and XA…	Atmospheric Environment
256	2011	Lithner D., Larsson A., Dave G.	Environmental and health hazard ranking and assessment of plastic polymers based on chemical composition	Environment; Hazardous substances; Health; Plastic polymers; Plastics; Toxicity	Plastics constitute a large material group with a global annual production that has doubled in 15. years (245. million tonnes in 2008). Plastics are present everywhere in society and the environment, especially the marine environment, where large amounts of plastic waste accumulate. The knowledge of human and environmental hazards and risks from chemicals associated with the diversity of plastic …	Science of the Total Environment
257	2011	Armaroli N., Balzani V.	Towards an electricity-powered world		The purpose of this review is examination of the present scenario of electricity production and investigation of whether an electricity powered world is possible, indicating which primary energy forms should be preferably utilized. Currently, most of the primary energy used by mankind, including that employed to generate electricity, comes from fossil fuels, which need to be phased out because th…	Energy and Environmental Science
258	2011	Benskin J.P., Phillips V., St. Louis V.L., Martin J.W.	Source elucidation of perfluorinated carboxylic acids in remote alpine lake sediment cores		Atmospheric deposition of perfluorinated carboxylic acids (PFCAs) in remote regions might arise from transport and degradation of precursors (e.g., perfluorooctanesulfonyl fluoride (PFOSF)-based products or fluorotelomer alcohols (FTOHs)) or direct transport (e.g., PFCAs in the vapor phase or on particles). To probe the dominant atmospheric source of PFCAs, historical trends in environmental FTOH…	Environmental Science and Technology
259	2011	Awad E., Zhang X., Bhavsar S.P., Petro S., Crozier P.W., Reiner E.J., Fletcher R., Tittlemier S.A., Braekevelt E.	Long-term environmental fate of perfluorinated compounds after accidental release at Toronto airport		Perfluorooctane sulfonate (PFOS; a perfluorinated compound or PFC), its salts, and perfluorooctane sulfonyl fluoride have recently been listed in Annex B of the Stockholm Convention due to their widespread presence, persistence, and toxicity. Because of the persistent nature of PFCs, it is generally presumed that the impact of direct discharges of these chemicals on a receiving environment would …	Environmental Science and Technology
260	2011	Verbruggen A.	Preparing the design of robust climate policy architectures	Climate policy design principles; Diversity; Equity	The design of climate policy architectures depends on how its multiple designers identify the climate problem, on the principles they adhere to, and on the criteria they apply for assessing the performance of the constructed agreements. This article presents five core features of the climate policy problem, five principles demanding respect when designing policy, and a particular specification of…	International Environmental Agreements: Politics, Law and Economics
261	2011	Geiser K.	Redesigning chemicals policy: A very different approach	Chemicals policy; Green chemistry; Hazardous chemicals; Systems thinking	The chemical policies of the 1970s were limited by the assumptions that lie at their foundation and focused narrowly on only the most hazardous chemicals. The effective management of chemicals requires policies that focus on the entire body of chemicals and the production systems that make them. The future will require comprehensive chemicals policies that work within a systems framework to phase…	New Solutions
262	2011	Belliveau M.E.	The drive for a safer chemicals policy in the United States	Policy; Safer alternatives; Toxic chemicals; TSCA	This article analyzes the history, policies and politics of the modern era of safer chemical policy reform in the United States. In the last decade, state laws have modeled a chemical policy framework to phase out unnecessary dangerous chemicals in favor of safer alternatives. These state drivers, along with market campaigns to reduce downstream business use of hazardous chemicals, have weakened …	New Solutions
263	2011	Valentine S.V.	Japanese wind energy development policy: Grand plan or group think?	Energy policy; Japan; Wind power	This paper analyzes Japan's national power generation strategy with a view to explaining Japan's phlegmatic approach to wind energy development. The analysis concludes that Japan's current power generation strategy is not optimized to achieve the government's three strategic energy objectives of simultaneously enhancing economic security, national energy security and environmental security (3Es).…	Energy Policy
264	2011	Friedlingstein P., Solomon S., Plattner G.-K., Knutti R., Ciais P., Raupach M.R.	Long-term climate implications of twenty-first century options for carbon dioxide emission mitigation		Long-term future warming is primarily constrained by cumulative emissions of carbon dioxide. Previous studies have estimated that humankind has already emitted about 50% of the total amount allowed if warming, relative to pre-industrial, is to stay below 2C (refs,). Carbon dioxide emissions will thus need to decrease substantially in the future if this target is to be met. Here we show how links …	Nature Climate Change
265	2011	Foran B.	Low carbon transition options for Australia	Climate mitigation; Energy transitions; Policy options; Rebound; Renewables	A rapid and sustained transition to new energy systems for Australia was explored using the OzECCO model implemented in a systems dynamics simulation package. OzECCO simulates the close relationship between energy use and economic productivity at a sectoral level to explore scenarios of economic and biophysical function based on a calibration period of 1981-2005 and a scenario period 2006-2051. T…	Ecological Modelling
266	2012	Zushi Y., Hogarh J.N., Masunaga S.	Progress and perspective of perfluorinated compound risk assessment and management in various countries and institutes	Guideline; Management; Perfluorinated compounds (PFCs); Regulation; Risk assessment; TDI	Perfluorooctane sulfonate (PFOS) and related compounds have recently been designated as target chemicals for regulation by the Stockholm Convention on Persistent Organic Pollutants (POPs). Many countries have investigated and tried to implement various countermea-sures in response to this decision. In this article, we collect reports concerning regulations and risk evaluations of perfluorinated c…	Clean Technologies and Environmental Policy
267	2012	Friege H.	The role of waste management in the control of hazardous substances: Lessons learned	CFCs; Chemical policy; Contamination of secondary resources; Dissipative use; Globalization; H-CFCs; PCBs; Substance chain management; Waste management	Background: Sorting and disposal of waste are the last steps in the "lifetime" of a product. If products are contaminated with chemicals assessed to be hazardous for man or environment, waste management has the role of a vacuum cleaner in substance chain management working in two different ways: The hazardous compounds have to be properly separated from potential secondary resources in sorting pr…	Environmental Sciences Europe
268	2012	Fürsch M., Lindenberger D., Malischek R., Panke T., Nagl S., Trüby J.	German nuclear policy reconsidered: Implications for the electricity market	Climate protection; Electricity market modeling; Nuclear policy; Renewable energy	In the aftermath of the nuclear catastrophe in Fukushima-Daiichi, German nuclear policy has been reconsidered. This paper demonstrates the economic effects of an accelerated nuclear phase-out in Germany on the European electricity market. An optimization model is used to analyze two scenarios with different lifetimes for nuclear plants in Germany (phase-out vs. prolongation). Based on political t…	Economics of Energy and Environmental Policy
269	2012	Wöhrnschimmel H., MacLeod M., Hungerbuhler K.	Global multimedia source-receptor relationships for persistent organic pollutants during use and after phase-out	HCH; Long-range transboundary air pollution; PCB; Primary emission; Secondary emission	Chemicals that are persistent in the atmosphere can be transported long distances and across international boundaries. Therefore, information about the fraction of local versus imported air pollution is required to formulate regulations aimed at controlling pollutant levels. The objective of this work is to illustrate the capabilities of a dynamic global-scale multimedia model to calculate source…	Atmospheric Pollution Research
270	2012	Kayhanian M.	Trend and concentrations of legacy lead (Pb) in highway runoff	Contaminated soil; Highway runoff; Isotope; Lead concentration; Leaded gasoline	This study presents the results of lead (Pb) concentrations from both highway runoff and contaminated soil along 32 and 23 highway sites, respectively. In general, the Pb concentration on topsoil (0-15 cm) along highways was much higher than the Pb concentration in subsurface soil (15-60 cm). The Pb deposited on soil appears to be anthropogenic and a strong correlation was found between the Pb co…	Environmental Pollution
271	2012	Wilson T.O., McNeal F.M., Spatari S., G. Abler D., Adler P.R.	Densified biomass can cost-effectively mitigate greenhouse gas emissions and address energy security in thermal applications		Regional supplies of biomass are currently being evaluated as feedstocks in energy applications to meet renewable portfolio (RPS) and low carbon fuel standards. We investigate the life cycle greenhouse gas (GHG) emissions and associated abatement costs resulting from using densified switchgrass for thermal and electrical energy. In contrast to the large and positive abatement costs for using biom…	Environmental Science and Technology
272	2012	Omidbakhsh N.	Should the AOAC use-Dilution method be continued for regulatory purposesγ		Despite its very poor reproducibility, AOAC INTERNATIONAL's use-dilution method (UDM) for bactericidal activity (AOAC Methods 964.02, 955.14, and 955.15) has been required by the U.S. Environmental Protection Agency (EPA) since 1953 for regulatory purposes, while methods with better reproducibility have been adopted in Canada and Australia. This study reviews UDM from a statistical perspective. A…	Journal of AOAC International
273	2012	Cousillas A., Pereira L., Heller T., Alvarez C., Mañay N.	Impacts of multidisciplinary actions on environmental lead exposure in Uruguay	Environment; Lead exposure; Multidisciplinary actions; Uruguay	Environmental lead contamination in Uruguay became a matter of public concern in 2001, when cases of children with blood lead levels (BLL) higher than 20 μg/dl appeared in some low-income neighborhoods of Montevideo, being 10 μg/dl the intervention reference BLL. The aim of this paper is to show the results of multidisciplinary actions taken by decisions makers in social, environmental and health…	Environmental Geochemistry and Health
274	2012	Jambari A., Azhar B., Ibrahim N.L., Jamian S., Hussint A., Puan C.L., Noor H.M., Yusof E., Zakaria M.	Avian biodiversity and conservation in malaysian oil palm production areas	Avian biodiversity; Bird species richness; Conservation measures; Oil palm; Production areas	Our study demonstrated the persistence of avian biodiversity in established oil palm production areas. Here, the empirical evidence on avian species richness reflects explicitly that oil palm production areas are not merely a green biological desert'. We investigated the relationships between bird species richness and dfferent management regimes (plantations vs. smaliholdings) and vegetation char…	Journal of Oil Palm Research
275	2012	Aucott M., Caldarelli A.	Quantity of lead released to the environment in New Jersey in the form of motor vehicle wheel weights	Heavy metal; Lead; Motor vehicles; Wheel weights	Lead is a well-known pollutant with documented toxicity. Lead-containing weights used to balance motor vehicle wheels are regularly lost from vehicles and enter the environment. Lead weights deposited on roadways in the vicinity of Trenton, NJ were gathered and measured from February 2006 to January 2009. Measurements included loss of mass from specific weights exposed to traffic. Extrapolation o…	Water, Air, and Soil Pollution
276	2012	Patel S.	Switzerland contemplates filling future nuclear energy gap		Switzerland's Department of the Environment, Transport, Energy, and Communications (DETEC) developed a model to be used in formulating the country's new energy policy through 2050. The country's decision not to build any new nuclear power plants suggests that the phase-out could cost nearly $33 billion. DETEC found that the phase-out would not impact overall final energy consumption and electrici…	Power
277	2012	Robèrt K.-H.	The policy-science nexus: An area for improved competence in leadership		It is a fantastic experience to understand basic principles for worthy goals together-across disciplinary, professional, and ideological boundaries-and to realize that we need each other in order to attain those goals. Conversely, it is sobering that so few of our leaders know how to build full sustainability into their decision making, and to shape their analyses, debates, action programs, stake…	Sustainability
278	2012	Börjesson M., Ahlgren E.O.	Modelling transport fuel pathways: Achieving cost-effective oil use reduction in passenger cars in Sweden	Biofuels; Energy system; MARKAL; Oil dependency; Optimisation; Transportation sector	Several technology and fuel options could be used to lower the strong oil dependence of the transportation sector. To formulate policies and to cost-effectively meet oil reduction objectives, assessments and comparisons of the long-term economic performances of different technology trajectories are essential. In this work, the energy and technology costs associated with reducing oil consumption i…	Technological Forecasting and Social Change
279	2012	Gewurtz S.B., De Silva A.O., Backus S.M., McGoldrick D.J., Keir M.J., Small J., Melymuk L., Muir D.C.G.	Perfluoroalkyl contaminants in Lake Ontario Lake Trout: Detailed examination of current status and long-term trends		Perfluoroalkyl contaminants (PFCs) were determined in Lake Ontario Lake Trout sampled annually between 1997 and 2008 in order to assess how current trends are responding to recent regulatory bans and voluntary phase-outs. We also combined our measurements with those of a previous study to provide an updated assessment of long-term trends. Concentrations of PFCs generally increased from the late 1…	Environmental Science and Technology
280	2012	Schmidt T.S., Born R., Schneider M.	Assessing the costs of photovoltaic and wind power in six developing countries		To support developing countries in greenhouse-gas emission abatement the 2010 Canc°n Agreement established various institutions, among others a financial mechanism administered by the Green Climate Fund. However, the instruments for delivering the support and the magnitude of different countries' financial needs are strongly debated. Both debates are predominantly underpinned by rather aggregate …	Nature Climate Change
281	2012	van Wendel de Joode B., Barraza D., Ruepert C., Mora A.M., Córdoba L., Öberg M., Wesseling C., Mergler D., Lindh C.H.	Indigenous children living nearby plantations with chlorpyrifos-treated bags have elevated 3,5,6-trichloro-2-pyridinol (TCPy) urinary concentrations	Banana; Biomarkers; Children; Chlorpyrifos; Developing countries; Pesticides	Background: The US Environmental Protection Agency voluntary phased-out residential use of chlorpyrifos in 2001. In contrast, in Costa Rica, chlorpyrifos-treated bags are increasingly used to protect banana and plantain fruits from insects and to fulfill product standards, even in populated areas. Objectives: To evaluate children's exposure to chlorpyrifos in villages situated nearby banana plant…	Environmental Research
282	2012	Chenery S.R., Izquierdo M., Marzouk E., Klinck B., Palumbo-Roe B., Tye A.M.	Soil-plant interactions and the uptake of Pb at abandoned mining sites in the Rookhope catchment of the N. Pennines, UK - A Pb isotope study	Isotopic dilution; Lead; Mining; Pb isotopes; Plants; UK	This paper examines Pb concentrations and sources in soil, grass and heather from the Rookhope catchment in the North Pennines, UK, an area of historical Pb and Zn mining and smelting. Currently, the area has extensive livestock and sports shooting industries. Risk assessment, using the source-pathway-receptor paradigm, requires the quantification of source terms and an understanding of the many …	Science of the Total Environment
283	2012	Van Wilgen B.W., Richardson D.M.	Three centuries of managing introduced conifers in South Africa: Benefits, impacts, changing perceptions and conflict resolution	Biodiversity; Biological invasions; Fire; Forestry; Hydrology; Land-use; Pinus	Alien conifers, mainly pines, have been planted in South Africa for a range of purposes for over 300 years. Formal plantations cover 660 000 ha of the country, and invasive stands of varying density occur on a further 2.9 million ha. These trees have brought many benefits but have also caused unintended problems. The management of alien conifers has evolved in response to emerging problems such a…	Journal of Environmental Management
284	2012	Liu C.H., Lin S.J., Lewis C.	Environmental impacts of electricity sector in Taiwan by using input-output life cycle assessment: The role of carbon dioxide emissions	CO2 emissions; Direct and indirect impacts; Electricity sector; IO-LCA	Electricity has played a critical role in supporting industrial development and economic growth in Taiwan. In this study, input-output analysis is combined with life cycle assessment to evaluate the total environmental impacts (including direct and indirect) of the electricity sector in Taiwan. The results indicate that the environmental impacts of Taiwan's electricity sector increased from 2001 …	Aerosol and Air Quality Research
285	2012	Dugo M.A., Han F., Tchounwou P.B.	Persistent polar depletion of stratospheric ozone and emergent mechanisms of ultraviolet radiation-mediated health dysregulation	Aryl hydrocarbon receptor (AhR) and nuclear factor (erythroid-derived 2)-related factor 2 (Nrf2) transcription factors; Biologic rhythmicity; Carcinogenicity; Climate change; Seasonal-circadian rhythms; Skin disorders	Year 2011 noted the first definable ozone "hole" in the Arctic region, serving as an indicator to the continued threat of dangerous ultraviolet radiation (UVR) exposure caused by the deterioration of stratospheric ozone in the northern hemisphere. Despite mandates of the Montreal Protocol to phase out the production of ozone-depleting chemicals (ODCs), the relative stability of ODCs validates pop…	Reviews on Environmental Health
286	2012	Mez L.	Germany's merger of energy and climate change policy	Climate change; Energiewende; Energy efficiency; Fukushima; Greenhouse gas emissions; Nuclear energy; Renewable energy	Nuclear exit has been on the German policy agenda for more than three decades. After the Chernobyl accident in 1986, a majority of the public and relevant stakeholders opposed nuclear power and strove for renewable energy alternatives. At the same time, climate change policy gained the attention of German policy makers, and they approved ambitious targets for the reduction of greenhouse gas emiss…	Bulletin of the Atomic Scientists
287	2012	Kim J.A., Chung S.-Y.	The role of the G20 in governing the climate change regime	Climate change; Environmental governance; G20; Global governance; Governance	A wide array of institutions governing climate change has proliferated over the past years, influencing the rule-makings of the regime. One of them is the G20. When G20 leaders around the world convened in London to restore global economies, they stressed the importance of a 'resilient, sustainable, and green recovery' and reaffirmed their commitments to address climate change. This was followed …	International Environmental Agreements: Politics, Law and Economics
288	2012	Schreurs M.A.	The politics of phase-out	Angela merkel; Energiewende; Fukushima; Germany; Nuclear phase out; Nuclear power; Politics; Renewable energy	The German decision to phase out nuclear energy following the Fukushima crisis builds on earlier political decisions to support the growth of renewable electricity, to improve energy efficiency, and to turn Germany toward sustainable energy and away from nuclear power. Germany is now embarking on what is known as the Energiewende, a plan to turn the entire economy to a low-carbon energy structure…	Bulletin of the Atomic Scientists
289	2012	Kannan R., Turton H.	Cost of ad-hoc nuclear policy uncertainties in the evolution of the Swiss electricity system	Nuclear uncertainties; Switzerland electricity supply; TIMES model	About one-third of the Swiss nuclear capacity is due to be retired in the next ten years, creating a short-term supply gap. In addition, the Swiss Federal Council has decided to phase out nuclear power over the longer term by not replacing existing nuclear power plants after retirement. We have analysed possible electricity supply options for responding to these two developments under different c…	Energy Policy
290	2012	Stošić Z.V.	Nuclear fundamentals remain	Energy policy; Nuclear energy	For Japan, the situation has become extremely difficult since counter-measures to deal with the nuclear accident had to be carried out along with dealing with the broader disaster caused by earthquake and the tsunami. In terms of damage, the Tohoku earthquake and the tsunami have caused the most fatalities and the largest economic loss ever from an earthquake and/or tsunami. The impact of this na…	Thermal Science
291	2012	Johnsson F., Kjarstad J., Odenberger M.	The importace of co 2 capture and storage - A geopolitical discussion	Carbon capture; CCS; CO 2; Geopolitics; Greenhouse gas	The CO 2 capture and storage (CCS) technology is since more than ten years considered one of the key options for the future climate change mitigation. This paper discusses the implications for the further development of CCS, particularly with respect to climate change policy in an international geopolitics context. The rationale for developing CCS should be the over-abundance of fossil fuel reser…	Thermal Science
292	2012	Bednar-Friedl B., Schinko T., Steininger K.W.	The relevance of process emissions for carbon leakage: A comparison of unilateral climate policy options with and without border carbon adjustment	Border tariffs; Carbon leakage; Embodied carbon; Low-carbon technologies; Process emissions	Climate policy arrangements of partial regional coverage, as they seem to emerge from the UNFCCC process, might lead to carbon leakage and hence a broad literature has developed to quantify leakage. Most of these analyses, however, are confined to consider emissions from fuel combustion only. Yet, some of the most relevant simultaneously energy intensive and internationally trade exposed sectors …	Energy Economics
293	2012	Welaya Y.M.A., Abdel Naby M.M., Tadros M.Y.	Technological and economic study of ship recycling in Egypt	Fuzzy logic approach; Marine environment protection; Ship breaking yard; Ship recycling; Ship scrapping	The ship recycling industry is growing rapidly. It is estimated that the International Maritime Organization's (IMO) decision to phase-out single hull tankers by 2015 will result in hundreds of ships requiring disposal. At present, the ship recycling industry is predominantly based in South Asia. Due to the bad practice of current scrapping procedure, the paper will highlight the harm occurring t…	International Journal of Naval Architecture and Ocean Engineering
294	2012	Samtani J.B., Gilbert C., Ben Weber J., Subbarao K.V., Goodhue R.E., Fennimore S.A.	Effect of steam and solarization treatments on pest control, strawberry yield, and economic returns relative to methyl bromide fumigation	Additional index words. fragaria xananassa; Fumigant emission reduction; Organic; Verticillium dahliae; Weed control	The phase-out of methyl bromide as a soil fumigant for strawberry (Fragaria xananassa, Duch.) and increasingly strict regulations of all fumigants suggest that non-fumigant methods of soil disinfestation are needed. In warm climates, solarization controls soilborne pests, but fog and lower summer soil temperatures in coastal California render it unsuitable for pest control relative to chemical fu…	HortScience
295	2012	Berman T., Amitai Y., Almog S., Richter E.D.	Human biomonitoring in Israel: Past, present, future	Environment; Exposure; Human biomonitoring; Israel; Occupational; Population	The first human biomonitoring (HBM) studies in Israel in the 1970s and 80s focused on measuring exposure to polychlorinated biphenyls (PCBs) and organochlorine insecticides in the general population and organophosphate pesticides in agricultural workers. In the late 1990s, a regional human biomonitoring study found differences in blood lead levels in children from Israel, Jordan, and the Palestin…	International Journal of Hygiene and Environmental Health
296	2012	Kohlhepp R., Ruhnke R., Chipperfield M.P., De Mazière M., Notholt J., Barthlott S., Batchelor R.L., Blatherwick R.D., Blumenstock Th., Coffey M.T., Demoulin P., Fast H., Feng W., Goldman A., Griffith D.W.T., Hamann K., Hannigan J.W., Hase F., Jones N.B., Kagawa A., Kaiser I., Kasai Y., Kirner O., Kouker W., Lindenmaier R., Mahieu E., Mittermeier R.L., Monge-Sanz B., Morino I., Murata I., Nakajima…	Observed and simulated time evolution of HCl, ClONO 2, and HF total column abundances		Time series of total column abundances of hydrogen chloride (HCl), chlorine nitrate (ClONO 2), and hydrogen fluoride (HF) were determined from ground-based Fourier transform infrared (FTIR) spectra recorded at 17 sites belonging to the Network for the Detection of Atmospheric Composition Change (NDACC) and located between 80.05° N and 77.82° S. By providing such a near-global overview on ground-b…	Atmospheric Chemistry and Physics
297	2012	Ntalli N.G., Caboni P.	Botanical nematicides: A review	bionematicides; biopesticides; nematicidal compounds	Despite the uselfuness of nematicidal compounds in agricultural practices, some serious concerns are raised today about their excessive use leading to enhancement of biodegradation mechanisms in soil expressed as lack of efficacy under field conditions and resistance development. Moreover, the phase-out of methyl bromide has led to the need for a valid alternative to organophosporous and carbamat…	Journal of Agricultural and Food Chemistry
298	2012	Saikawa E., Rigby M., Prinn R.G., Montzka S.A., Miller B.R., Kuijpers L.J.M., Fraser P.J.B., Vollmer M.K., Saito T., Yokouchi Y., Harth C.M., Mühle J., Weiss R.F., Salameh P.K., Kim J., Li S., Park S., Kim K.-R., Young D., O'Doherty S., Simmonds P.G., McCulloch A., Krummel P.B., Steele L.P., Lunder C., Hermansen O., Maione M., Arduini J., Yao B., Zhou L.X., Wang H.J., Elkins J.W., Hall B.	Global and regional emission estimates for HCFC-22		HCFC-22 (CHClF2, chlorodifluoromethane) is an ozone-depleting substance (ODS) as well as a significant greenhouse gas (GHG). HCFC-22 has been used widely as a refrigerant fluid in cooling and air-conditioning equipment since the 1960s, and it has also served as a traditional substitute for some chlorofluorocarbons (CFCs) controlled under the Montreal Protocol. A low frequency record on tropospher…	Atmospheric Chemistry and Physics
299	2013	Oelofse M., Jensen L.S., Magid J.	The implications of phasing out conventional nutrient supply in organic agriculture: Denmark as a case	Nutrient management; Organic agriculture; Organic fertilisers; Organic waste; Soil fertility management	Soil fertility management in organic systems, regulated by the organic standards, should seek to build healthy, fertile soils and reduce reliance on external inputs. The use of nutrients from conventional sources, such as animal manures from conventional farms, is currently permitted, with restrictions, in the organic regulations. However, the reliance of organic agriculture on the conventional s…	Organic Agriculture
300	2013	Gilardi G., Gullino M.L., Garibaldi A.	Critical aspects of grafting as a possible strategy to manage soil-borne pathogens	Colletotrichum coccodes; Phytophthora capsici; Phytophthora nicotianae; Solanaceaous crops	The management of soil-borne pathogens is nowadays complicated by the increasing restrictions in the usage of fumigants. Several factors need to be considered for a sustainable use of this practice such as the susceptibility of rootstocks against soil-borne pathogens which is age-dependent and the incomplete resistance of some of the rootstocks to one or more pathogens. There is an evidence of a …	Scientia Horticulturae
301	2013	Bayne S., Petersen P.E., Piper D., Schmalz G., Meyer D.	The challenge for innovation in direct restorative materials	alternative restorative material; dental amalgam; dental caries; prevention; recycling; risk assessment; WHO	During the past 50 years, a series of key UN conferences have established a framework to minimize human health risks from environmental exposures to key chemicals. In January 2013, more than 140 countries agreed to the text of new treaty to minimize Hg effects on the environment (the Minamata Convention). Dental caries is omnipresent around the globe, affecting 60% to 90% of school children and m…	Advances in dental research
302	2013	Carlile B., Coules A.	Towards sustainability in growing media	Biodiversity; Climate change; Peat; Peat alternatives; Social responsibility	Sustainability is commonly defined as the capacity to endure, with the World Summit of 2005 defining it as a reconciliation of environmental, social and economic demands: the three pillars of sustainability. In terms of sustainability of growing media, peat has been identified by environmental lobbyists as an unsustainable constituent in terms of habitat destruction and potential contribution to …	Acta Horticulturae
303	2013	Andersen S.O., Halberstadt M.L., Borgford-Parnell N.	Stratospheric ozone, global warming, and the principle of unintended consequences-An ongoing science and policy success story		In 1974, Mario Molina and F. Sherwood Rowland warned that chlorofluorocarbons (CFCs) could destroy the stratospheric ozone layer that protects Earth from harmful ultraviolet radiation. In the decade after, scientists documented the buildup and long lifetime of CFCs in the atmosphere; found the proof that CFCs chemically decomposed in the stratosphere and catalyzed the depletion of ozone; quantifi…	Journal of the Air and Waste Management Association
304	2013	Davis S.J., Cao L., Caldeira K., Hoffert M.I.	Rethinking wedges		Stabilizing CO2 emissions at current levels for fifty years is not consistent with either an atmospheric CO2 concentration below 500 ppm or global temperature increases below 2 °C. Accepting these targets, solving the climate problem requires that emissions peak and decline in the next few decades, and ultimately fall to near zero. Phasing out emissions over 50 years could be achieved by deployin…	Environmental Research Letters
305	2013	Michaelowa A.	The politics of climate change in Germany: Ambition versus lobby power		In 30 years of climate policy in Germany, a high level of declared ambition has coexisted with an eclectic mix of climate policy measures. Well-organized lobbies were either exempt from policy instruments such as the energy tax or directly benefitted from them, as in the case of the renewable feed-in tariff or windfall profits from free allocation of emissions allowances. As a result, German emis…	Wiley Interdisciplinary Reviews: Climate Change
306	2013	Milošević Z., Vesković M., Gavrilov M.B., Lukić T., Marković S.B.	Using natural disasters to instigate radical policy changes - The effect of Fukushima nuclear power plant accident on nuclear energy policies	Fukushima (Tohoku) earthquake; Natural disasters; Nuclear energy; Nuclear plant; Tsunami	Natural disasters and their effects have evolved to reflect the complexities of the physical and human environments, and their interactions in the modern world. After the earthquake and the tsunami of the Fukushima Daiichi nuclear reactors in March 2011 activists, lobbyist and reporters were quick to expose nuclear technology and demand if not an immediate closure, than at least a gradual phasing…	Acta Geographica Slovenica
307	2013	Skea J., Lechtenböhmer S., Asuka J.	Climate policies after Fukushima: Three views	climate change mitigation; energy policy; nuclear power; renewable energy	The 2011 Japanese earthquake and tsunami, and the consequent accident at the Fukushima nuclear power plant, have had consequences far beyond Japan itself. Reactions to the accident in three major economies Japan, the UK, and Germany, all of whom were committed to relatively ambitious climate change targets prior to the accident are examined. In Japan and Germany, the accident precipitated a major…	Climate Policy
308	2013	Huboyo H., Tohno S., Lestari P., Mizohata A., Okumura M., Utami P., Jara E.	Comparison between Jatropha curcas seed stove and woodstove: Performance and effect on indoor air quality	Carbon monoxide; Fine particles; Indoor air pollution; Size segregated distribution; Water boiling test	Jatropha curcas has been introduced and sold as cook stove fuel in Indonesia since late 2010, after the progressive phasing-out of the subsidy for kerosene started in 2007. To review the reliability and probable health impacts of J. curcas Seed (JCS) stoves used for cooking, the standard water boiling test (WBT) was used to evaluate the stove's basic performance (thermal efficiency and specific f…	Energy for Sustainable Development
309	2013	Selosse S., Ricci O., Maïzi N.	Fukushima's impact on the European power sector: The key role of CCS technologies	Carbon capture and storage; Climate change; Energy modeling; European Union policies; Nuclear phase out; TIAM-FR	The accident in Fukushima, Japan, in March 2011 has reactivated the discussion on how to meet ambitious climate mitigation objectives as some European countries reconsider the contribution of nuclear power in their energy mix. This study evaluates the impact of nuclear power reduction in Europe on the electricity mix under carbon emission reduction scenarios while considering the availability of …	Energy Economics
310	2013	Strid A., Bruhn C., Sverko E., Svavarsson J., Tomy G., Bergman Å.	Brominated and chlorinated flame retardants in liver of Greenland shark (Somniosus microcephalus)	1,2-Bis(2,4,6-tribromophenoxy)ethane; 2,3,5,6-Tetrabromo-p-xylene; Chlorinated paraffins; Iceland; Non-PBDE flame retardants; Pentabromoethylbenzene	Polybrominated diphenyl ethers (PBDEs) are known brominated flame retardants that have now been banned or phased out in many parts of the world. As a consequence, interest in the environmental occurrence of non-PBDE flame retardants has increased. In the present study several potential PBDE replacement products together with short chained chlorinated paraffins (SCCPs) were assessed in Greenland s…	Chemosphere
311	2013	Park N.-B., Yun S.-J., Jeon E.-C.	An analysis of long-term scenarios for the transition to renewable energy in the Korean electricity sector	Electricity scenarios; LEAP model; Renewable energy	This paper analyzes the energy, environmental and economic influences of three electricity scenarios in Korea by 2050 using the "Long-range Energy Alternatives Planning system" (LEAP) model. The reference year was 2008. Scenarios include the baseline (BL), new governmental policy (GP) and sustainable society (SS) scenarios. The growth rate of electricity demand in the GP scenario was higher than …	Energy Policy
312	2013	Galdos M., Cavalett O., Seabra J.E.A., Nogueira L.A.H., Bonomi A.	Trends in global warming and human health impacts related to Brazilian sugarcane ethanol production considering black carbon emissions	Biomass burning; Black carbon; Ethanol; Global warming; Particulate matter; Sugarcane	Sugarcane produced in Brazil has several environmental advantages. However, burning residues, which leads to GHG and black carbon (BC) emissions, has been used to facilitate manual harvest. BC emissions have a net warming effect and cause health problems. Mechanized harvest without burning is gradually replacing manually harvested burned sugarcane. Global warming potential (GWP) and human health …	Applied Energy
313	2013	Briski E., Allinger L.E., Balcer M., Cangelosi A., Fanberg L., Markee T.P., Mays N., Polkinghorne C.N., Prihoda K.R., Reavie E.D., Regan D.H., Reid D.M., Saillard H.J., Schwerdt T., Schaefer H., TenEyck M., Wiley C.J., Bailey S.A.	Multidimensional approach to invasive species prevention		Nonindigenous species (NIS) cause global biotic homogenization and extinctions, with commercial shipping being a leading vector for spread of aquatic NIS. To reduce transport of NIS by ships, regulations requiring ballast water exchange (BWE) have been implemented by numerous countries. BWE appears to effectively reduce risk for freshwater ports, but provides only moderate protection of marine po…	Environmental Science and Technology
314	2013	Bradford P.A.	How to close the US nuclear industry: Do nothing	Economics; Market; Nuclear construction; Nuclear energy; Nuclear plants; Nuclear power; United States	The United States is on course to all but exit the commercial nuclear power industry even if the country awakens to the dangers of climate change and adopts measures to favor low-carbon energy sources. Nuclear power had been in economic decline for more than three decades when the Bush administration launched a program that aimed to spark a nuclear power renaissance through subsidies and a reform…	Bulletin of the Atomic Scientists
315	2013	North E.J., Halden R.U.	Plastics and environmental health: The road ahead	Health effects; Plastics; Pollution; Sustainability; Sustainable consumption	Plastics continue to benefit society in innumerable ways, even though recent public focus on plastics has centered mostly on human health and environmental concerns, including their endocrine-disrupting properties and the long-term pollution they represent. The benefits of plastics are particularly apparent in medicine and public health. Plastics are versatile, cost-effective, require less energy…	Reviews on Environmental Health
316	2013	Schleier J.J., Peterson R.K.D.	A refined aquatic ecological risk assessment for a pyrethroid insecticide used for adult mosquito management	Mosquito management; Pest management; Pyrethroid; Risk analysis; Ultralow volume	The use of pyrethroid insecticides has increased substantially throughout the world over the past few decades as the use of organophorous, carbamate, and organochlorine insecticides is being phased out. Pyrethroids are the most common class of insecticides for ultralow-volume (ULV) aerosol applications used to manage high densities of adult mosquitoes. Pyrethroids are highly toxic to nontarget or…	Environmental Toxicology and Chemistry
317	2013	Tsai W.-T.	Environmental fate assessment of hydrofluoroolefins, new environment-friendly refrigerants	Decomposition product; Environmental fate; Health hazard; Hydrofluoro-olefins; Partition property	In response to recent regulations for the phase-out of 1,1,1,2- tetrafluoroethane (HFC-134a) from the refrigeration industry, two hydrofluoro-olefins (HFOs), 2,3,3,3-tetrafluoropropene (HFO-1234yf) and rra/is-1,3,3,3-tetrafluoropropene (HFO- 1234ze), have been currently developed as the environmentally friendly refrigerants due to the low global warming potential. However, the lack of environment…	Fresenius Environmental Bulletin
318	2013	Rogner M., Riahi K.	Future nuclear perspectives based on MESSAGE integrated assessment modeling	Energy scenarios; Global energy assessment; MESSAGE model; Nuclear energy	Nuclear energy has the potential to be a vital component toward a clean energy strategy - but future energy systems may or may not include nuclear power. This study explores a range of future nuclear pathways consistent with different levels of energy demand, and explicitly assesses the implications of a potential global nuclear energy phase-out. In our scenarios the mitigation of climate change …	Energy Strategy Reviews
319	2013	Lambertz J.F., Milojcic G.	Perspectives of the German lignite industry 2013 lignite - Partner and shaper [Perspektiven der deutschen Braunkohlenindustrie 20 16 Braunkohle - Partner und Impulsgeber]		Germany is an industrialised country and, perhaps more than any other nation, is linked economically with neighbouring states and integrated into the world economy. The importance of a competitive industry for our prosperity and well-being has been proved time and again in recent years. Germany as an industrial and economic location depends on competitive and sound energy and electricity supplies…	World of Mining - Surface and Underground
320	2013	Romero D., James J., Mora R., Hays C.D.	Study on the mechanical and environmental properties of concrete containing cathode ray tube glass aggregate	CRT; Durability; Glass recycling; Heavy metals; Sustainable concrete; Waste management	Cathode ray tube (CRT) glass is considered a hazardous material due to its lead toxicity. In addition, current disposal practices are being phased out due to their adverse environmental impacts. In this project, CRT glass was used as a fine aggregate replacement in concrete. Life-cycle material characterization was conducted by evaluating the durability and strength of the CRT-Concrete. Leaching …	Waste Management
321	2013	Wu J., Fang X., Xu W., Wan D., Shi Y., Su S., Hu J., Zhang J.	Chlorofluorocarbons, hydrochlorofluorocarbons, and hydrofluorocarbons in the atmosphere of four Chinese cities	Atmospheric concentration; CFCs; Emission; HCFCs; HFCs; Vehicle population	From July 2009-April 2011, 304 whole-air samples were collected at urban and suburban sites in four Chinese cities. The results indicated that recent chlorofluorocarbon (CFC) concentrations in all four cities are approaching Northern Hemispheric (NH) background levels, suggesting that the phase-out of CFCs in China is underway. However, hydrochlorofluorocarbon (HCFC) and 1,1,1,2-tetrafluoroethane…	Atmospheric Environment
322	2013	Robson M., Melymuk L., Bradley L., Treen B., Backus S.	Wet deposition of brominated flame retardants to the Great Lakes basin - Status and trends	Brominated flame retardants; Great Lakes; Spatial trends; Temporal trends; Wet deposition	This study examined the temporal and spatial trends in wet deposition of 19 legacy and emerging brominated flame retardants (14 polybrominated diphenyl ethers (PBDEs), 1,2-bis(2,4,6-tribromophenoxy)ethane (BTBPE), decabromodiphenylethane (DBDPE), hexabromocyclododecane (HBCD) and pentabromoethylbenzene (PBEB)) at 9 sites in the Canadian Great Lakes between 2004 and 2010. Concentrations of BDE-209…	Environmental Pollution
323	2013	Yang Z., Wu X.	Retrofits and options for the alternatives to HCFC-22	Flammability; Hydrocarbon; R22; Refrigerant; Replace	HCFC-22, widely used in variety of refrigerating/heating equipment, has been scheduled to be phased out by Montreal Protocol. This decision will result in significant reduction of ozone depletion and global warming, holding on the climate benefits accrued so far. In this paper, significant focuses were paid on the HCFC-22 elimination policies, advanced technologies, feasibility substitutes, revol…	Energy
324	2013	Sovacool B.K.	Energy policymaking in Denmark: Implications for global energy security and sustainability	Energy security index; Energy security indices; Energy sustainability	Denmark is arguably the most energy secure and sustainable country in the Organization of Economic Cooperation and Development (OECD). The country has reduced its dependence on foreign sources of energy to zero and become self-sufficient in its own energy production and use, offering important lessons for other nations around the world. This study explores the core of Denmark's successful approac…	Energy Policy
325	2013	Bahn O., Marcy M., Vaillancourt K., Waaub J.-P.	Electrification of the Canadian road transportation sector: A 2050 outlook with TIMES-Canada	Bottom-up energy modeling; Electric vehicles; Policy analysis	We use a newly developed bottom-up model of the entire Canadian energy system (TIMES-Canada) to assess potentials for electrification of the road transport sector. A special emphasis has been put on the modelling of the Canadian road transport, by considering a variety of vehicles for passenger and freight transportation. Besides a business-as-usual (baseline) scenario, we have analysed an energy…	Energy Policy
326	2013	Jägemann C., Fürsch M., Hagspiel S., Nagl S.	Decarbonizing Europe's power sector by 2050 - Analyzing the economic implications of alternative decarbonization pathways	Carbon capture and storage; Decarbonization costs; EU climate policy; Excess costs; Nuclear power; Renewable energies	The European Union aims to reduce greenhouse gas emissions by 80-95% in 2050 compared to 1990 levels. The transition towards a low-carbon economy implies the almost complete decarbonization of Europe's power sector, which could be achieved along various pathways. In this paper, we evaluate the economic implications of alternative energy policies for Europe's power sector by applying a linear dyna…	Energy Economics
327	2013	Terhonen E., Sun H., Buée M., Kasanen R., Paulin L., Asiegbu F.O.	Effects of the use of biocontrol agent (Phlebiopsis gigantea) on fungal communities on the surface of Picea abies stumps	454-Pyrosequencing; Biocontrol; Phlebiopsis gigantea; Stump treatment	One of the main objectives of sustainable forestry policies is to phase out, if possible, the use of chemical agents in forestry. The saprotrophic fungus Phlebiopsis gigantea has for several years been used as a biocontrol agent against the pathogen Heterobasidion annosum sensu lato. This pathogen is the major cause of root rot disease in conifers that results in economic losses estimated at 50 m…	Forest Ecology and Management
328	2014	De Cian E., Carrara S., Tavoni M.	Innovation benefits from nuclear phase-out: Can they compensate the costs?		This paper investigates whether an inefficient allocation of abatement due to constraints on the use of currently available low carbon mitigation options can promote innovation in new technologies and have a positive impact on welfare. We focus on the case of a nuclear power phase-out and endogenous technical change in energy efficiency and alternative low carbon technologies. The research is ins…	Climatic Change
329	2014	Duscha V., Schumacher K., Schleich J., Buisson P.	Costs of meeting international climate targets without nuclear power	climate policy; Copenhagen pledges; nuclear power; phase-out; post-Kyoto	The impact of a global phase-out of nuclear energy is assessed for the costs of meeting international climate policy targets for 2020. The analysis is based on simulations with the Prospective Outlook on Long-term Energy Systems (POLES) global energy systems model. The phase-out of nuclear power increases GHG emissions by 2% globally and 7% for Annex I countries. The price of certificates increas…	Climate Policy
330	2014	Knopf B., Pahle M., Kondziella H., Joas F., Edenhofer O., Bruckner T.	Germany's nuclear phase-out: Sensitivities and impacts on electricity prices and CO2 emissions	Climate protection; Electricity market modeling; Energiewende; Nuclear policy; Renewable energy	Following the nuclear meltdown in Fukushima Daiichi, in summer 2011 the German parliament decided to phase-out nuclear power by 2022. When this decision was taken, a number of model-based analyses investigated the influence this decision would have on electricity prices and CO2 emissions. They concluded that CO2 emissions would be kept at levels that are in line with national reduction targets bu…	Economics of Energy and Environmental Policy
331	2014	Schinko T., Bednar-Friedl B., Steininger K.W., Grossmann W.D.	Switching to carbon-free production processes: Implications for carbon leakage and border carbon adjustment	Border tariffs; Carbon leakage; Carbon-free production	Climate policy under partial global compliance raises concerns regarding carbon leakage. While border carbon adjustment (BCA) measures are a potential remedy, they have also been criticised on various grounds. This paper therefore investigates whether a policy fostering the switch to carbon-free technologies can substitute for BCAs. A reason for the effectiveness of a targeted technology policy i…	Energy Policy
332	2014	Marr S.	Climate and energy policy in the eu and Germany at a cross roads	eeg; Energy Efficiency - Renewable Energy; Erneuerbare Energien Gesetz; EU Climate and Energy Framework for 2020 to 2030; EU Climate and Energy Package; EU climate and energy policy; EU Emissions Trading Scheme; German Energiewende; German Energy Concept; nuclear phase out	For decades the EU claimed for itself political leadership in fighting climate change. Less than two years from now to the global climate conference in Paris (in 2015), however, the eu's climate policy stands at a cross roads: The EU can leave its impact weak or it decides to strengthen it showing global leadership in international climate policy making again. The situation is similar in Germany.…	Journal for European Environmental and Planning Law
333	2014	Magné B., Chateau J., Dellink R.	Global implications of joint fossil fuel subsidy reform and nuclear phase-out: An economic analysis		This paper uses the OECD's global recursive-dynamic general equilibrium model ENVLinkages to examine the mid-term economic consequences and the optimal energy supply mix adjustments of a simultaneous implementation of i) a progressive fossil fuel subsidy reform in emerging and developing economies and ii) a progressive phase out of nuclear energy, mostly affecting OECD countries, China and Russia…	Climatic Change
334	2014	Huang Q., Song J., Zhong Y., Peng P., Huang W.	Atmospheric depositional fluxes and sources apportionment of organochlorine pesticides in the Pearl River Delta region, South China	DDT; Deposition flux; Endosulfan; HCH; Pearl River Delta	Organochlorine pesticides (OCPs) have variously been phased out in agricultural activities, but they are still widely detected in air, water, and soil systems due to their recalcitrant nature in the environment. The purposes of this study were to assess potential OCP pollution via dry and wet deposition over the fast developing Pearl River Delta area with 41,700 km2, where the main effort has bee…	Environmental Monitoring and Assessment
335	2014	Cinnirella S., D'Amore F., Bencardino M., Sprovieri F., Pirrone N.	The GMOS cyber(e)-infrastructure: Advanced services for supporting science and policy	Database; Measurement campaigns; Mercury monitoring; Spatial Data Infrastructure; Web services	The need for coordinated, systematized and catalogued databases on mercury in the environment is of paramount importance as improved information can help the assessment of the effectiveness of measures established to phase out and ban mercury. Long-term monitoring sites have been established in a number of regions and countries for the measurement of mercury in ambient air and wet deposition. Lon…	Environmental Science and Pollution Research
336	2014	Griffin B., Buisson P., Criqui P., Mima S.	White Knights: Will wind and solar come to the rescue of a looming capacity gap from nuclear phase-out or slow CCS start-up?		In the wake of the Fukushima nuclear accident, countries like Germany and Japan have planned a phase-out of nuclear generation. Carbon capture and storage (CCS) technology has yet to become a commercially viable technology with little prospect of doing so without strong climate policy to spur development. The possibility of using renewable power generation from wind and solar as a non-emitting al…	Climatic Change
337	2014	Kaufman M.	Carbon sequestration, naturally		⋯sequestration strategies that are beneficial, safe, and natural have been ignored by most conventional climate scientists because they might not do the job by themselves. But as they reduce emissions and slow global warming they provide the time needed to phase out fossil fuels. We must insist that better farming methods and more tree crops should be promoted to sequester carbon dioxide and used…	Religious Humanism
338	2014	Rogelj J., Meinshausen M., Sedláček J., Knutti R.	Implications of potentially lower climate sensitivity on climate projections and policy		Climate sensitivity, the long-term temperature response to CO2, has been notoriously difficult to constrain until today. Estimates based on the observed warming trends favor lower values, while the skill with which comprehensive climate models are able to simulate present day climate implies higher values to be more plausible. We find that much lower values would postpone crossing the 2 °C temper…	Environmental Research Letters
339	2014	Su G., Saunders D., Yu Y., Yu H., Zhang X., Liu H., Giesy J.P.	Occurrence of additive brominated flame retardants in aquatic organisms from Tai Lake and Yangtze River in Eastern China, 2009-2012	HBCDs; PBDEs; Temporal investigation; Trophic level	Since the phase-out of PBDEs, reports regarding occurrences of these compounds in the environment have become less frequent. To characterize potential influences of the phase-out of PBDEs' on concentrations in the environment, trends in concentrations as a function of time were investigated for two additive brominated flame retardants, PBDEs and HBCDs. Three aquatic species, including shrimp, com…	Chemosphere
340	2014	Blanford G.J., Kriegler E., Tavoni M.	Harmonization vs. fragmentation: Overview of climate policy scenarios in EMF27		This paper synthesizes results of the multi-model Energy Modeling Forum 27 (EMF27) with a focus on climate policy scenarios. The study included two harmonized long-term climate targets of 450 ppm CO2-e (enforced in 2100) and 550 pm CO2-e (not-to-exceed) as well as two more fragmented policies based on national and regional emissions targets. Stabilizing atmospheric GHG concentrations at 450 and 5…	Climatic Change
341	2014	Hejazi M., Edmonds J., Clarke L., Kyle P., Davies E., Chaturvedi V., Wise M., Patel P., Eom J., Calvin K., Moss R., Kim S.	Long-term global water projections using six socioeconomic scenarios in an integrated assessment modeling framework	GCAM; Integrated assessment; Socioeconomic scenarios; Water consumption; Water scarcity; Water withdrawals	In this paper, we assess future water demands for the agricultural (irrigation and livestock), energy (electricity generation, primary energy production and processing), industrial (manufacturing and mining), and municipal sectors, by incorporating water demands into a technologically-detailed global integrated assessment model of energy, agriculture, and climate change - the Global Change Assess…	Technological Forecasting and Social Change
342	2014	Patel S.	Hong Kong mulls how to best replace coal power		Since March, Hong Kong has been considering two options as it prepares to phase out its coal-fired power plants to improve an enduring local and regional air quality and visibility crisis. One option calls for buying more power from coal-heavy mainland China and to increase self-sufficiency by increasing local power production from natural gas. The two options, proposed by the Hong Kong governmen…	Power
343	2014	Grunwald A.	Sustainability research as inter- and trans-disciplinary activity: The case of German Energiewende [Inter-i trans-dyscyplinarne badania nad zrównoważonościa{ogonek}: Przypadek niemieckiej Energiewende]	Social learning; Socio-technical systems; Sustainable energy supply; Transition management	Sustainability research shall provide knowledge for action and is therefore deeply related with social and political issues such as regulation, behaviour, value-added chains, daily routines of users, consumption patterns, economic incentives, perceptions, attitudes and values. It needs cooperation with social actors in diagnosing sustain-ability deficits and challenges, in determining priorities …	Problemy Ekorozwoju
344	2014	Lindahl P., Robèrt K.-H., Ny H., Broman G.	Strategic sustainability considerations in materials management	Framework for strategic sustainable development; Strategic; Sustainability; Sustainable materials management	Increasing awareness in business and society regarding socio-ecological impacts related to society's use of materials is a driver of new materials management practices. The aim of this study is to gain insight into what considerations come into focus and what types of solutions are revealed when companies apply a strategic sustainability perspective to materials management. Through literature rev…	Journal of Cleaner Production
345	2014	Kwan C.S., Takada H., Boonyatumanond R., Kato Y., Mizukawa K., Ito M., Dung L.Q., Zakaria M.P., Santiago E.C.	Historical occurrences of polybrominated diphenyl ethers and polychlorinated biphenyls in manila bay, philippines, and in the upper Gulf of Thailand	Anaerobic debromination; Passive air sample; PBDEs; PCBs; Pellet watch; Sediment cores	Historical trends of the accumulation of polybrominated diphenyl ethers (PBDEs) and polychlorinated biphenyls (PCBs) in a typical tropical Asian environment were investigated using radio-dated sediment cores from Manila Bay, the Philippines and from the upper Gulf of Thailand. Vertical profiles indicated earlier usage of PCBs than of PBDEs which coincided with their industrial production. The inc…	Science of the Total Environment
346	2014	van Wilgen B.W., Richardson D.M.	Challenges and trade-offs in the management of invasive alien trees	Biological invasions; Conflicts of interest; Economic assessments; Ecosystem services; Tree invasions	Over 430 alien tree species worldwide are known to be invasive, and the list is growing as more tree species are moved around the world and become established in novel environments. Alien trees can simultaneously bring many benefits and cause substantial environmental harm, very often leading to conflicts over how they should be managed. The impacts grow over time as invasions spread, and societa…	Biological Invasions
347	2014	Schwanitz V.J., Piontek F., Bertram C., Luderer G.	Long-term climate policy implications of phasing out fossil fuel subsidies	Climate change; Fossil fuel subsidies; Sustainable energy transformation	It is often argued that fossil fuel subsidies hamper the transition towards a sustainable energy supply as they incentivize wasteful consumption. We assess implications of a subsidy phase-out for the mitigation of climate change and the low-carbon transformation of the energy system, using the global energy-economy model REMIND. We compare our results with those obtained by the International Ener…	Energy Policy
348	2014	Pollitt H., Park S.-J., Lee S., Ueta K.	An economic and environmental assessment of future electricity generation mixes in Japan - an assessment using the E3MG macro-econometric model	Japan; Macroeconomic modelling; Nuclear	In this paper we consider future options for Japanese energy and climate policy. We assess the economic and environmental impacts of changing the share of electricity generated by nuclear power and varying the mid-term GHG targets. The quantitative approach we use is based on the global macro-econometric E3MG model.Our analysis reveals that the cost of denuclearisation to Japanese GDP is close to…	Energy Policy
349	2014	Karstensen K.H., Parlikar U.V., Ahuja D., Sharma S., Chakraborty M.A., Maurya H.P., Mallik M., Gupta P.K., Kamyotra J.S., Bala S.S., Kapadia B.V.	Destruction of concentrated chlorofluorocarbons in India demonstrates an effective option to simultaneously curb climate change and ozone depletion	Cement kilns; Environmentally sound destruction; GWP; Kyoto Protocol; Montreal Protocol; ODS	The Montreal Protocol aims to protect the stratospheric ozone layer by phasing out production of substances that contribute to ozone depletion, currently covering over 200 individual substances. As most of these compounds are synthetic greenhouse gases, there is an opportunity to curb both ozone depletion and climate change simultaneously by requiring Parties of both the Montreal and the Kyoto Pr…	Environmental Science and Policy
350	2014	Ganda F., Ngwakwe C.C.	Problems of sustainable energy in sub-Saharan Africa and possible solutions	Development finance; Sub-saharan africa (SSA); Sustainable energy	This paper examines the problems of promoting sustainable energy in sub-Saharan Africa (SSA) and suggests possible solutions. Using current literature, the major problems identified are: continued employment of fossil fuel subsidies; presence of monopoly structures in the energy sectors; regulatory and macroeconomic risks in sustainable energy schemes; large capital required to fund sustainable s…	Mediterranean Journal of Social Sciences
351	2014	Eklund B., Eklund D.	Pleasure boatyard soils are often highly contaminated	Antifouling paint; Boatyards; Metals; PAHs; PCBs; TBT (tributyltin)	The contamination in pleasure boatyards has been investigated. Measured concentrations of copper, zinc, lead, mercury, cadmium, tributyltin (TBT), the 16 most common polycyclic aromatic hydrocarbons (Σ16 PAHs), and the seven most common polychlorinated biphenyls (Σ7 PCBs) from investigations at 34 boatyards along the Swedish coast have been compiled. The maximum concentrations were 7,700 for Cu, …	Environmental Management
352	2014	Jiang Z., Lin B.	The perverse fossil fuel subsidies in China-The scale and effects	CGE model; Perverse fossil fuel subsidies; Price-gap approach	To address the problem of climate change, G-20 government leaders committed to "rationalize and phase-out inefficient fossil fuel subsidies that encourage excessive consumption over the medium term", i.e., removing the perverse subsidies. Considering China's particular circumstances and the purposes of energy subsidies, the perverse fossil fuel subsidies in China mainly concentrated on industries…	Energy
353	2014	Pavlova P.A., Schmid P., Bogdal C., Steinlin C., Jenk T.M., Schwikowski M.	Polychlorinated biphenyls in glaciers. 1. Deposition history from an Alpine ice core		We present a highly time-resolved historical record of polychlorinated biphenyls (PCBs) from an Alpine ice core (Fiescherhorn glacier, Switzerland). Introduced in the 1940s, PCBs were widely used industrial chemicals. Because of their persistence they are still found in the environment, long after their production phase-out. The Fiescherhorn ice core record covers the entire time period of indust…	Environmental Science and Technology
354	2014	Börjesson M., Ahlgren E.O., Lundmark R., Athanassiadis D.	Biofuel futures in road transport - A modeling analysis for Sweden	Biofuels; CO2; Energy system; MARKAL; Model; Road transport	First and second generation biofuels are among few low-carbon alternatives for road transport that currently are commercially available or in an early commercialization phase. They are thus potential options for meeting climate targets in the medium term. For the case of Sweden, we investigate cost-efficient use of biofuels in road transport under system-wide CO2 reduction targets to 2050, and th…	Transportation Research Part D: Transport and Environment
355	2014	Chen S.-J., Ding N., Zhu Z.-C., Tian M., Luo X.-J., Mai B.-X.	Sources of halogenated brominated retardants in house dust in an industrial city in southern China and associated human exposure	Exposure and risk; Halogenated brominated retardants; Indoor dust; Outdoor dust; Sources	Halogenated flame retardants (HFRs) are a class of ubiquitous pollutants in the environment and attract increasing attention. In the present study, HFR concentrations were measured in indoor and outdoor dust in an important industrial city (Dongguan) in southern China, in which their presence and associated human exposure are unknown. The HFRs were dominated by polybrominated diphenyl ethers (PBD…	Environmental Research
356	2014	Putz M., Schlegel A., Stoldt J., Franz E., Langer T.	Energy-sensitive control strategies for decoupled production systems	Control strategies; Decoupled production system; Energy efficiency; Manufacturing execution system; MES; Production control; Sustainable manufacturing	Rising demand for energy caused by emerging economies, decreasing oil stocks, and the intended nuclear phase-out in some industrial countries has led to new problems concerning sufficient and on time energy supply. Since availability of energy has a dramatic influence on production, energy has to be considered a process prerequisite instead of a production-related overhead topic, as usually done.…	International Journal of Sustainable Manufacturing
357	2014	Rogelj J., Schaeffer M., Meinshausen M., Shindell D.T., Hare W., Klimont Z., Velders G.J.M., Amann M., Schellnhuber H.J.	Disentangling the effects of CO2 and short-lived climate forcer mitigation	Air pollution; Black carbon; Carbon dioxide; Climate change mitigation; Short-lived climate forcers	Anthropogenic global warming is driven by emissions of a wide variety of radiative forcers ranging from very short-lived climate forcers (SLCFs), like black carbon, to very long-lived, like CO2. These species are often released from common sources and are therefore intricately linked. However, for reasons of simplification, this CO2-SLCF linkage was often disregarded in long-term projections of e…	Proceedings of the National Academy of Sciences of the United States of America
358	2014	Miller A., Elliott J.E., Elliott K.H., Guigueno M.F., Wilson L.K., Lee S., Idrissi A.	Spatial and temporal trends in brominated flame retardants in seabirds from the Pacific coast of Canada	Ancient murrelet; Brominated flame retardants; Leach's storm-petrel; Rhinoceros auklet; Stable isotopes	Polybrominated diphenyl ethers (PBDEs) and hexabromocyclododecane (HBCDD) are bioaccumulative flame retardants. PBDEs increased in many ecosystems during the late 20th century, but recently have declined in some environments. To examine trends in the northern Pacific, we analysed PBDEs, HBCDD and carbon and nitrogen stable isotopes (δ13C and δ15N) to account for dietary effects in archived eggs o…	Environmental pollution (Barking, Essex : 1987)
359	2014	Orehounig K., Mavromatidis G., Evins R., Dorer V., Carmeliet J.	Towards an energy sustainable community: An energy system analysis for a village in Switzerland	Energy hub; Energy scenarios; Neighbourhood; Renewables; Urban energy system	This paper aims to integrate decentralized energy systems in a village in Switzerland, which has the goal to phase out fossil fuels and rely on local renewable energy sources. To reach this ambitious target, a revision of the current energy system is required together with retrofitting of the building stock. The method applied is based on the energy hub concept, which can be used to optimize the …	Energy and Buildings
360	2014	Mankidy R., Ranjan B., Honaramooz A., Giesy J.P.	Effects of novel brominated flame retardants on steroidogenesis in primary porcine testicular cells	BFR; In vitro steroidogenesis; NBFR; TBB; TBCO; TBPH	Brominated flame retardants are chemicals with fire quenching properties which are extensively used in manufacturing. Historically, less regulated use of legacy brominated flame retardants (BFRs) for a number of years has resulted in ubiquitous contamination of the environment. As a result, some of the more persistent BFRs have been phased out and are being replaced by a next generation of bromin…	Toxicology Letters
361	2014	Katana J.	Three decades of soil solarization: Achievements and limitations	Greenhouse; Integrated control; IPM; Soil solarization	Soil solarization is based on the principle of heating the soil by mulching it with transparent film, thereby controlling soilborne pathogens and weeds. It is a simple, nonchemical and relatively inexpensive method. Soil solarization as we know it today was first introduced in 1976 in Israel. It has since been studied in over 70 developed and developing countries, in hot-climate regions but also …	Acta Horticulturae
362	2014	Sproul J., Wan M.P., Mandel B.H., Rosenfeld A.H.	Economic comparison of white, green, and black flat roofs in the United States	Building codes; Energy efficiency; Green roofs; Life-cycle cost analysis LCCA; Stormwater management; Urban heat island; White roofs	White and "green" (vegetated) roofs have begun replacing conventional black (dark-colored) roofs to mitigate the adverse effects of dark impervious urban surfaces. This paper presents an economic perspective on roof color choice using a 50-year life-cycle cost analysis (LCCA). We find that relative to black roofs, white roofs provide a 50-year net savings (NS) of $25/m2 ($2.40/ft2) and green roof…	Energy and Buildings
363	2014	Velders G.J.M., Solomon S., Daniel J.S.	Growth of climate change commitments from HFC banks and emissions		Chlorofluorocarbons (CFCs) are the primary cause of ozone depletion, and they also contribute to global climate change. With the global phaseout of CFCs and the coming phaseout of hydrochlorofluorocarbons (HCFCs), the substitute hydrofluorocarbons (HFCs) are increasingly used. While CFCs were originally used mainly in applications such as spray cans and were released within a year after productio…	Atmospheric Chemistry and Physics
364	2014	Kunwar S., Paret M.L., Olson S.M., Ritchie L., Rich J.R., Freeman J., McAvoy T.	Grafting using rootstocks with resistance to ralstonia solanacearum against Meloidogyne incognita in tomato production		Root-knot nematodes (RKNs; Meloidogyne spp.) and Ralstonia solanacearum, the causal agent of bacterial wilt, are major soilborne pathogens in U.S. tomato production. Methyl bromide has been used for decades to effectively manage RKN but its phase-out and the high cost of other effective fumigants such as 1,3-dichloropropene has resulted in a need to develop sustainable alternatives. Many of the c…	Plant Disease
365	2014	Colla P., Garibaldi A., Gullino M.L.	Consequences of european pesticide policies enforcement in soil disinfestation sector	Fumigants; Soil-borne pathogens; Vegetables	Soil-borne pathogens cause serious losses in vegetable crops, especially in intensive cultivation cropping systems. Soil disinfestation is usually carried out for their containment and it has been based for years on the use of methyl bromide, whose phasing-out under the Montreal Protocol has been enabled by the presence of alternative products, such as 1,3-dichloropropene, chloropicrin and methyl…	Acta Horticulturae
366	2014	Castellá-Lorenzo G., Savigliano R., Pizano M.	Breaking the bondage to methyl bromide in agriculture - UNIDO experience	Biocontrol; Biofumigation; Compost; Grafting; Ozone depleting substances; Soilless production; Sustainable production	For decades, methyl bromide was used as the fumigant of choice to rid the soil of noxious pests, diseases and weeds in the pre-plat stage, particularly in intensive agriculture around the world. Breaking the chains of the methyl bromide bondage by 2015 in developing countries - As set by the Montreal Protocol on the Substances Depleting Ozone Layer - has been a great challenge, but at the same ha…	Acta Horticulturae
367	2014	Savigliano R., Hanich Z., Pugliese M., Pizano M.	High quality compost: A promising future for sustainable agro-industry in Morocco	Methyl bromide; Montreal protocol; Ozone layer protection; Soil health management; Sustainable agriculture; UNIDO	Intensive horticulture has developed substantially in Morocco over the last decades, with many associated benefits. However, it has also brought by a dramatic increase in the consumption of chemicals such as fertilizers and pesticides, including fumigants. Among these, methyl bromide, once widely used for the control of soilborne pests and diseases, is subjected to controls and phase-out under th…	Acta Horticulturae
368	2014	Mattner S.W., Milinkovic M., Merriman P.R., Porter I.J.	Critical challenges for the phase-out of methyl bromide in the Australian strawberry industry	Certification scheme; Soil fumigants; Soilless systems; Strawberry runners	The Australian strawberry industry has trialled substitutes to methyl bromide (MB)/chloropicrin (Pic) mixtures for soil disinfestation since 1995. The research supported the registration of Pic and 1,3-dichloropropene (1,3-D)/Pic products in Australia, and these were rapidly adopted by the strawberry fruit industry in 2006. This transition reduced emissions of MB to the atmosphere by 120 t pa. Ge…	Acta Horticulturae
369	2014	Mukhopadhyay S.S.	Nanotechnology in agriculture: Prospects and constraints	Clay minerals; Crop production; Crop protection; Farming; Food; Nanocomposites; Nanofabrication; Nanotechnology	Attempts to apply nanotechnology in agriculture began with the growing realization that conventional farming technologies would neither be able to increase productivity any further nor restore ecosystems damaged by existing technologies back to their pristine state; in particular because the long-term effects of farming with "miracle seeds", in conjunction with irrigation, fertilizers, and pestic…	Nanotechnology, Science and Applications
370	2014	Seiber J.N., Coats J., Duke S.O., Gross A.D.	Biopesticides: State of the Art and Future Opportunities	bioherbicides; bionematicides; biopesticides; plant-incorporated protectants; semiochemicals	The use of biopesticides and related alternative management products is increasing. New tools, including semiochemicals and plant-incorporated protectants (PIPs), as well as botanical and microbially derived chemicals, are playing an increasing role in pest management, along with plant and animal genetics, biological control, cultural methods, and newer synthetics. The goal of this Perspective is…	Journal of Agricultural and Food Chemistry
371	2015	Deb S., Chana S.	Biomaterials in Relation to Dentistry		Dental caries remains a challenge in the improvement of oral health. It is the most common and widespread biofilm-dependent oral disease, resulting in the destruction of tooth structure by the acidic attack from cariogenic bacteria. The tooth is a heavily mineralised tissue, and both enamel and dentine can undergo demineralisation due to trauma or dietary conditions. The adult population worldwid…	Frontiers of oral biology
372	2015	Garas G., Bakhoum E., Allam M.	Rice straw-cementitious bricks: Analytical study on mechanical properties and sustainability measures	Agro- wastes recycling; Cementitious - rice straw brick; Chopped rice straw; Sustainability measures	The methods for disposing of the straw remaining in the fields after rice harvest are either burning or baling. Due to the lack of adequate baling machines available to serve most farmers, burning is still the principal disposal method for most of the rice straw residue, as it is efficient, effective and cheap, even after being phased out in the Egyptian law of Environment number 4-1994. As a res…	ARPN Journal of Engineering and Applied Sciences
373	2015	Goonan S., Mirosa M., Spence H.	Systems-practice framework: An integrated approach for foodservice management	Environment; Food service; Practice; Social research	Aim: There is increasing pressure on foodservice organisations to improve the sustainability of their operations and to do so practitioners must be equipped with appropriate tools. In this paper, a tool to guide management strategies for pro-environmental behaviour change is introduced. The tool is based on a new framework that combines two existing models: the widely used foodservice 'systems mo…	Nutrition and Dietetics
374	2015	Mota-Babiloni A., Navarro-Esbrí J., Barragán-Cervera Á., Molés F., Peris B.	Analysis based on EU Regulation No 517/2014 of new HFC/HFO mixtures as alternatives of high GWP refrigerants in refrigeration and HVAC systems	Air conditioning; EU Regulation No 517/2014; GWP; HFC replacement; HFO/HFC mixtures; Refrigeration	The EU Regulation No 517/2014 is going to phase-out most of the refrigerants commonly used in refrigeration and air conditioning systems (R134a, R404A and R410A) because of their extended use and their high GWP values. There are very different options to replace them; however, no refrigerant has yet imposed. In this paper we review and analyze the different mixtures proposed by the AHRI as altern…	International Journal of Refrigeration
375	2015	Mohapatra D., Kar A., Giri S.K.	Insect Pest Management in Stored Pulses: an Overview	Bruchids; Dielectric heating; Inert dusts; Irradiation; Plant derivatives; Pulses; Storage; Sunning	Pulses, which constitute an important part in the daily diet of mostly the vegetarian population, suffer a great damage by insects during storage. In this review, different control measures such as chemical treatment, physical treatment, and biological control of insects in stored pulses are discussed in brief. Chemicals like methyl bromide, malathion, and dichlorvos are being phased out. In thes…	Food and Bioprocess Technology
376	2015	Behl M., Hsieh J.-H., Shafer T.J., Mundy W.R., Rice J.R., Boyd W.A., Freedman J.H., Hunter E.S., III, Jarema K.A., Padilla S., Tice R.R.	Use of alternative assays to identify and prioritize organophosphorus flame retardants for potential developmental and neurotoxicity	Caenorhabditis elegans; Developmental toxicity; Embryonic stem cells; Flame retardants; Neurotoxicity; Zebrafish	Due to their toxicity and persistence in the environment, brominated flame retardants (BFRs) are being phased out of commercial use, leading to the increased use of alternative chemicals such as the organophosphorus flame retardants (OPFRs). There is, however, limited information on the potential health effects of OPFRs. Due to the structural similarity of the OPFRs to organophosphorus insecticid…	Neurotoxicology and Teratology
377	2015	Lysack M.	Effective policy influencing and environmental advocacy: Health, climate change, and phasing out coal	Climate change; coal phasing-out; environmental advocacy; health; policy influencing	Coal is a key contributor to greenhouse gas emissions responsible for climate change. Alberta, a Canadian province, burns more coal for its electricity than the rest of Canada combined, emitting pollution impacting human and ecosystem health. This article profiles a policy-influencing alliance of health and environmental non-governmental organizations (NGOs) and explores the role of social work i…	International Social Work
378	2015	Schwanitz V.J., Longden T., Knopf B., Capros P.	The implications of initiating immediate climate change mitigation - A potential for co-benefits?	Climate policy; Co-benefits; Energy modeling; European Union Roadmap; Fragmented climate action; Integrated assessment	Fragmented climate policies across parties of the United Nations Framework on Climate Change have led to the question of whether initiating significant and immediate climate change mitigation can support the achievement of other non-climate objectives. We analyze such potential co-benefits in connection with a range of mitigation efforts using results from eleven integrated assessment models. The…	Technological Forecasting and Social Change
379	2015	Gusbin D.	The impact of EU Climate/Energy policies on Belgium's energy dependence up to 2050	Climate policy; Energy policy; Fossil fuels; Long-term Energy projections; Renewable Energy Sources; Supply security.	In 2013, the European Commission designed a set of energy dependence indicators in order to look at the evolution of Member States' energy dependence over recent years. For a country such as Belgium, this type of evaluation is particularly relevant because Belgian ground does not contain any indigenous fossil fuel resource, the potential of renewable energy sources is relatively limited, and nucl…	Reflets et Perspectives de la Vie Economique
380	2015	Qvist S.A., Brook B.W.	Environmental and health impacts of a policy to phase out nuclear power in Sweden	Climate change; Co2 emissions; Electricity production; Health impact; Nuclear power	Nuclear power faces an uncertain future in Sweden. Major political parties, including the Green party of the coalition-government have recently strongly advocated for a policy to decommission the Swedish nuclear fleet prematurely. Here we examine the environmental, health and (to a lesser extent) economic impacts of implementing such a plan. The process has already been started through the early …	Energy Policy
381	2015	Winid B.	Environmental threats of natural water contamination with polybrominated diphenyl ethers (PBDEs)	Brominated flame retardants; Environmental occurrence; PBDE; Water contamination	Polybrominated diphenyl ethers (PBDEs) are a class of synthetic halogenated organic compounds used in numerous polymer-based commercial and household products such as textiles, furniture, and electronics, to increase their flame ignition resistance and to meet increasingly strict fire safety standards. Release of PBDEs to the environment can occur during manufacturing and processing operations, t…	Polish Journal of Environmental Studies
382	2015	La Védrine M.A.G., Sheahan D.A., Gioia R., Rowles B., Kroeger S., Phillips C., Kirby M.F.	Substitution of hazardous offshore chemicals in UK waters: An evaluation of their use and discharge from 2000 to 2012	Chemical management; Chemical substitution; Offshore oil and gas; Ospar	The offshore oil and gas industry will use and discharge large quantities of chemicals into the marine environment during operational activities, with some of those chemicals considered hazardous. Chemical substitution, as part of the environmental regulatory regime, has been advocated as a simple and effective tool to reduce inputs of hazardous substances to the environment. In 2007 the UK Natio…	Journal of Cleaner Production
383	2015	Johnson N., Krey V., McCollum D.L., Rao S., Riahi K., Rogelj J.	Stranded on a low-carbon planet: Implications of climate policy for the phase-out of coal-based power plants	CCS retrofit; Coal-based electricity generation without CCS; Integrated assessment modeling; Near-term climate policy; Premature retirement; Stranded capacity	Limiting global warming to 2. °C will likely entail the complete phase-out of coal-based electricity generation without carbon capture and storage (CCS). The timing and rate of this phase-out will depend on the stringency of near-term climate policy and will have important implications for the stranding of coal power plant capacity without CCS. The objectives of this paper are to better understan…	Technological Forecasting and Social Change
384	2015	Altarawneh M., Dlugogorski B.Z.	Formation of polybrominated dibenzofurans from polybrominated biphenyls	Brominated flame retardants (BFRs); DFT; Polybrominated biphenyls (PBBs); Polybrominated dibenzofurans (PBDFs)	Decades after phasing out their production and use, especially in the formulations of brominated flame retardants (BFRs), polybrominated biphenyls (PBBs) still pose serious environmental and health problems. The oxidation of PBB has been hypothesised as a pathway for the formation of the notorious polybrominated dibenzofurans (PBDFs) and their dispersion in the environment. However, the exact rea…	Chemosphere
385	2015	Babarinde T.O., Ohunakin O.S., Adelekan D.S., Aasa S.A., Oyedepo S.O.	Experimental study of LPG and R134a refrigerants in vapor compression refrigeration	Domestic refrigerator; Experimental; LPG; R134a	Natural refrigerants, such as hydrocarbons, have been renewed in recent years as a result of the environmental problems associated with chlorofluorocarbon (CFC) and hydro-chlorofluorocarbon (HCFC) refrigerants. Due to the depletion of the ozone layer and global warming effects, synthetic refrigerants are being gradually phased out in accordance with the international protocols that aim to protect…	International Journal of Energy for a Clean Environment
386	2015	Yu M., Halog A.	Solar photovoltaic development in Australia-a life cycle sustainability assessment study	Australia; Energy payback time (EPBT); Grid parity; LCOE; LCSA; Social sustainability; Solar PV; UQ solar	Australia possesses the highest average solar radiation of any continent in the world, but solar energy in total contributes less than 1% to Australia's primary energy consumption. This study intends to assess whether solar photovoltaic (PV) is really a sustainable option for Australia's energy transition on the project level. A life cycle sustainability assessment (LCSA) was conducted on a 1.2 M…	Sustainability (Switzerland)
387	2015	Komiyama R., Fujii Y.	Long-term scenario analysis of nuclear energy and variable renewables in Japan's power generation mix considering flexible power resources	Nuclear; Power generation mix; Rechargeable battery; Variable renewable	This paper comprehensively analyzes an optimal deployment of variable renewables (VRs) with flexible power resources, such as electricity saving and rechargeable battery, in Japan's long-term power generation mix to 2050 under possible nuclear energy scenarios. The study is performed, employing a dynamic high time-resolution optimal power generation mix model which is formulated as a large-scale …	Energy Policy
388	2015	Land M., De Wit C.A., Cousins I.T., Herzke D., Johansson J., Martin J.W.	What is the effect of phasing out long-chain per- and polyfluoroalkyl substances on the concentrations of perfluoroalkyl acids and their precursors in the environment? A systematic review protocol	Concentration; Emission; Environmental fate; Perfluoroalkane acids; Perfluoroalkyl acids; PFOA; PFOS; Phase-out; Regulation; Source; Temporal trends	Background: There is a growing concern in Sweden and elsewhere that continued emissions of per- and polyfluoroalkyl substances (PFASs) may cause environmental as well as human health effects. PFASs are a broad class of man-made substances that have been produced and used in both commercial products and industrial processes for more than 60 years. Although the production and use of some PFASs has …	Environmental Evidence
389	2015	You M.	Interpretation of the source-specific substantive control measures of the Minamata Convention on Mercury	International environmental regime; Mercury; Minamata Convention; Source-specific	Being persistent, toxic, and bio-accumulative, Mercury (Hg) seriously affects the environment and human health. Due to Hg's attribute of long-range environmental transport across national borders, especially through atmospheric transport, no country can fully protect its environment and human health with its own efforts, without global cooperation. The Minamata Convention on Mercury, which was fo…	Environment International
390	2015	Gomis M.I., Wang Z., Scheringer M., Cousins I.T.	A modeling assessment of the physicochemical properties and environmental fate of emerging and novel per- and polyfluoroalkyl substances	Environmental fate; Fluorinated alternative; Hazard assessment; In silico tool; PFOA; PFOS	Long-chain perfluoroalkyl carboxylic acids (PFCAs) and perfluoroalkane sulfonic acids (PFSAs) are persistent, bioaccumulative, and toxic contaminants that are globally present in the environment, wildlife and humans. Phase-out actions and use restrictions to reduce the environmental release of long-chain PFCAs, PFSAs and their precursors have been taken since 2000. In particular, long-chain poly-…	Science of the Total Environment
391	2015	Moreno J., Fatela F., Leorri E., Araújo M.F., Moreno F., De la Rosa J., Freitas M.C., Valente T., Corbett D.R.	Bromine enrichment in marsh sediments as a marker of environmental changes driven by Grand Solar Minima and anthropogenic activity (Caminha, NW of Portugal)	Anthropogenic impacts; Biogenic CH3Br emissions; Bromine; NW Iberia; Solar activity; Tidal marsh	A sediment core collected in Caminha tidal marsh, NW Portugal, was used to assess bromine (Br) signal over the last ca. 1700years. The Br temporal variability reflects its close relationship with soil/sediment organic matter (OM) and also alterations in Br biogeochemical recycling in marsh environment. The highest Br enrichment in sediments was found during the Maunder Solar Minimum, a major sola…	Science of the Total Environment
392	2015	Peshin S.S., Halder N., Jathikarta C., Gupta Y.K.	Use of mercury-based medical equipments and mercury content in effluents of tertiary care hospitals in India	Hospital effluents; Medical equipments; Mercury	Environmental pollution due to mercury has raised serious concern over the last few decades. Various anthropogenic sources including the health sector play a vital role in increasing the mercury load on the environment. Mercury poses an important health issue because of its indiscriminate disposal into the environment. There are numerous mercury-containing devices being used in the health-care se…	Environmental Monitoring and Assessment
393	2015	Liu L., Li H., Wang Z., Liu R., Zhang Y., Lin K.	Insights into spatially and temporally co-occurring polybrominated diphenyl ethers in sediments of the East China Sea	Co-occurrence correlations; East China Sea; Network; PBDEs; Sediment	In this study, twenty-four core sediment samples were collected from monitoring stations in the East China Sea (ECS) to investigate the spatial and temporal distributions of polybrominated diphenyl ethers (PBDEs) and their potential sources. In surface sediment samples (the top 0-3cm segment), the concentrations of σ8PBDEs (sum of BDE15, 28, 47, 99, 100, 153, 154 and 183) and BDE209 were between …	Chemosphere
394	2015	Figi R., Nagel O., Schreiner C., Hagendorfer H.	Determination of non-gaseous and gaseous mercury fractions in unused fluorescent lamps: A study of different lamp types	atomic absorption spectroscopy; fluorescent lamps; Mercury speciation; Regulation 2011/65/EU; wet chemistry	Since incandescent light bulbs have been phased out in the European Union from 2009, the use of fluorescent lamps has drastically increased as a reliable, more energy-efficient and cost-effective alternative. State-of-the-art fluorescent lamps are dependent on mercury/mercury alloys, posing a risk for the consumer and the environment, and appropriate waste management is challenging. Consequently …	Waste Management and Research
395	2015	Yao P.-H., Shyu G.-S., Chang Y.-F., Chou Y.-C., Shen C.-C., Chou C.-S., Chang T.-K.	Lead isotope characterization of petroleum fuels in Taipei, Taiwan	Environmental forensics; Petroleum fuels; Stable lead isotopes	Leaded gasoline in Taiwan was gradually phased out from 1983 to 2000. However, it is unclear whether unleaded gasoline still contributes to atmospheric lead (Pb) exposure in urban areas. In this study, Pb isotopic compositions of unleaded gasolines, with octane numbers of 92, 95, 98, and diesel from two local suppliers in Taipei were determined by multi-collector inductively coupled plasma mass s…	International Journal of Environmental Research and Public Health
396	2015	Nagase H., Kinnison D.E., Petersen A.K., Vitt F., Brasseur G.P.	Effects of injected ice particles in the lower stratosphere on the Antarctic ozone hole	geoengineering	The Antarctic ozone hole will continue to be observed in the next 35-50 years, although the emissions of chlorofluorocarbons (CFCs) have gradually been phased out during the last two decades. In this paper, we suggest a geo-engineering approach that will remove substantial amounts of hydrogen chloride (HCl) from the lower stratosphere in fall, and hence limit the formation of the Antarctic ozone …	Earth's Future
397	2015	Fantke P., Weber R., Scheringer M.	From incremental to fundamental substitution in chemical alternatives assessment	Chemical alternatives assessment; Consumer products; Fundamental substitution; Green Chemistry; Hazardous substances phase-out; Life-cycle impacts	Several chemicals in consumer products are subject to binding or voluntary phase-out agreements that are based on international treaties such as the Stockholm Convention on Persistent Organic Pollutants or on regulatory frameworks such as the European Union's Registration, Evaluation, Authorization and Restriction of Chemicals (REACH). To facilitate a phase-out process, alternatives assessment is…	Sustainable Chemistry and Pharmacy
398	2015	Gonzalez M., Taddonio K.N., Sherman N.J.	The Montreal Protocol: how today’s successes offer a pathway to the future	Climate change; HFCs; Hydrofluorocarbons; Montreal Protocol; Ozone hole; Precautionary principle	The Montreal Protocol on Substances that Deplete the Ozone Layer (Montreal Protocol) is widely considered to be the most successful multilateral environmental agreement (MEA) because: 1) it is working to protect the ozone layer, 2) it is the only treaty that enjoys universal membership, and 3) both developing and developed countries are committed to phasing out controlled ozone-depleting substanc…	Journal of Environmental Studies and Sciences
399	2015	Gareau B.J.	Lessons from the Montreal Protocol delay in phasing out methyl bromide	Climate change; Command and control regulation; Methyl bromide; Montreal Protocol; Ozone layer; Ozone-depleting substances (ODSs); Precaution; Precautionary principle	The Montreal Protocol is the most successful global environmental agreement in history and a shining example of a current generation taking extraordinary precaution in avoiding environmental impacts to future generations. The delayed methyl bromide phaseout, however, alerts us to serious problems that can arise—even in this extraordinary agreement—when actors are allowed to place profit and polit…	Journal of Environmental Studies and Sciences
400	2015	Shende R.	Networking to save the world: UNEP’s regional networks—conflict resolution in action	Montreal protocol; National ozone officers; National ozone units; Regional networks; United Nations Environment Programme	The success of the Montreal Protocol in achieving global participation in the phase-out and phasedown of ozone-depleting chemicals can be attributed in large part to regional networks of experts instituted by the United Nations Environment Programme (UNEP) in 1991. ‘Regional Networks’ were set up to help developing countries meet their compliance obligations under the Montreal Protocol and are fi…	Journal of Environmental Studies and Sciences
401	2015	Andersen S.O.	Lessons from the stratospheric ozone layer protection for climate	Carbon capture and utilization; Climate; Leadership companies; Learn by doing; Montreal Protocol; Performance not prescription; Recruit, empower, and reward; Start and strengthen; Stratospheric ozone; Welcome technology and celebrate success	Ozone protection was the result of professional confidence and sacrifice; brilliant interdisciplinary science and the good fortune of an ozone hole with no explanation other than manufactured fluorocarbons; and industry and government leadership inspired by the realization that life on earth was in jeopardy. In response to the 1974 warning by Dr. Mario Molina and Dr. F. Sherwood Rowland that chlo…	Journal of Environmental Studies and Sciences
402	2015	Langston W.J., Pope N.D., Davey M., Langston K.M., O' Hara S.C.M., Gibbs P.E., Pascoe P.L.	Recovery from TBT pollution in English Channel environments: A problem solved?	Dogwhelks; English Channel; Recovery; Scrobicularia plana; TBT	Following recognition of effects in the 1980s, tributyltin (TBT) has been monitored at sites in the English Channel to evaluate the prognosis for biota - spanning the introduction of restrictions on TBT use on small boats and the recent phase-out on the global fleet. We describe how persistence and impact of TBT in clams Scrobicularia plana has changed during this period in Southampton Water and …	Marine Pollution Bulletin
403	2015	Briski E., Gollasch S., David M., Linley R.D., Casas-Monroy O., Rajakaruna H., Bailey S.A.	Combining Ballast Water Exchange and Treatment To Maximize Prevention of Species Introductions to Freshwater Ecosystems		The most effective way to manage species transfers is to prevent their introduction via vector regulation. Soon, international ships will be required to meet numeric ballast discharge standards using ballast water treatment (BWT) systems, and ballast water exchange (BWE), currently required by several countries, will be phased out. However, there are concerns that BWT systems may not function rel…	Environmental Science and Technology
404	2015	Yu Y., Hung H., Alexandrou N., Roach P., Nordin K.	Multiyear Measurements of Flame Retardants and Organochlorine Pesticides in Air in Canadas Western Sub-Arctic		Fourteen polybrominated diphenyl ethers (PBDEs), 14 non-BDE flame retardants (FRs), and 25 organochlorine pesticides (OCPs) were analyzed in air samples collected at Little Fox Lake (LFL) in Canadas Yukon Territory from August 2011 to December 2014. LFL is a long-term monitoring station operated under the Northern Contaminants Program (NCP) and one of only a few stations that contribute to the as…	Environmental Science and Technology
405	2015	Börjesson M., Athanassiadis D., Lundmark R., Ahlgren E.O.	Bioenergy futures in Sweden - system effects of CO2 reduction and phase out of fossil fuels	Biofuels; Biomass; Climate policy; Energy system; Greenhouse gas; MARKAL; Model; Scenario	Bioenergy could contribute both to the reduction of greenhouse gases and to increased energy security, but the extent of this contribution strongly depends on the cost and potential of biomass resources. For Sweden, this study investigates how the implementation of policies for CO2 reduction and for phase out of fossil fuels in road transport affect the future utilization of biomass, in the stati…	GCB Bioenergy
406	2015	Sovacool B.K.	The political economy of pollution markets: Historical lessons for modern energy and climate planners	Emissions reduction credits; Market mechanisms; Pollution permits; Tradable permits	This article explores some of the central economic and political problems with the use of tradable permits to solve environmental problems. Drawing from transaction cost economics, political economy, and market theory, it does so by looking at the history of three programs for curbing pollution in the United States - the Clean Air Act, the leaded gasoline phase-out, and water permits in Wisconsin…	Renewable and Sustainable Energy Reviews
407	2015	Nardelli T.C., Erythropel H.C., Robaire B.	Toxicogenomic screening of replacements for Di(2-Ethylhexyl) phthalate (DEHP) using the immortalized TM4 sertoli cell line		Phthalate plasticizers such as di(2-ethylhexyl) phthalate (DEHP) are being phased out of many consumer products because of their endocrine disrupting properties and their ubiquitous presence in the environment. The concerns raised from the use of phthalates have prompted consumers, government, and industry to find alternative plasticizers that are safe, biodegradable, and have the versatility for…	PLoS ONE
408	2015	Liang S.-K., Pearson S., Wu W., Ma Y.-J., Qiao L.-L., Wang X.H., Li J.-M., Wang X.-L.	Research and integrated coastal zone management in rapidly developing estuarine harbours: A review to inform sustainment of functions in Jiaozhou Bay, China	China; Coastal development; Habitat damage assessment; Harbour; Jiaozhou bay; Land reclamation; Marine environmental management; Water quality control	China's Jiaozhou Bay is an important example of integrated coastal zone management because it has received scientific and management attention and becomes useful to other coastal managers and researchers experiencing similar challenges. Water research shows that the condition of the environment is dominated by overwhelming nutrient flows and land reclamation that has reduced the ecosystem's abili…	Ocean and Coastal Management
409	2015	Lindley B.A., Fiorina C., Gregg R., Franceschini F., Parks G.T.	The effectiveness of full actinide recycle as a nuclear waste management strategy when implemented over a limited timeframe - Part I: Uranium fuel cycle	Decay heat; Fast reactor; Fuel cycle; Radiotoxicity; Spent nuclear fuel; Transmutation	Disposal of spent nuclear fuel is a major political and public-perception problem for nuclear energy. From a radiological standpoint, the long-lived component of spent nuclear fuel primarily consists of transuranic (TRU) isotopes. Full recycling of TRU isotopes can, in theory, lead to a reduction in repository radiotoxicity to reference levels corresponds to the radiotoxicity of the unburned natu…	Progress in Nuclear Energy
410	2015	Saldarriaga-Isaza A., Villegas-Palacio C., Arango S.	Phasing out mercury through collective action in artisanal gold mining: Evidence from a framed field experiment	Co-management; Economic experiment; Exclusion; Mercury pollution; Small-scale gold mining	The application of practices such as mercury amalgamation makes small-scale gold mining an economic activity with a high negative impact on health and the environment. Associative entrepreneurship - collective action - has been proposed as a scheme that would bring cleaner technologies to miners, in order to reduce the harmful effects of using mercury in the gold recovery. In this paper we invest…	Ecological Economics
411	2015	Popp J., Jambor A.	On the Consistency of the CAP: Will European Agriculture Meet the Challenges It Faces?		The latest reform of the Common Agricultural Policy has just been accepted, identifying important challenges for EU agriculture but proposing only limited changes to existing policy. Now it is time for the implementation of new measures. However, from a theoretical point of view, it seems that the CAP can hardly meet the challenges it faces due to the inconsistencies between the predefined challe…	EuroChoices
412	2015	Velders G.J.M., Fahey D.W., Daniel J.S., Andersen S.O., McFarland M.	Future atmospheric abundances and climate forcings from scenarios of global and regional hydrofluorocarbon (HFC) emissions	Climate; CO2-eq emissions; HFC; Montreal Protocol; Radiative forcing	Hydrofluorocarbons (HFCs) are manufactured for use as substitutes for ozone-depleting substances that are being phased out globally under Montreal Protocol regulations. While HFCs do not deplete ozone, many are potent greenhouse gases that contribute to climate change. Here, new global scenarios show that baseline emissions of HFCs could reach 4.0-5.3 GtCO2-eq yr-1 in 2050. The new baseline (or b…	Atmospheric Environment
413	2016	Heede R., Oreskes N.	Potential emissions of CO2 and methane from proved reserves of fossil fuels: An alternative analysis	Carbon bubble; Carbon dioxide CO2 methane CH4; Coal; Crude oil; Emissions; Fossil fuels; Investor-owned; Major carbon producers; Natural gas; Proved reserves; State-owned; Stranded assets	Scientists have argued that no more than 275GtC (IPCC, 2013) of the world's reserves of fossil fuels of 746GtC can be produced in this century if the world is to restrict anthropogenic climate change to ≤2°C. This has raised concerns about the risk of these reserves becoming "stranded assets" and creating a dangerous "carbon bubble" with serious impacts on global financial markets, leading in tur…	Global Environmental Change
414	2016	Zhang S., Qin X.	Promoting large and closing small in China's coal power sector 2006-2013: A CO2 mitigation assessment based on a vintage structure	China; CO2 mitigation; Early retirement(ER); Power sector; Vintage structure	In the period 2006-2013, China's power sector adopted a policy which aimed to add large scale units (larger than 600 MW) and decommission small, old (but still technically functioning) and inefficient power plants in order to accelerate energy saving and mitigate emissions. The early-retirement (ER) of nearly 90 GW of capacity and massive new coal power installation in this period significantly a…	Economics of Energy and Environmental Policy
415	2016	Löfstedt Gilljam J., Leonel J., Cousins I.T., Benskin J.P.	Is Ongoing Sulfluramid Use in South America a Significant Source of Perfluorooctanesulfonate (PFOS)? Production Inventories, Environmental Fate, and Local Occurrence		Despite international phase-out initiatives, production and use of perfluorooctanesulfonate (PFOS) and related substances continues in some countries. In Brazil, the PFOS-precursor N-ethyl perfluorooctane sulfonamide (EtFOSA) is used in Sulfluramid, a pesticide for controlling leaf-cutting ants. New data on production, environmental fate, and occurrence of Brazilian Sulfluramid are reported herei…	Environmental Science and Technology
416	2016	Laleman R., Albrecht J.	Nuclear and old fossil phase out scenarios: Assessment of shortages, surpluses and the load factor of flexible assets with high renewable generation targets - A Belgian case study	Belgium; Electricity market; Renewable energy; Shortage; Surplus	In the coming decades Belgium will phase-out nuclear and old fossil capacity while (intermittent) renewable generation is expected to increase. We evaluate the occurrence of electricity shortages and surpluses in Belgium in 2013 and 2017, as well as the evolution of the load factors of flexible assets. Our statistical model for 2017 suggests surpluses of >2000 MW during 4% of the time. More alarm…	International Journal of Electrical Power and Energy Systems
417	2016	Parkinson S.C., Djilali N., Krey V., Fricko O., Johnson N., Khan Z., Sedraoui K., Almasoud A.H.	Impacts of Groundwater Constraints on Saudi Arabia's Low-Carbon Electricity Supply Strategy		Balancing groundwater depletion, socioeconomic development and food security in Saudi Arabia will require policy that promotes expansion of unconventional freshwater supply options, such as wastewater recycling and desalination. As these processes consume more electricity than conventional freshwater supply technologies, Saudi Arabia's electricity system is vulnerable to groundwater conservation …	Environmental Science and Technology
418	2016	Kannan R., Turton H.	Long term climate change mitigation goals under the nuclear phase out policy: The Swiss energy system transition	Energy system analysis; Energy systems model; Low carbon scenarios; Nuclear phaseout	The Swiss electricity system is dominated by low-carbon hydro and nuclear generation. The Government's decision to phase-out nuclear energy exacerbates Switzerland's climate change mitigation goals. Response to this challenge requires systemic changes to the energy system, which is generally a long-term, uncertain and systemic process, affected by technology choices across the entire energy syste…	Energy Economics
419	2016	Edberg K., Tarasova E.	Phasing out or phasing in: Framing the role of nuclear power in the Swedish energy transition	Energy transitions; Nuclear energy policy; Political ideologies; Sustainable development; Sweden	This article examines how members of the Swedish Parliament framed nuclear energy in the 2010 debate on the future of nuclear power in Sweden in order to understand how politicians construct and contextualize their views on the role of nuclear energy in energy transitions. Our findings suggest that four themes could be identified in the debate and that these were formative for politicians in fram…	Energy Research and Social Science
420	2016	Buchsbaum L.	Germany's Energiewende at a new turning point		Germany's Energiewende or energy transition was adopted as policy beginning in September 2010 and full legislative support was achieved in 2011, with key goals to help fight climate change, reduce energy imports, stimulate technology innovation and the green economy, reduce or eliminate the risks of nuclear power, provide energy security for the nation, strengthen local economies, and provide soc…	Power
421	2016	Mengel M., Levermann A., Frieler K., Robinson A., Marzeion B., Winkelmann R.	Future sea level rise constrained by observations and long-term commitment	Climate change; Climate impacts; Sea level rise	Sea level has been steadily rising over the past century, predominantly due to anthropogenic climate change. The rate of sea level rise will keep increasing with continued global warming, and, even if temperatures are stabilized through the phasing out of greenhouse gas emissions, sea level is still expected to rise for centuries. This will affect coastal areas worldwide???, and robust projection…	Proceedings of the National Academy of Sciences of the United States of America
422	2016	Armah F.A., Boamah S.A., Quansah R., Obiri S., Luginaah I.	Unsafe occupational health behaviors: Understanding mercury-related environmental health risks to artisanal gold miners in ghana	Environment; Ghana; Gold miners; Health; Knowledge; Perception; Risk	The relationships between environmental exposure and health outcomes are complex, multidirectional, and dynamic. Therefore, it is required to have an understanding of these linkages for effective health risk communication. Artisanal gold mining is widespread globally, in spite of its associated health hazards, with an estimated 30 million people engaged in it. In this study, the relationships bet…	Frontiers in Environmental Science
423	2016	Zhu J., Liu J.-G., Hu J.-X., Yi S.	Socio-economic analysis of the risk management of hexabromocyclododecane (HBCD) in China in the context of the Stockholm Convention	China; Hexabromocyclododecane; Risk management of chemicals; Socio-economic analysis; Stockholm convention	Socio-economic analysis (SEA) plays an important role in decision-making on risk management actions for certain chemicals under Multilateral Environmental Agreements (MEAs) in developing countries. This paper showed the first holistic and quantitative SEA case study on that by developing a country-specific SEA framwork and methodologies and applying the case of HBCD phase-out in China under the S…	Chemosphere
424	2016	Adhikari R., Bristow K.L., Casey P.S., Freischmidt G., Hornbuckle J.W., Adhikari B.	Preformed and sprayable polymeric mulch film to improve agricultural water use efficiency	Bioplastic; Crop yield; Moisture loss; Permeability; Polymer; Water vapour transmission	Plastic mulch films are widely used in agriculture to enhance crop production by suppressing weeds, conserving soil water and increasing soil temperature. The majority of plastic mulch films are however not biodegradable and are typically removed after each growing season. Recovery of these plastics from the soil is difficult and can affect successive crop yields while causing substantive cost to…	Agricultural Water Management
425	2016	Holmquist H., Schellenberger S., van der Veen I., Peters G.M., Leonards P.E.G., Cousins I.T.	Properties, performance and associated hazards of state-of-the-art durable water repellent (DWR) chemistry for textile finishing	Dendrimers; Hazard assessment; Per- and polyfluoroalkyl substances; PFAS; Silicones; Wax	Following the phase-out of long-chain per- and polyfluoroalkyl substances (PFASs), the textile industry had to find alternatives for side-chain fluorinated polymer based durable water repellent (DWR) chemistries that incorporated long perfluoroalkyl side chains. This phase-out and subsequent substitution with alternatives has resulted in a market where both fluorinated and non-fluorinated DWRs ar…	Environment International
426	2016	Yi S., Liu J.-G., Jin J., Zhu J.	Assessment of the occupational and environmental risks of hexabromocyclododecane (HBCD) in China	Environmental risk; Exposure simulation; Hexabromocyclododecane (HBCD); HPLC-MS/MS; Occupational risk	In 2013, hexabromocyclododecane (HBCD) was listed in the Stockholm Convention on Persistent Organic Pollutants obligated to be phased out worldwide. China is a major producer and user of HBCD. Based on Chinese HBCD production and processing conditions, we classified the existing 599 HBCD production and processing plants into six occupational exposure scenarios. We also used occupational environme…	Chemosphere
427	2016	Li Z., Bie P., Wang Z., Zhang Z., Jiang H., Xu W., Zhang J., Hu J.	Estimated HCFC-22 emissions for 1990-2050 in China and the increasing contribution to global emissions	Bottom-up; China; Emission inventory; HCFC-22; Projection	Chlorodifluoromethane (CHClF2, HCFC-22) is a widely used refrigerant and foaming agent that is not only an ozone-depleting substance (ozone depletion potential (ODP), 0.04) but also a greenhouse gas (global warming potential (GWP), 1780). A comprehensive historical emission inventory for 1990-2014 was produced using a bottom-up method, and a projection through to 2050 was made for China. The resu…	Atmospheric Environment
428	2016	Seher H., Navarro M., Artmann A., Larue J., Roloff R., Weiß D.	Modelling contaminant transport in generic landfills for decommissioning waste from German nuclear power plants	Contaminant transport; Landfill; NPP decommissioning; VLLW; Waste	The German decision to phase out nuclear power will increase the quantity of very low level waste (VLLW) from nuclear power plant (NPP) decommissioning in the near future, which will cause a capacity shortage of landfills. As a likely consequence, landfills will have to be constructed that are exclusively built for decommissioning waste without addition of municipal waste, and assessments for suc…	Progress in Nuclear Energy
429	2016	Barker T., Alexandri E., Mercure J.-F., Ogawa Y., Pollitt H.	GDP and employment effects of policies to close the 2020 emissions gap	abatement strategies; climate change mitigation; CO2 reductions; economic assessment; emissions scenarios; employment	Four policies might close the gap between the global GHG emissions expected for 2020 on the basis of current (2013) policies and the reduced emissions that will be needed if the long-term global temperature increase can be kept below the 2 °C internationally agreed limit. The four policies are (1) specific energy efficiency measures, (2) closure of the least-efficient coal-fired power plants, (3)…	Climate Policy
430	2016	Lokesh G.B., Patil S.S., Amaresh Y.S.	Socio-economic assessment of bio-pesticides application in agriculture	Agriculture; Bio-pesticides; Impact; Marketing; Productivity; Trend	Assessment of bio pesticides market show that the demand for bio pesticides has steadily increasing since 1997 and the momentum is projected to continue. Demand for bio-pesticides in India is forecast to exhibit high growth in terms of both volume and value, estimated at respective compounded annual rates of 18.3 percent and 19 percent over the 2014-2020 period. The trends in bio-pesticide use pa…	Ecology, Environment and Conservation
431	2016	Bravo A.G., Loizeau J.-L., Dranguet P., Makri S., Björn E., Ungureanu V.G., Slaveykova V.I., Cosio C.	Persistent Hg contamination and occurrence of Hg-methylating transcript (hgcA) downstream of a chlor-alkali plant in the Olt River (Romania)	Bacterial activity; Biota; Dispersion; Methylmercury; Reservoir; Sediments; Water	Chlor-alkali plants using mercury (Hg) cell technology are acute point sources of Hg pollution in the aquatic environment. While there have been recent efforts to reduce the use of Hg cells, some of the emitted Hg can be transformed to neurotoxic methylmercury (MeHg). Here, we aimed (i) to study the dispersion of Hg in four reservoirs located downstream of a chlor-alkali plant along the Olt River…	Environmental Science and Pollution Research
432	2016	Pattupara R., Kannan R.	Alternative low-carbon electricity pathways in Switzerland and it's neighbouring countries under a nuclear phase-out scenario	Decarbonisation of power sector; Electricity model; Nuclear phase-out; Switzerland; TIMES model	Switzerland and Europe are currently at a crossroads with respect to its electricity policy. Several existing nuclear and fossil fuel power plants are to be retired in the coming years. Meanwhile, ambitious carbon dioxide (CO2) emission reductions are envisaged, which could penalise fossil power plants and encourage investments in renewable-based electricity generation. Switzerland and a few othe…	Applied Energy
433	2016	Solomon S., Ivy D.J., Kinnison D., Mills M.J., Neely R.R., III, Schmidt A.	Emergence of healing in the Antarctic ozone layer		Industrial chlorofluorocarbons that cause ozone depletion have been phased out under the Montreal Protocol. A chemically driven increase in polar ozone (or "healing") is expected in response to this historic agreement. Observations and model calculations together indicate that healing of the Antarctic ozone layer has now begun to occur during the month of September. Fingerprints of September heal…	Science
434	2016	Joas F., Pahle M., Flachsland C., Joas A.	Which goals are driving the Energiewende? Making sense of the German Energy Transformation	Co-benefits; Energiewende; German energy transition; Goals and objectives of energy policy	In 2010, Germany agreed a plan to increase the share of renewables in power consumption to 80% by 2050, and in 2011 the decision was taken to phase-out nuclear power by 2022. This policy is now widely known as the "Energiewende". While many global observers consider this program to be primarily driven by the need to tackle climate change, the precise political goals of the Energiewende are, by an…	Energy Policy
435	2016	Hwang H.-M., Fiala M.J., Park D., Wade T.L.	Review of pollutants in urban road dust and stormwater runoff: part 1. Heavy metals released from vehicles	heavy metals; regulations; stormwater runoff; Urban road dust; vehicle traffic	Urban road dust can be highly enriched with trace metals such as copper, lead, zinc, and platinum group elements (PGEs) that are released primarily from vehicles. Concentrations of these metals are up to about 100 times higher than background levels. Lead concentrations in sediment core have declined dramatically due to phase out of leaded gasoline. Recent ban on the use of lead wheel balancing w…	International Journal of Urban Sciences
436	2016	Oberthür S.	Reflections on Global Climate Politics Post Paris: Power, Interests and Polycentricity	Climate change; climate governance; climate policy; geopolitics; Paris Agreement; United Nations Framework Convention on Climate Change	The Paris Agreement on climate change adopted in December 2015 has the potential to shape future climate politics and governance significantly, with broader implications for world politics at large. First of all, it solidifies the importance of ‘low-emission capacity’ as a source of power in international climate politics. Second, it supports the ongoing societal mobilisation and reinforces inter…	International Spectator
437	2016	Laleman R., Albrecht J.	Belgian blackout? Estimations of the reserve margin during the nuclear phase-out	Belgium; Electricity markets; Nuclear phase out; Reserve margin; Shortage	The outlook of the Belgian electricity system is increasingly unpredictable and challenging. Belgium is confronted with a nuclear phase out in a liberalized European electricity market which is strongly impacted by climate and renewable energy policies. The investment climate for controllable, non-intermittent assets is very problematic. We present estimates of the evolution of the reserve margin…	International Journal of Electrical Power and Energy Systems
438	2016	Basant S., Balram A.	Review on composition, emission sources of RSPM, TSPM, heavy metals and ions with effect on environment and health	Ions; Metals; Rspm; Secondary air pollutant; Sources; Tspm	Particulate pollution in urban atmosphere has become a matter of concentration nowadays. There are number of research works related to Respirable suspended Paticulate Matter (RSPM) and Total suspended Paticulate Matter (TSPM) in several cities like Delhi, Kolkata, Raniganj- Asansol, Dhanbad- Jharia, Lucknow, Mumbai, Chennai, Visakhapatnam etc. in our nation as well as in international places like…	Research Journal of Chemistry and Environment
439	2016	Chaturvedi V., Sharma M.	Modelling long-term HFC emissions from India's residential air-conditioning sector: exploring implications of alternative refrigerants, best practices, and a sustainable lifestyle within an integrated assessment modelling framework	climate change policies; climate scenarios; energy efficiency; energy models; GHG reductions; India	India's growing role in the global climate debate makes it imperative to analyse emission reduction policies and strategies across a range of GHGs, especially for under-researched non-CO2 gases. Hydrofluorocarbons' (HFCs) usage in cooling equipment and subsequent emissions are expected to increase dramatically in India with the phase-out of hydrochlorofluorocarbons (HCFCs) as coolants in air-cond…	Climate Policy
440	2016	Bos K., Gupta J.	Inclusive development, oil extraction and climate change: a multilevel analysis of Kenya	Climate change; emission trading; inclusive development; oil extraction; Principle of common but differentiated responsibilities; Right to Development; stranded assets; stranded resources	There has been considerable research on North–South issues on climate change; however, little work has been done on how the recent discovery of oil in some developing countries could affect North–South relations, the prospects for development for the South, climate change and local socio-environmental issues. Using the theory of inclusive development, the concept of the Right to Development, and …	International Journal of Sustainable Development and World Ecology
441	2016	Naims H.	Economics of carbon dioxide capture and utilization—a supply and demand perspective	Carbon capture and utilization; Circular economy; Commodity CO2; Costs of CO2 capture; Supply and demand scenarios	Lately, the technical research on carbon dioxide capture and utilization (CCU) has achieved important breakthroughs. While single CO2-based innovations are entering the markets, the possible economic effects of a large-scale CO2 utilization still remain unclear to policy makers and the public. Hence, this paper reviews the literature on CCU and provides insights on the motivations and potential o…	Environmental Science and Pollution Research
442	2016	Volkart K., Bauer C., Burgherr P., Hirschberg S., Schenler W., Spada M.	Interdisciplinary assessment of renewable, nuclear and fossil power generation with and without carbon capture and storage in view of the new Swiss energy policy	Carbon capture and storage; Life cycle assessment; Multi-criteria decision analysis; Power generation; Sustainability assessment; Switzerland	Swiss electricity generation is based on hydro and nuclear power, but current energy policy includes the nuclear phase-out by about 2035. This may lead to higher CO2 emissions of the Swiss power supply due to domestic fossil power generation or electricity imports. For compliance with the Swiss CO2 law, low carbon technologies such as renewable energies and Carbon Capture and Storage (CCS) gain i…	International Journal of Greenhouse Gas Control
443	2016	Le Faucheur S., Vasiliu D., Catianis I., Zazu M., Dranguet P., Beauvais-Flück R., Loizeau J.-L., Cosio C., Ungureanu C., Ungureanu V.G., Slaveykova V.I.	Environmental quality assessment of reservoirs impacted by Hg from chlor-alkali technologies: case study of a recovery	Chlor-alkali plant; Legacy pollution; Mercury; Reservoirs; Risk assessment	Mercury (Hg) pollution legacy of chlor-alkali plants will be an important issue in the next decades with the planned phase out of Hg-based electrodes by 2025 within the Minamata convention. In such a context, the present study aimed to examine the extent of Hg contamination in the reservoirs surrounding the Oltchim plant and to evaluate the possible improvement of the environmental quality since …	Environmental Science and Pollution Research
444	2016	Gilbertson L.M., Ng C.A.	Evaluating the use of alternatives assessment to compare bulk organic chemical and nanomaterial alternatives to brominated flame retardants	Alternatives assessment; Carbon nanotubes; Design for the environment; Engineered nanomaterials; Flame retardant; Montmorillonite; Nanoclay	Alternatives assessment (AA) provides a framework for selection of safer substitutes for problematic chemicals. This study assesses alternatives for flame retardants (FR) in electrical and electronic equipment (EEE), including two common brominated FR, decabromodiphenyl ether (deca-BDE) and tetrabromobisphenol A (TBBPA). Although deca-BDE is restricted in the EU and undergoing phase-out in the US…	ACS Sustainable Chemistry and Engineering
445	2016	Fischer W., Hake J.-F., Kuckshinrichs W., Schröder T., Venghaus S.	German energy policy and the way to sustainability: Five controversial issues in the debate on the “Energiewende”	Employment; Energiewende; Poverty; Prices; Security; Social change	German governments throughout the last 25 years have accepted the sustainability paradigm und put forth an energy policy that supports the development of renewable energies, the reduction of greenhouse gas emissions and the improvement of energy efficiency. Together with the process of seeking to phase out nuclear power, these objectives constitute the ‘Energiewende’ (energy transition) the Energ…	Energy
446	2016	Kuramochi T., Asuka J., Fekete H., Tamura K., Höhne N.	Comparative assessment of Japan's long-term carbon budget under different effort-sharing principles	carbon budget; effort sharing; equity; Japan; mitigation policy; mitigation scenarios	This article assesses Japan's carbon budgets up to 2100 in the global efforts to achieve the 2 °C target under different effort-sharing approaches based on long-term GHG mitigation scenarios published in 13 studies. The article also presents exemplary emission trajectories for Japan to stay within the calculated budget. The literature data allow for an in-depth analysis of four effort-sharing cat…	Climate Policy
447	2016	Renn O., Marshall J.P.	Coal, nuclear and renewable energy policies in Germany: From the 1950s to the “Energiewende”	Energiewende; German energy policy; German energy transformation; History of German energy supply; Public pressure on energy policies; Share of renewables	Over the last 50 years, German energy policy has ranged from strong enthusiasm for both coal and nuclear energy to deep skepticism. The most dramatic changes with respect to energy policies have occurred as a response to nuclear accidents, yet the accidental and unintended effects of coal policies are also important in influencing the trajectory. The newly emerging climate debate prevented the co…	Energy Policy
448	2016	Anderson A.G., Grose J., Pahl S., Thompson R.C., Wyles K.J.	Microplastics in personal care products: Exploring perceptions of environmentalists, beauticians and students	Debris; Microparticles; Microplastic; Personal care products; Public attitudes	Microplastics enter the environment as a result of larger plastic items breaking down (‘secondary’) and from particles originally manufactured at that size (‘primary’). Personal care products are an important contributor of secondary microplastics (typically referred to as ‘Microbeads’), for example in toothpaste, facial scrubs and soaps. Consumers play an important role in influencing the demand…	Marine Pollution Bulletin
449	2016	Matheou C.	Windy business		Engineers are exploring new ways for wind energy to replace the use of fossil fuels after 187 governments signed the Paris Agreement to fight climate change. Governments have signed the Paris Agreement in December 2015 to phase out the use of fossil fuels to cut greenhouse gas emissions. Wind energy is one of the most promising candidates to fill the gap. Engineers first have to make wind energy …	Engineering and Technology
450	2016	Naims H.	Economics of carbon dioxide capture and utilization—a supply and demand perspective	Carbon capture and utilization; Circular economy; Commodity CO2; Costs of CO2 capture; Supply and demand scenarios	Lately, the technical research on carbon dioxide capture and utilization (CCU) has achieved important breakthroughs. While single CO2-based innovations are entering the markets, the possible economic effects of a large-scale CO2 utilization still remain unclear to policy makers and the public. Hence, this paper reviews the literature on CCU and provides insights on the motivations and potential o…	Environmental Science and Pollution Research
451	2017	Paschke M.	Legal challenges of the new energy policy in Germany	Climate protection; Energiewende; Energy consumption; European law; Green electricity; Legislative basis; National constitutional law; Nuclear phase out	German Energiewende has substantially changed the electricity mix in Germany. Green electricity from wind, solar, water and biomass now provides the largest contribution to the total electricity consumption. In this respect, Energiewende can be regarded as an overall success. But in parallel to this scenario, a critical discourse has evolved concerning socio-political, economic and legal issues. …	Journal of Mining Institute
452	2017	Hartcher K.M., Jones B.	The welfare of layer hens in cage and cage-free housing systems	cage-free; cages; free-range; housing system; layer hen; legislation; welfare; welfare standards	Historically, animal welfare has been defined by the absence of negative states such as disease, hunger and thirst. However, a shift in animal welfare science has led to the understanding that good animal welfare cannot be achieved without the experience of positive states. Unequivocally, the housing environment has significant impacts on animal welfare. This review summarises how cage and cage-f…	World's Poultry Science Journal
453	2017	Jou J.H., Yu H.H., Tung F.C., Chiang C.H., He Z.K., Wei M.K.	A replacement for incandescent bulbs: high-efficiency blue-hazard free organic light-emitting diodes		A blue-hazard free, healthy light source will become the mainstream of future lighting, wherein higher energy saving is always a must. Although the use of incandescent bulbs is the most friendly electricity-driven lighting measure from the perspectives of the human eye, melatonin generation, artifacts, ecosystems, the environment, and night skies due to their intrinsically low blue emission, they…	Journal of Materials Chemistry C
454	2017	Hoffman K., Sosa J.A., Stapleton H.M.	Do flame retardant chemicals increase the risk for thyroid dysregulation and cancer?	Flame retardant chemicals; thyroid cancer; thyroid regulation	Purpose of review Flame retardant chemicals are added to consumer products to reduce fire incidence and severity; approximately 1.5 million tons of these chemicals are used annually. However, their widespread use has led to their ubiquitous presence in the environment and chronic accumulation in human tissues. We summarize current trends in human flame retardant chemical exposure, and review rece…	Current Opinion in Oncology
455	2017	Bergstrand K.-J.I.	Methods for growth regulation of greenhouse produced ornamental pot- and bedding plants - A current review	artificial lighting; fertigation; gibberellic acid; ornamental plants; plant breeding	Chemical plant growth regulators (PGRs) are used in the production of ornamental potted and bedding plants. Growth control is needed for maximizing production per unit area, reducing transportation costs and to obtain a desired visual quality. However, the use of PGRs is associated with toxicity risks to humans and the environment. In many countries the availability of PGRs is restricted as few s…	Folia Horticulturae
456	2017	Previdi M., Polvani L.M.	Impact of the Montreal Protocol on Antarctic surface mass balance and implications for global sea level rise	Antarctica; Atmosphere; Climate models; Radiative forcing; Snowfall	The Montreal Protocol on Substances that Deplete the Ozone Layer, adopted in 1987, is an international treaty designed to protect the ozone layer by phasing out emissions of chlorofluorocarbons and other ozonedepleting substances (ODSs). A growing body of scientific evidence now suggests that the implementation of the Montreal Protocol will have significant effects on climate over the next severa…	Journal of Climate
457	2017	Michopoulos A., Ziogou I., Kerimis M., Zachariadis T.	A study on hot-water production of hotels in Cyprus: Energy and environmental considerations	Carbon dioxide (CO2) emissions; Carbon dioxide emissions mitigation strategies; Cyprus; Hot-water production; Hotel primary energy consumption; Primary energy mitigation strategies; Tourism	Hotel units are responsible for a significant proportion of energy consumption and carbon dioxide emissions in the tourist sector. This paper focuses on the energy and environmental performance of hot-water production systems utilized by high class hotels in Cyprus in order to formulate appropriate carbon emission mitigation strategies. The main systems used are boilers fired by Liquefied Petrole…	Energy and Buildings
458	2017	Sonawat A., Choi Y.-S., Lee K.-Y., Yang H.-M., Kim J.-H.	Feasibility analysis of existing compressor design for different refrigerants	Centrifugal compressor; Computational fluid dynamics; Global warming; Refrigerant; Turbo chiller	The destruction of ozone layer due to the use of refrigerants is a matter of concern in the present world. This has been addressed through various platforms and several guidelines have been framed for their usage to prevent its further degradation. Since the existing chlorofluorocarbon (CFC) and hydrofluorocarbon (HCFC) refrigerants are at the verge of phasing out because of their higher environm…	International Journal of Fluid Machinery and Systems
459	2017	Bretschger L., Zhang L.	Nuclear phase-out under stringent climate policies: A dynamic macroeconomic analysis	CGE model; Decarbonization; Energy and growth; Induced innovation; Nuclear phase out	In this paper we investigate the long-run economic consequences of phasing out nuclear energy in the presence of stringent climate policies. We integrate endogenous growth theory and technology-based activity analysis into a dynamic numerical general equilibrium model. Both market-based and policy-mandated nuclear phase-out are studied. Using data from the Swiss economy we find that the aggregate…	Energy Journal
460	2017	Ferreira F., Avelino C., Bentes I., Matos C., Teixeira C.A.	Assessment strategies for municipal selective waste collection schemes	Collection schemes; Performance indicators; Performance índex; Selective collection; Solid waste collection; Waste management	An important strategy to promote a strong sustainable growth relies on an efficient municipal waste management, and phasing out waste landfilling through waste prevention and recycling emerges as a major target. For this purpose, effective collection schemes are required, in particular those regarding selective waste collection, pursuing a more efficient and high quality recycling of reusable mat…	Waste Management
461	2017	Sangiuliano S.J.	Planning for tidal current turbine technology: A case study of the Gulf of St. Lawrence	Electricity; Planning; Renewable energy; Tidal current turbines	The combustion of fossil fuels for purposes of energy production has accelerated the rate at which the planet is warming, thereby causing adverse effects on natural ecosystems across the globe. The consequences of climate change arising from the use of conventional fuels such as coal, oil, and gas demands a shift towards the use of sustainable, emissions-free renewable energy technologies. When p…	Renewable and Sustainable Energy Reviews
462	2017	Xunzhang P., Wenying C., Clarke L.E., Lining W., Guannan L.	China's energy system transformation towards the 2 °C goal: Implications of different effort-sharing principles	Carbon budgets; China; Effort-sharing; Energy system transformation; INDC	In coping with climate change, China's CO2 mitigation targets should keep in step with the achievement of the long-term goal of holding temperature increase to well below 2 °C above pre-industrial levels by the end of this century (this is referred to as the 2 °C goal). Many previous papers have highlighted the implications of different effort-sharing principles and schemes in determining nationa…	Energy Policy
463	2017	Lund P.D.	Implications of Finland's plan to ban coal and cutting oil use	Bioenergy; Climate change mitigation; Coal; Energy policy; Nuclear; Oil	Finland has decided to phase out coal and cut oil use by a quarter by 2030. Relying on nuclear power and bioenergy mainly, the Finnish case suggests that traditional energy solutions may also provide a path towards carbon neutrality. Energy and climate policies should, however, properly address the long-term risks of these solutions.	Energy Policy
464	2017	Jordaan S.M., Romo-Rabago E., McLeary R., Reidy L., Nazari J., Herremans I.M.	(Sent Ali) The role of energy technology innovation in reducing greenhouse gas emissions: A case study of Canada	Climate policy; Energy innovation; Greenhouse gas emissions; International commitments	Understanding the influence of energy technology innovation in reducing a country's greenhouse gas emissions requires a systematic review to characterize the existing system. A comprehensive data review of available financing mechanisms and investments by government and industry is undertaken for the case of Canada, coupled with an organized examination of existing international, federal, and reg…	Renewable and Sustainable Energy Reviews
465	2017	Miller L., Carriveau R.	Balancing the carbon and water footprints of the Ontario energy mix	Carbon footprint; Clean energy; Energy demand; Ontario's energy supply; Water footprint; Water scarcity	With climate change being the current most pressing environmental issue, clean energy projects are emerging with a focus on reducing our carbon footprint while meeting our energy demands. There are several intersecting challenges surrounding climate change, energy demand, and water scarcity. The movement towards a less carbon-intensive energy supply could result in an increase or decrease in wate…	Energy
466	2017	Gralla F., Abson D.J., Møller A.P., Lang D.J., von Wehrden H.	(Sent Achmed) Energy transitions and national development indicators: A global review of nuclear energy production	Countries; Energy transitions; Nuclear energy; Sustainability; World development indicators	Energy use plays a vital role for human well-being. However, human well-being can also be affected by socio-economic and environmental impacts associated with the use of different primary energy sources. Nuclear energy production is perceived as one means of satisfying national energy demand while contributing to a potentially sustainable energy transition. The objective of this study is to furth…	Renewable and Sustainable Energy Reviews
467	2017	Graziosi F., Arduini J., Furlani F., Giostra U., Cristofanelli P., Fang X., Hermanssen O., Lunder C., Maenhout G., O'Doherty S., Reimann S., Schmidbauer N., Vollmer M.K., Young D., Maione M.	European emissions of the powerful greenhouse gases hydrofluorocarbons inferred from atmospheric measurements and their comparison with annual national reports to UNFCCC	Atmospheric measurements; Emission verifications; F-gases; Inverse modelling; Kyoto Protocol; Montreal Protocol	Hydrofluorocarbons are powerful greenhouse gases developed by industry after the phase-out of the ozone depleting chlorofluorocarbons and hydrochlorofluorocarbons required by the Montreal Protocol. The climate benefit of reducing the emissions of hydrofluorocarbons has been widely recognised, leading to an amendment of the Montreal Protocol (Kigali Amendment) calling for developed countries to st…	Atmospheric Environment
468	2017	Volkart K., Weidmann N., Bauer C., Hirschberg S.	Multi-criteria decision analysis of energy system transformation pathways: A case study for Switzerland	Energy policy making; Life cycle assessment; Multi criteria decision analysis; Scenario modelling; Sustainability assessment; Trade-off analysis	Two recent political decisions are expected to frame the development of the Swiss energy system in the coming decades: the nuclear phase-out and the greenhouse gas (GHG) emission reduction target. To accomplish both of them, low-carbon technologies based on renewable energy and Carbon Capture and Storage (CCS) are expected to gain importance. The objective of the present work is to support prospe…	Energy Policy
469	2017	Bryngelsson D., Hedenus F., Johansson D.J.A., Azar C., Wirsenius S.	How Do Dietary Choices Influence the Energy-System Cost of Stabilizing the Climate?	Climate change mitigation; Dietary changes; Energy system modelling	We investigate how different global dietary scenarios affect the constraints on, and costs of, transforming the energy system to reach a global temperature stabilization limit of 2◦C above the pre-industrial level. A global food and agriculture model, World Food Supply Model (WOFSUM), is used to create three dietary scenarios and to calculate the CH4 and N2O emissions resulting from their respect…	Energies
470	2017	Krämer L.	Spain and Coal, the Environment and eu Law	Coal; combustion plants; greenhouse gas emissions-electricity production; subsidies-state aid	Mining of indigenous Spanish coal has been heavily subsidized ever since 1986, and recently, the European Commission authorized a further amount of State aid of 2.3 billion in order to facilitate the closure of uncompetitive coal mines in Spain by 2018. These subsidies are paid regardless of the facts that: The indigenous coal is of minor quality and not needed to ensure safe energy supply in Spa…	Journal for European Environmental and Planning Law
471	2017	Matsuo T., Schmidt T.S.	Hybridizing low-carbon technology deployment policy and fossil fuel subsidy reform: A climate finance perspective	climate policy; mitigation; renewable energy; subsidies	The environmental argument behind fossil fuel subsidy reform is strong, particularly among international finance institutions wishing to support transformational low-carbon development. However, supporting reform in practice has often met methodological and political barriers. Instead, a large share of international climate finance has flowed to national policies and measures that incentivize the…	Environmental Research Letters
472	2017	Dujardin J., Kahl A., Kruyt B., Bartlett S., Lehning M.	Interplay between photovoltaic, wind energy and storage hydropower in a fully renewable Switzerland	Balancing; Hydropower; Intermittency; Photovoltaic; Renewable energy; Wind	As part of its ambitious long term energy strategy, Switzerland plans to phase out nuclear power production and replace most or all of its significant share of national electricity production (40%) by renewables, in particular by photovoltaics (PV) and wind energy. The existing large fraction of hydropower and significant pumped-storage hydro capacity in the mountainous regions of the country wil…	Energy
473	2017	Verbruggen A., Yurchenko Y.	Positioning nuclear power in the low-carbon electricity transition	Electricity sector; IAEA International Atomic Energy Agency; IPCC Intergovernmental Panel on Climate Change; Low-carbon transition; Nuclear power; Nuclear risks; Renewable energy; Sustainability	Addressing climate change requires de-carbonizing future energy supplies in an increasingly energy-dependent world. The IEA and the IPCC (2014) mention the following as low-carbon energy supply options: 'renewable energy, nuclear power and fossil fuels with carbon capture and storage'. Positioning nuclear power in the decarbonization transition is a problematic issue and is overridden by ill-conc…	Sustainability (Switzerland)
474	2017	Kienast F., Huber N., Hergert R., Bolliger J., Moran L.S., Hersperger A.M.	Conflicts between decentralized renewable electricity production and landscape services – A spatially-explicit quantitative assessment for Switzerland	GIS; Land-use conflict; Landscape service mapping; Switzerland	The production of decentralized renewable electricity often collides with provisioning, regulating and cultural services of the landscape. In this paper we operationalize the landscape service approach and generate conflict maps between three renewable energies (wind; PV; forest biomass) and six competing landscape services (nutrition and materials; aesthetics; physical and experiential interacti…	Renewable and Sustainable Energy Reviews
475	2017	Ebenhard T., Forsberg M., Lind T., Nilsson D., Andersson R., Emanuelsson U., Eriksson L., Hultåker O., Iwarsson Wide M., Ståhl G.	Environmental effects of brushwood harvesting for bioenergy	Bioenergy; Biological diversity; Brushwood harvesting; Climate; Sustainability	Sweden aims to increase the proportion of renewable energy sources, ultimately to be able to phase out fossil fuels. To achieve this, new energy sources need to be explored. In this multi-disciplinary article, we examine the technical, economical, ecological and legal possibilities to commercially and sustainably harvest brushwood for bioenergy, while simultaneously gaining positive environmental…	Forest Ecology and Management
476	2017	Cignitti S., Andreasen J.G., Haglind F., Woodley J.M., Abildskov J.	Integrated working fluid-thermodynamic cycle design of organic Rankine cycle power systems for waste heat recovery	CAMD; Integrated design; Optimization; Organic Rankine cycle; Waste heat; Working fluid	Today, some established working fluids are being phased out due to new international regulations on the use of environmentally harmful substances. With an ever-increasing cost to resources, industry wants to converge on improved sustainability through resource recovery, and in particular waste heat recovery. In this paper, an organic Rankine cycle process and its pure working fluid are designed s…	Applied Energy
477	2017	Kretschmann J.	Sustainability-orientated post-mining in Germany	Hard coal mining; Mine closure; Mining heritage; Post-mining; Post-mining management; Rag; Sustainability	Mining has deeply influenced the social, economic and ecological development of many regions by changing the landscapes, cities and population structures. Beside of this mining has always created all kinds of cultural artefacts from jewelry to mineŕs songs, that can be called mining heritage. Especially, built heritage is one of the most identity-performing cultural artefacts of a modern society.…	Eurasian Mining
478	2017	Giraudo M., Dubé M., Lépine M., Gagnon P., Douville M., Houde M.	Multigenerational effects evaluation of the flame retardant tris(2-butoxyethyl) phosphate (TBOEP) using Daphnia magna	Aquatic invertebrate; Endocrine disruption; Enzyme activity; Gene transcription; Organophosphate ester; Transgenerational effects	Tris(2-butoxyethyl) phosphate (TBOEP) is an organophosphate ester used as substitute following the phase-out of brominated flamed retardants. Because of its high production volume and its use in a broad range of applications, this chemical is now frequently detected in the environment and biota. However, limited information is available on the long-term effects of TBOEP in aquatic organisms. In t…	Aquatic Toxicology
479	2017	Weldu Y.W., Assefa G.	The search for most cost-effective way of achieving environmental sustainability status in electricity generation: Environmental life cycle cost analysis of energy scenarios	Economic impact; Electricity; Integrated analysis; LCA; LCC; Sustainability	Over 80% of Alberta's electricity supply comes from fossil fuels; coal fired plants made up 43%. Alberta has announced its climate leadership plan, in which it is going to end electricity from coal and move towards sustainable power production. All categories of renewable energy sources, including bioenergy are expected to significantly contribute to the transition and transformation of Alberta's…	Journal of Cleaner Production
480	2017	Friedrich E., Wüstenhagen R.	Leading Organizations Through the Stages of Grief: The Development of Negative Emotions Over Environmental Change	corporate sustainability; decision-making; emotions; energy policy; nuclear energy; organizational change; stages of grief	This conceptual article theorizes about the effect of emotions of individual organizational leaders during a period of sustainability-related upheaval within an industry. To illustrate the effect of emotions, it proposes to draw on the model of five stages of grief by Elisabeth Kübler-Ross, a conceptual framework describing terminally ill patients’ responses to their impending death. The authors …	Business and Society
481	2017	Wu Y., Su G., Tang S., Liu W., Ma Z., Zheng X., Liu H., Yu H.	The combination of in silico and in vivo approaches for the investigation of disrupting effects of tris (2-chloroethyl) phosphate (TCEP) toward core receptors of zebrafish	Endocrine disrupting; Flame retardant; In silico; Nuclear receptors; Panoramic map; Signaling pathways	Tris (2-chloroethyl) phosphate (TCEP), a substitute for brominated flame retardants (FRs) that have been phased out of use, is frequently detected in aqueous environments. However, previous studies on its endocrine disrupting effects have mainly focused on terrestrial mammals. Here, to comprehensively evaluate the potential adverse effects of TCEP on aquatic vertebrates, zebrafish was used as a m…	Chemosphere
482	2017	Lacey F.G., Henze D.K., Lee C.J., Van Donkelaar A., Martin R.V.	Transient climate and ambient health impacts due to national solid fuel cookstove emissions	Aerosols; Atmospheric modeling; Climate; Cookstoves; Human health	Residential solid fuel use contributes to degraded indoor and ambient air quality and may affect global surface temperature. However, the potential for national-scale cookstove intervention programs to mitigate the latter issues is not yet well known, owing to the spatial heterogeneity of aerosol emissions and impacts, along with coemitted species. Here we use a combination of atmospheric modelin…	Proceedings of the National Academy of Sciences of the United States of America
483	2017	Pleßmann G., Blechinger P.	How to meet EU GHG emission reduction targets? A model based decarbonization pathway for Europe's electricity supply system until 2050	Decarbonization; GHG emission mitigation; Power system modeling; Renewable energies; Transition pathway	Globally, due to industrialization, GHG emissions continue to increase. This is despite the existing scientific and political consensus to fight human-induced climate change. To reverse this trend, viable, cost-effective decarbonization pathways are needed. We focus on the European power supply system and demonstrate the techno-economic feasibility of reaching the EU's mitigation targets by 2050.…	Energy Strategy Reviews
484	2017	Ohm T., Myung S., Jang W., Yu S.	A comparison of refrigerant management policies and suggestions for improvement in South Korea	CFCs (chlorofluorocarbons); Comparative policy analysis; Emissions trading; GHG (greenhouse gas); HCFCs (hydrochlorofluorocarbons); HFCs (hydrofluorocarbons); Refrigerant management	HFCs (hydrofluorocarbons) emerged as alternative refrigerants after the production of chlorofluorocarbons was banned and hydrochlorofluorocarbons were phased out, under the Montreal Protocol on Substances that Deplete the Ozone Layer. However, because the Kyoto Protocol considered HFCs as greenhouse gases, and their impact on climate change has been increasing, major developed countries have been…	Journal of Material Cycles and Waste Management
485	2017	Wang Z., Boucher J.M., Scheringer M., Cousins I.T., Hungerbühler K.	Toward a Comprehensive Global Emission Inventory of C 4-C 10 Perfluoroalkanesulfonic Acids (PFSAs) and Related Precursors: Focus on the Life Cycle of C 8-Based Products and Ongoing Industrial Transition		Here a new global emission inventory of C4-C10 perfluoroalkanesulfonic acids (PFSAs) from the life cycle of perfluorooctanesulfonyl fluoride (POSF)-based products in 1958-2030 is presented. In particular, we substantially improve and expand the previous frameworks by incorporating missing pieces (e.g., emissions to soil through land treatment, overlooked precursors) and updating parameters (e.g.,…	Environmental Science and Technology
486	2017	Carvalho F.P.	Pesticides, environment, and food safety	Agrochemicals; Environmental health; Food production; Pesticides; Residues	Agrochemicals have enabled to more than duplicate food production during the last century, and the current need to increase food production to feed a rapid growing human population maintains pressure on the intensive use of pesticides and fertilizers. However, worldwide surveys have documented the contamination and impact of agrochemical residues in soils, and terrestrial and aquatic ecosystems i…	Food and Energy Security
487	2017	Fathurrahman F., Kat B., Soytaṣ U.	Simulating Indonesian fuel subsidy reform: a social accounting matrix analysis	Economic modelling; Energy policy; Oil; Social accounting matrix; Subsidy; Sustainable development	The debate over phasing out fuel subsidies in Indonesia is quite intense. Recent studies pointed out an unfair distribution of subsidies. Besides this, the burden of fuel subsidies to Indonesian government is expected to increasingly continue in parallel with rising fuel consumption as well as international oil prices. However, recent experiences indicated that phasing out the fuel subsidy could …	Annals of Operations Research
488	2017	Aldy J.E.	Policy surveillance in the G-20 fossil fuel subsidies agreement: lessons for climate policy		Inadequate policy surveillance has undermined the effectiveness of multilateral climate agreements. To illustrate an alternative approach to transparency, I evaluate policy surveillance under the 2009 G-20 fossil fuel subsidies agreement. The Leaders of the Group of 20 nations tasked their energy and finance ministers to identify and phase-out fossil fuel subsidies. The G-20 leaders agreed to sub…	Climatic Change
489	2017	van Soest H.L., de Boer H.S., Roelfsema M., den Elzen M.G.J., Admiraal A., van Vuuren D.P., Hof A.F., van den Berg M., Harmsen M.J.H.M., Gernaat D.E.H.J., Forsell N.	Early action on Paris Agreement allows for more time to change energy systems		The IMAGE integrated assessment model was used to develop a set of scenarios to evaluate the Nationally Determined Contributions (NDCs) submitted by Parties under the Paris Agreement. The scenarios project emissions and energy system changes under (i) current policies, (ii) implementation of the NDCs, and (iii) various trajectories to a radiative forcing level of 2.8 W/m2 in 2100, which gives a p…	Climatic Change
490	2017	Hammond G.P., O'Grady Á.	The potential environmental consequences of shifts in UK energy policy that impact on electricity generation	bioenergy; carbon capture and storage; Electricity futures; fossil fuels; life-cycle assessment; policy shifts; sustainability	Internationally, there has been a move by nations to decarbonise their electricity systems in an effort to tackle rising territorial emissions. No consensus has been fully reached on best approach, which has led to significant divergence in energy policy between countries and a consequential lack of long-term clarity. Additionally, recent UK policy failures, in terms of stimulating greater energy…	Proceedings of the Institution of Mechanical Engineers, Part A: Journal of Power and Energy
491	2017	Grung M., Vikan H., Hertel-Aas T., Meland S., Thomas K.V., Ranneklev S.	Roads and motorized transport as major sources of priority substances? A data register study		A data register study was performed in order to identify the amounts of hazardous substances in products related to motorized transport in Norway during 2012. The hazardous substances were selected from legislative investigations performed by the European Chemicals Agency (ECHA), European Union (EU), and Norwegian Environment Agency (NEA). Information regarding hazardous substances in 52 selected…	Journal of Toxicology and Environmental Health - Part A: Current Issues
492	2017	Dien N.T., Hirai Y., Sakai S.-I.	In-use polybrominated diphenyl ether (PBDE) stocks and atmospheric emissions in Japan	In-use stock; PBDE atmospheric emission; PBDE survival rate; Polybrominated diphenyl ether (PBDE) in Japan; Population balance model	We estimated the in-use stocks of polybrominated diphenyl ethers (PBDEs) in Japan using a population balance model. The estimation is based on the domestic demand of PBDEs and the assumed survival rate of these products. Two cases relevant to the future regulation of commercial deca-BDE are considered, namely (1) deca-BDE declines at the same rate as the current rate of decline, and (2) deca-BDE …	Journal of Material Cycles and Waste Management
493	2017	Oshiro K., Kainuma M., Masui T.	Implications of Japan's 2030 target for long-term low emission pathways	Climate change mitigation; Integrated assessment model; Intended Nationally Determined Contribution; Low-carbon energy; Paris Agreement	This study assesses implications of the target reduction in GHG emissions by 2030 included in Japan's Intended Nationally Determined Contribution (INDC) for long-term low emission pathways toward 2050, as well as feasibility of the 2030 target itself using AIM/Enduse model. Scenario analysis by 2030 suggests that implementing the INDC could consolidate a transition from the baseline trajectory, w…	Energy Policy
494	2017	Rogge K.S., Johnstone P.	Exploring the role of phase-out policies for low-carbon energy transitions: The case of the German Energiewende	Creative destruction; Credibility; Discontinuation / destabilization policy; Energy transition; Nuclear power; Policy mix; Renewable energy	The energy sector plays a significant role in reaching the ambitious climate policy target of limiting the global temperature increase to well below 2 °C. To this end, technological change has to be redirected and accelerated in the direction of zero-carbon solutions. Given the urgency and magnitude of the climate change challenge it has been argued that this calls for a policy mix which simultan…	Energy Research and Social Science
495	2017	Erickson P., Down A., Lazarus M., Koplow D.	Effect of subsidies to fossil fuel companies on United States crude oil production		Countries in the G20 have committed to phase out 'inefficient' fossil fuel subsidies. However, there remains a limited understanding of how subsidy removal would affect fossil fuel investment returns and production, particularly for subsidies to producers. Here, we assess the impact of major federal and state subsidies on US crude oil producers. We find that, at recent oil prices of US$50 per bar…	Nature Energy
496	2017	Geels F.W., Sovacool B.K., Schwanen T., Sorrell S.	The Socio-Technical Dynamics of Low-Carbon Transitions	climate change; energy transitions; multi-level perspective; policy lessons; socio-technical approach	Effective mitigation of climate change will require far-reaching transformations of electricity, heat, agricultural, transport, and other systems. The energy studies and modeling research that so often dominate academic and policy debates provide valuable insights into these transitions, but remain constrained by their focus on rational decision-making and their neglect of non-linear dynamics and…	Joule
497	2017	Unnerstall T.	How expensive is an energy transition? A lesson from the German Energiewende		The Paris climate agreement of December 2015 is generally considered a breakthrough on the way to a sustainable future for mankind. In particular, the agreement calls for fundamental transitions in the energy systems worldwide, since more than 80% of CO2 emissions stem from the use of fossil fuels in the energy supply. Considering such energy transitions, in any country there will certainly be te…	Energy, Sustainability and Society
498	2017	Wu Q., Liu X., Liang C., Leung J.Y.S., Li H., Chen S., Mai B., Miao S., Chen Y., Wu Z., Chen Z.	Historical trends and ecological risks of polybrominated diphenyl ethers (PBDEs) and alternative halogenated flame retardants (AHFRs) in a mangrove in South China	Alternative halogenated flame retardant; Ecological risk; Mangrove; Pollution history; Polybrominated diphenyl ether	While the production of polybrominated diphenyl ethers (PBDEs) was gradually phased out in the last decade, they may still pose hidden danger to the environment due to their toxicity and persistence. On the other hand, alternative halogenated flame retardants (AHFRs) have been increasingly used as substitutes for PBDEs and may further worsen environmental health. To determine the environmental im…	Science of the Total Environment
499	2017	Lu, M., Cagnetta, G., Zhang, K., Huang, J., Yu, G	Mechanochemical mineralization of "very persistent" fluorocarbon surfactants -6:2 fluorotelomer sulfonate (6:2FTS) as an example		Fluorinated organic chemicals have a wide variety of industrial and consumer applications. For long time perfluorooctane sulfonate and perfluorooctanoic acid have been used as precursors for manufacture of such chemicals. However, these C8 chain compounds have been demonstrated to be toxic, persistent, and bioaccumulative, thus inducing their phase-out. Currently, C6 telomer based fluorocarbon su…	Scientific Reports
500	2017	Gareau B.J.	Sociology in global environmental governance? Neoliberalism, protectionism and the methyl bromide controversy in the Montreal protocol	Global environmental governance; Methyl bromide; Montreal Protocol; Neoliberalism; Protectionism; Science; Sociology; Strawberries	Sociological studies of global agriculture need to pay close attention to the protectionist aspects of neoliberalism at the global scale of environmental governance. With agri-food studies in the social sciences broadening interrogations of the impact of neoliberalism on agri-food systems and their alternatives, investigating global environmental governance (GEG) will help reveal its impacts on t…	Environments - MDPI
501	2017	Castello I., D’Emilio A., Raviv M., Vitale A.	Soil solarization as a sustainable solution to control tomato Pseudomonads infections in greenhouses	Greenhouse covering; Mulching film; Pseudomonads infections; Soil solarization; Tomato yield	The reduction or phase-out of soil fumigants according to European directives has led to a re-evaluation of sustainable heat-based techniques and exploiting solar energy, e.g., solarization that was used successfully for the eradication of fungi, weeds, and nematodes. Since the beginning of the current century, bacterial infections caused by phytopathogenic Pseudomonads have been increasingly rep…	Agronomy for Sustainable Development
502	2018	Filatov V.V., Zaitseva N.A., Larionova A.A., Zhenzhebir V.N., Polozhentseva I.V., Takhumova O.V., Kolosova G.M.	State management of plastic production based on the implementation of UN decisions on environmental protection	Articles made of plastic; Ecology; Environmental problem; Environmental protection; Government regulation of the United Nations; Municipal solid waste; Recycling	This article presents the results of the research on environmental the problems associated with the accumulation of polymer waste, the UN’s decision in these destinations, as well as measures of state regulation of the production and disposal of plastic products. European countries, in particular, England, France, Germany and Denmark, took the path of phasing out plastic, introducing limits and a…	Ekoloji
503	2018	Obersteiner M., Bednar J., Wagner F., Gasser T., Ciais P., Forsell N., Frank S., Havlik P., Valin H., Janssens I.A., Peñuelas J., Schmidt-Traub G.	How to spend a dwindling greenhouse gas budget		The Paris Agreement is based on emission scenarios that move from a sluggish phase-out of fossil fuels to large-scale late-century negative emissions. Alternative pathways of early deployment of negative emission technologies need to be considered to ensure that climate targets are reached safely and sustainably. © 2017 The Author(s).	Nature Climate Change
504	2018	Eriksson C.	Phasing out a polluting input in a growth model with directed technological change	Directed technological change; Energy substitution; Growth drag; Pollution	This paper explores the potential conflict between economic growth and the environment, and the optimal long-run environmental policy. It formulates a growth model with directed technological change and focuses on the case with low elasticity of substitution between clean and dirty inputs in production. New technology is substituted for the polluting input, which results in a gradual decline in p…	Economic Modelling
505	2018	Milios L., Davani A.E., Yu Y.	Sustainability impact assessment of increased plastic recycling and future pathways of plastic waste management in Sweden	Plastic recycling; Plastic waste; Recycling targets; Sustainability assessment	Plastic is a versatile material that has contributed to numerous product innovations and convenience in everyday life. However, plastic production is growing at an alarming rate, and so has the generation of plastic waste. Unsound waste management results in plastic leakage to the environment with multiple adverse effects to ecosystems. Incineration of plastic waste produces excessive greenhouse …	Recycling
506	2018	Buchsbaum L.	Europe's power generation industry evolves		The EU is unequivocally continuing down a path of global climate and energy leadership while bringing online more carbon-neutral fuel systems throughout its 28 member states, closing in on the 2020 goal of a 20% reduction in greenhouse gas emissions from 1990 levels. Official data from 2015 show that GHG emissions have already decreased beyond the 20% reduction target, and energy use from renewab…	Power
507	2018	Deutsch N., Fiáth A., Virág M., Berényi L.	Nuclear power - additions to wholesale electricity prices and margin of safety	Cvp analysis; Margin of safety; Nuclear power plants; Wholesale electricity prices	After the Fukushima Daichii Accident, nuclear phase-out policy (so-called '‘Energiewende’') of Germany and the increasing use of renewable energy sources for electricity generation led to new challenges in energy balancing and security of supply, and induced the reduction of wholesale electricity prices especially in Eastern-European Countries to the detriment of German households creating a fina…	WSEAS Transactions on Business and Economics
508	2018	Ciacci L., Vassura I., Passarini F.	Shedding light on the anthropogenic europium cycle in the EU-28. Marking product turnover and energy progress in the lighting sector	Cathode ray tubes; Energy efficiency; Fluorescent lamps; In-use stock; Light emitting diodes; REEs	Phase-out strategies for incandescent bulbs in favor of advanced energy-efficiency lighting systems such as fluorescent lamps and solid-state technology have considerably reduced the energy use for lighting, but have also resulted in dependence on many critical materials like rare earth elements and shifted the attention to sustainable use and recovery of resources. In this work, a dynamic materi…	Resources
509	2018	Babonneau F., Thalmann P., Vielle M.	Defining deep decarbonization pathways for Switzerland: an economic evaluation	Carbon capture and storage (CCS); climate policy; computable general equilibrium model; decarbonization; energy policy; Switzerland	This article simulates deep decarbonization pathways for a small open economy that lacks the usual avenues for large CO2 reductions–heavy industry and power generation. A computable general equilibrium model is used to assess the energy and economic impacts of the transition to only one ton of CO2 emissions per capita in 2050. This represents a 76% reduction with respect to 1990 levels, while the…	Climate Policy
510	2018	Land M., De Wit C.A., Bignert A., Cousins I.T., Herzke D., Johansson J.H., Martin J.W.	What is the effect of phasing out long-chain per- and polyfluoroalkyl substances on the concentrations of perfluoroalkyl acids and their precursors in the environment? A systematic review	Concentration; Emission; Environmental fate; Perfluoroalkane acids; PFOA; PFOS; Phase-out; Regulation; Source; Temporal trends	Background: There is a concern that continued emissions of man-made per- and polyfluoroalkyl substances (PFASs) may cause environmental and human health effects. Now widespread in human populations and in the environment, several PFASs are also present in remote regions of the world, but the environmental transport and fate of PFASs are not well understood. Phasing out the manufacture of some typ…	Environmental Evidence
511	2018	Vuppaladadiyam A.K., Yao J.G., Florin N., George A., Wang X., Labeeuw L., Jiang Y., Davis R.W., Abbas A., Ralph P., Fennell P.S., Zhao M.	Impact of Flue Gas Compounds on Microalgae and Mechanisms for Carbon Assimilation and Utilization	carbon; carbon dioxide fixation; flue gas; metabolism; microalgae	To shift the world to a more sustainable future, it is necessary to phase out the use of fossil fuels and focus on the development of low-carbon alternatives. However, this transition has been slow, so there is still a large dependence on fossil-derived power, and therefore, carbon dioxide is released continuously. Owing to the potential for assimilating and utilizing carbon dioxide to generate c…	ChemSusChem
512	2018	Spiegel S.J., Agrawal S., Mikha D., Vitamerry K., Le Billon P., Veiga M., Konolius K., Paul B.	Phasing Out Mercury? Ecological Economics and Indonesia's Small-Scale Gold Mining Sector	Artisanal gold mining; Cleaner technology; Ecological economics; Environmental governance; Marginalisation; Mercury pollution; Minamata Convention on Mercury; Small-scale gold mining	This article uses an ecological economics approach to analyse tensions surrounding efforts to phase out mercury in Indonesia's artisanal and small-scale gold mining (ASGM) sector, among the largest sources of mercury pollution worldwide. Many scholars and environmental activists have long hoped that global restrictions in mercury trade would drive up mercury prices and decrease mercury use and po…	Ecological Economics
513	2018	Gupta J., Arts K.	Achieving the 1.5 °c objective: Just implementation through a right to (sustainable) development approach	Carbon budget; Climate change; Human rights; Right to Development; Right to Promote Sustainable Development	Achieving the 1.5 °C objective of the Paris Agreement on Climate Change in a just manner requires equitably sharing the responsibilities and rights that relate to this objective. This paper examines how international law concerning the Right to Promote (Sustainable) Development can contribute to determining what would be a “just” approach to achieving the 1.5 °C objective. This entails building o…	International Environmental Agreements: Politics, Law and Economics
514	2018	Utizi K., Notti E., Sala A., Buzzi A., Rodella I., Simeoni U., Corbau C.	Impact assessment of EMFF measures on Good Environmental Status (GES) as defined by Italy	CFP; Expert judgment approach; Fisheries management; MSFD; Sustainable fisheries and aquaculture	Fisheries involve an intensive use of European maritime regions according to the Common Fisheries Policy (CFP). The recent CFP reform has adopted an ecosystem-based approach to fisheries management that is characterised by enhanced regionalisation and multi-annual management plans. It aims to avoid the adverse environmental impacts of fishing activities, which are to be mitigated as far as possib…	Marine Policy
515	2018	Civancik D., Yetis U.	Substance flow analysis of mercury in Turkey for policy decision support	Anthropogenic mercury; Mercury; Release inventory; SFA; Substance flow analysis; Turkey	Identification and quantification of mercury flows in Turkey are essential for better policy development regarding to the implementation of water-related legislation. To this end, substance flow analysis (SFA) of mercury in Turkey was conducted in order to identify and quantify mercury releases to different environmental compartments and help policy decision makers to better understand their opti…	Environmental Science and Pollution Research
516	2018	Edenhofer O., Steckel J.C., Jakob M., Bertram C.	Reports of coal's terminal decline may be exaggerated	(I)NDCs; carbon lock-in; coal; Paris Agreement	We estimate the cumulative future emissions expected to be released by coal power plants that are currently under construction, announced, or planned. Even though coal consumption has recently declined and plans to build new coal-fired capacities have been shelved, constructing all these planned coal-fired power plants would endanger national and international climate targets. Plans to build new …	Environmental Research Letters
517	2018	Teske S., Pregger T., Simon S., Naegler T.	High renewable energy penetration scenarios and their implications for urban energy and transport systems		To meet the terms of the 2015 Paris Agreement, the global energy system must be entirely decarbonized by the end of this century. Two scenarios have been developed: a reference case (REF) and an advanced 100% renewable energy scenario (ADV). ADV reflects the trends in global energy systems and will decarbonize the entire energy system by 2050. Those results are compared with the IPCC AR5 450 ppm …	Current Opinion in Environmental Sustainability
518	2018	Amaroli A., Gallus L., Ferrando S.	Permethrin drastically affects the developmental cycle of the non-target slime mould Dictyostelium discoideum	Integrated pest management; Naked amoebae; Pyrethroids; Soil protozoa; Sustainable agriculture	The use of pyrethroids has increased throughout the world over the past few decades, as organophosphate, carbamate and organochlorine insecticides are being phased out. Permethrin is widely used in the USA for crops treatment, at concentrations around 750 × 103 μg/L. In our study 3.6 μg/L permethrin decreases the fission-rate and the fruiting bodies formation of slime mould Dictyostelium discoide…	Chemosphere
519	2018	Schellenberger S., Gillgard P., Stare A., Hanning A., Levenstam O., Roos S., Cousins I.T.	Facing the rain after the phase out: Performance evaluation of alternative fluorinated and non-fluorinated durable water repellents for outdoor fabrics	Chemical alternatives assessment; Oil repellency; Per- and polyfluoroalkyl substances outdoor apparel; Sustainability; Water repellency	Fluorinated durable water repellent (DWR) agents are used to obtain water and stain repellent textiles. Due to the on-going phase-out of DWRs based on side-chain fluorinated polymers (SFP) with “long” perfluoroalkyl chains, the textile industry lacks suitable alternatives with comparable material characteristics. The constant development and optimization of SFPs for textile applications initiated…	Chemosphere
520	2018	Jewell J., McCollum D., Emmerling J., Bertram C., Gernaat D.E.H.J., Krey V., Paroussos L., Berger L., Fragkiadakis K., Keppo I., Saadi N., Tavoni M., Van Vuuren D., Vinichenko V., Riahi K.	Limited emission reductions from fuel subsidy removal except in energy-exporting regions		Hopes are high that removing fossil fuel subsidies could help to mitigate climate change by discouraging inefficient energy consumption and levelling the playing field for renewable energy. In September 2016, the G20 countries re-affirmed their 2009 commitment (at the G20 Leaders' Summit) to phase out fossil fuel subsidies and many national governments are using today's low oil prices as an oppor…	Nature
521	2018	Seidl R., Albrich K., Thom D., Rammer W.	Harnessing landscape heterogeneity for managing future disturbance risks in forest ecosystems	Climate change impacts; Forest disturbance regimes; iLand; Landscape management; Risk management; Timber production	In order to prevent irreversible impacts of climate change on the biosphere it is imperative to phase out the use of fossil fuels. Consequently, the provisioning of renewable resources such as timber and biomass from forests is an ecosystem service of increasing importance. However, risk factors such as changing disturbance regimes are challenging the continuous provisioning of ecosystem services…	Journal of Environmental Management
522	2018	Michalena E., Kouloumpis V., Hills J.M.	Challenges for Pacific Small Island Developing States in achieving their Nationally Determined Contributions (NDC)	Climate change mitigation; Energy mixes; Nationally Determined Contributions; Pacific Small Island Developing States; Renewable energy	The international community directs significant funding towards Pacific Small Island Developing States (PSIDS) for climate change allowing ambitious target setting. The Nationally Determined Contribution (NDC) of Fiji targets 81% of renewable energy share in grid electricity supply by 2020 and 100% by 2030. A model is developed to determine possible energy transitions to achieve those targets. Th…	Energy Policy
523	2018	Kungl G., Geels F.W.	Sequence and alignment of external pressures in industry destabilisation: Understanding the downfall of incumbent utilities in the German energy transition (1998–2015)	Electricity transition; German electricity industry; Industry destabilisation; Multiple external pressures	This article makes two contributions to the emerging research stream on regime and industry destabilisation in the transition literature. First, we replicate the multi-dimensional framework developed by Turnheim and Geels with a more contemporary study that has closer links to sustainability transitions. Drawing on a wide range of primary and secondary sources, we analyse the destabilisation of t…	Environmental Innovation and Societal Transitions
524	2018	Mouratiadou I., Bevione M., Bijl D.L., Drouet L., Hejazi M., Mima S., Pehl M., Luderer G.	Water demand for electricity in deep decarbonisation scenarios: a multi-model assessment		This study assesses the effects of deep electricity decarbonisation and shifts in the choice of power plant cooling technologies on global electricity water demand, using a suite of five integrated assessment models. We find that electricity sector decarbonisation results in co-benefits for water resources primarily due to the phase-out of water-intensive coal-based thermoelectric power generatio…	Climatic Change
525	2018	Shunthirasingham C., Alexandrou N., Brice K.A., Dryfhout-Clark H., Su K., Shin C., Park R., Pajda A., Noronha R., Hung H.	Temporal trends of halogenated flame retardants in the atmosphere of the Canadian Great Lakes Basin (2005-2014)		Organic pollutants have been monitored in the atmosphere of the Great Lake Basin (GLB) since the 1990s in support of the Canada-US Great Lakes Water Quality Agreement and to determine the effectiveness of source reduction measures and factors influencing air concentrations. Air samples were collected between 2005 and 2014 at three sites with different geographical characteristics (Burnt Island, E…	Environmental Science: Processes and Impacts
526	2018	Feng X.-Z., Lugovoy O., Qin H.	Co-controlling CO2 and NOx emission in China's cement industry: An optimal development pathway study	Cement industry; Co-benefit analysis; CO2 abatement; NOx reduction	It is of important practical significance to reduce NOx emission and CO2 emission in China's cement industry. This paper firstly identifies key factors that influence China's future cement demand, and then uses the Gompertz model to project China's future cement demand and production. Furthermore, the multi-pollutant abatement planning model (MAP) was developed based on the TIMES model to analyze…	Advances in Climate Change Research
527	2018	Werner C., Schmidt H.-P., Gerten D., Lucht W., Kammann C.	Biogeochemical potential of biomass pyrolysis systems for limiting global warming to 1.5 °c	1.5 goal; bio-oil; biochar; geoengnieering; mitigation; Negative emission technologies; PyCCS	Negative emission (NE) technologies are recognized to play an increasingly relevant role in strategies limiting mean global warming to 1.5 °C as specified in the Paris Agreement. The potentially significant contribution of pyrogenic carbon capture and storage (PyCCS) is, however, highly underrepresented in the discussion. In this study, we conduct the first quantitative assessment of the global p…	Environmental Research Letters
528	2018	Fischer R., Elfgren E., Toffolo A.	Energy supply potentials in the northern counties of Finland, Norway and Sweden towards sustainable nordic electricity and heating sectors: A review	Energy supply; Nordic countries; Potentials; Renewable sources	The lands in the northernmost corner of Europe present contradictory aspects in their social and economic development. Urban settlements are relatively few and small-sized, but rich natural resources (minerals, forests, rivers) attract energy-intensive industries. Energy demand is increasing as a result of new investments in mining and industries, while reliable energy supply is threatened by the…	Energies
529	2018	Sarkar S., Fan W.H., Jia S., Blake D.R., Reid J.S., Lestari P., Yu L.E.	A quantitative assessment of distributions and sources of tropospheric halocarbons measured in Singapore	Chlorofluorocarbons (CFCs); Hydrochlorofluorocarbons (HCFCs); Montreal Protocol; Positive matrix factorization (PMF); Short-lived halocarbons; Southeast Asia	This work reports the first ground-based atmospheric measurements of 26 halocarbons in Singapore, an urban-industrial city-state in Southeast (SE) Asia. A total of 166 whole air canister samples collected during two intensive 7 Southeast Asian Studies (7SEAS) campaigns (August–October 2011 and 2012) were analyzed for C1-C2 halocarbons using gas chromatography-electron capture/mass spectrometric d…	Science of the Total Environment
530	2018	Agrawal N., Ahiduzzaman M., Kumar A.	The development of an integrated model for the assessment of water and GHG footprints for the power generation sector	GHG emissions; LEAP-WEAP integration; Power sector; Water demand; Water-energy nexus	To ensure the use of water today does not damage the prospects for its use by future generations, there is need to understand long-term water demand and supply through energy production, conversion, and use. This study aims to develop an integrated framework to assess the long-term impacts of climate change scenarios on water requirements and greenhouse gas (GHG) emissions. The framework includes…	Applied Energy
531	2018	Acar S., Challe S., Christopoulos S., Christo G.	Fossil fuel subsidies as a lose-lose: Fiscal and environmental burdens in Turkey	Coal subsidies; energy policy; fossil fuel subsidies; sustainable development	Attempts at common agreements to phase out fossil fuel subsidies (FFS) have been increasing, as the topic generated momentum through the Rio Dialogues prior to the 2012 United Nations Conference on Sustainable Development (Rio+20) and following the Paris Agreement in 2016. This study quantifies the magnitude and the relative importance of FFS in the Turkish economy and produces a relevant nationa…	New Perspectives on Turkey
532	2018	Portugal-Pereira J., Koberle A., Lucena A.F.P., Rochedo P.R.R., Império M., Carsalade A.M., Schaeffer R., Rafaj P.	Interactions between global climate change strategies and local air pollution: lessons learnt from the expansion of the power sector in Brazil	Energy use in the power sector; Environmental co-benefits; MESSAGE-Brazil	This study examines the interactions between local air pollutants and greenhouse gas emissions to assess potential synergies and trade-offs between local environmental pollution and climate policies, using the power generation sector in Brazil under different carbon scenarios up to 2050 as a case study. To this end, an integrated approach was developed, combining energy scenarios under different …	Climatic Change
533	2018	Yu X., Nishimura F., Hidaka T.	Enhanced generation of perfluoroalkyl carboxylic acids (PFCAs) from fluorotelomer alcohols (FTOHs) via ammonia-oxidation process	Activated sludge; Ammonia monooxygenases; Cometabolism; FTOHs; Nitrification; PFCAs	With the phase-out of persistent, bioaccumalative, and toxic perfluoroalkyl carboxylic acids (PFCAs), it is needed to explore the potential release of PFCAs from precursors being emitted into the environment. Biotransformation of fluorotelomer alcohols (FTOHs) via biological processes in wastewater treatment plants (WWTPs) leads to discharge of PFCAs into receiving waters. However, the commonly e…	Chemosphere
534	2018	Gewurtz S.B., Martin P.A., Letcher R.J., Burgess N.M., Champoux L., Elliott J.E., Idrissi A.	Perfluoroalkyl Acids in European Starling Eggs Indicate Landfill and Urban Influences in Canadian Terrestrial Environments		Perfluoroalkyl acids (PFAAs) were determined in European starling (Sturnus vulgaris) eggs collected between 2009 and 2014 from industrial, rural/agricultural, and landfill locations within five urban centers across Canada. Within each urban center, perfluoroalkyl sulfonic acid (PFSA) concentrations were generally greater in starling eggs collected from urban/industrial locations and PFSAs and per…	Environmental Science and Technology
535	2018	Montzka S.A., Dutton G.S., Yu P., Ray E., Portmann R.W., Daniel J.S., Kuijpers L., Hall B.D., Mondeel D., Siso C., Nance J.D., Rigby M., Manning A.J., Hu L., Moore F., Miller B.R., Elkins J.W.	An unexpected and persistent increase in global emissions of ozone-depleting CFC-11		The Montreal Protocol was designed to protect the stratospheric ozone layer by enabling reductions in the abundance of ozone-depleting substances such as chlorofluorocarbons (CFCs) in the atmosphere 1-3 . The reduction in the atmospheric concentration of trichlorofluoromethane (CFC-11) has made the second-largest contribution to the decline in the total atmospheric concentration of ozone-depletin…	Nature
536	2018	Ho M.-S.	Taiwan’s Anti-Nuclear Movement: The Making of a Militant Citizen Movement	Anti-nuclear movement; environmentalism; movement strategy; protest; social movements; Taiwan	Social movement studies have constantly focused on research relating to movement strategy, without reaching a consensus on the most viable strategies for realising a movement’s goal. Instead of conceptualising movement strategy as merely a product of movement leaders’ rational calculations, this article analyses a case of strategy shift attributable to leadership replacement and unexpected events…	Journal of Contemporary Asia
537	2018	Rosenbloom D.	Framing low-carbon pathways: A discursive analysis of contending storylines surrounding the phase-out of coal-fired power in Ontario	Coal phase-out; Discourse; Framing; Multi-dimensional discursive approach; Pathways; Transitions	Transition studies have made constructive efforts to attend more closely to the politics of sustainability transitions, with discourse emerging as an increasingly important means of interrogating these dynamics. Drawing on discourse perspectives, this study deploys the multi-dimensional discursive approach to explore framing struggles surrounding a climate change mitigation experience of internat…	Environmental Innovation and Societal Transitions
538	2018	Duan H., Miller T.R., Liu G., Zeng X., Yu K., Huang Q., Zuo J., Qin Y., Li J.	Chilling Prospect: Climate Change Effects of Mismanaged Refrigerants in China		The global community has responded to the dual threats of ozone depletion and climate change from refrigerant emissions (e.g., chlorofluorocarbons, CFCs, and hydrofluorocarbons, HFCs) in refrigerators and air conditioners (RACs) by agreeing to phase out the production of the most damaging chemicals and replacing them with substitutes. Since these refrigerants are "banked" in products during their…	Environmental Science and Technology
539	2018	Hirons M., McDermott C., Asare R., Morel A., Robinson E., Mason J., Boyd E., Malhi Y., Norris K.	Illegality and inequity in Ghana's cocoa-forest landscape: How formalization can undermine farmers control and benefits from trees on their farms	Cocoa; FLEGT VPA; Forest; Formalisation; Ghana; Timber	Schemes to promote sustainable forest management have increasingly focused on addressing widespread informalities in timber production, based on the presumed links between formalisation, the maintenance of forest cover and local welfare. This trend is typified by the EU Forest Law Enforcement, Governance and Trade (FLEGT) initiative and associated Voluntary Partnership Agreements (VPA) aimed at e…	Land Use Policy
540	2018	Abas N., Kalair A.R., Khan N., Haider A., Saleem Z., Saleem M.S.	Natural and synthetic refrigerants, global warming: A review	Global Warming Potential (GWP); Natural refrigerants; Ozone Depletion Potential (ODP)	Halogenated hydrocarbons with high ozone depletion potential (ODP) were banned under Montreal Protocol (1987) due to their detrimental effects on ozone layer that shields the planet against ultraviolet radiations. The greenhouse gases (GHG) used in modern refrigeration, air conditioning, and heat pumping systems, are under Kyoto Protocol (1997)’s time-barred permission period. In order to reduce …	Renewable and Sustainable Energy Reviews
541	2018	Duan H., Wang S.	Potential impacts of China's climate policies on energy security	Climate policies; Co-benefits analysis; Emission budget; Energy security; System integrated modeling	Energy security, as an indispensable constituent of economic security, has long been a top research priority, and the dynamics of energy security become particularly complicated with the involvement of climate change. In this work, we combined a one-sector integrated assessment framework with a series of well-proposed energy security metrics to extensively explore the unidirectional consistency b…	Environmental Impact Assessment Review
542	2018	Aaseth J., Hilt B., Bjørklund G.	Mercury exposure and health impacts in dental personnel	Dental practice; Health effects; Mercury toxicodynamic; Mercury toxicokinetic; Metallic mercury	Based on toxicological, clinical, and epidemiological knowledge, the present paper reviews the status regarding possible deleterious health effects from occupational exposure to metallic mercury (Hg) in dental practice. Symptoms from the central nervous system are among the health problems that most often are attributed to Hg exposure in dentists and dental nurses working with amalgam. Uncharacte…	Environmental Research
543	2018	Kiuila O.	Decarbonisation perspectives for the Polish economy	C68; Computable general equilibrium modeling; D58; Dynamics; Energy technologies; Q43; Q58	In the coming decades the energy sector in Poland will undergo a substantial transition towards low carbon usage, which will have a predominant impact on the economy. Several modernization scenarios for energy policy are currently being discussed by the government and not yet concluded. The main objective of this paper is to provide a tool that allows to simulate such scenarios and to show the im…	Energy Policy
544	2018	Kim K.-S.	Changes in risk perception of Seoul National University students in nuclear power under opposing government policy	Climate change; Conditional support; Energy security; Nuclear acceptance; Risk perception	This study examined how the perceptions of the risks from nuclear power have changed as the government policy has changed from nuclear-friendly to nuclear phase-out. In 2009, the concern about climate change was growing, and the government's new policy of "low carbon green growth" received wide public support (KNEA, 2014). In 2018, however, the present government is promoting a nuclear phase-out …	Sustainability (Switzerland)
545	2018	Grandjean P.	Delayed discovery, dissemination, and decisions on intervention in environmental health: A case study on immunotoxicity of perfluorinated alkylate substances		Identification and characterization of environmental hazards that impact human health must rely on the best possible science to inform and inspire appropriate public health intervention. The perfluorinated alkylate substances (PFASs) are persistent emerging pollutants that are now being recognized as important human health hazards. Although the PFASs have been produced for over 60 years, academic…	Environmental Health: A Global Access Science Source
546	2018	Poudineh R., Sen A., Fattouh B.	Advancing renewable energy in resource-rich economies of the MENA	Combinatorial approach; MENA resource-rich countries; Removing fossil fuel subsidies; Renewable barriers; Renewable incentives; Renewable subsidies	As much of the world pushes ahead with the deployment of renewable energy, resource-rich MENA economies are lagging behind. This paper contends that while the main obstacles to deployment of renewables are grid infrastructure inadequacy, insufficient institutional capacity, and risks and uncertainties, the investment incentives lie on a policy instrument spectrum with two polar solutions: (i) the…	Renewable Energy
547	2018	Beecher N., Brown S.	Managing organics in the “PFAS age”		The only significant issue for biosolids and organic residual management related to PFAS is potential leaching that impacts drinking water (and possibly surface water). The mere presence of PFAS in organic residuals is not evidence of risk or even significant exposure in excess of current PFAS exposure in our daily lives. Home exposure to these compounds remains a major, significant pathway for t…	BioCycle
548	2018	Björlenius B., Ripszám M., Haglund P., Lindberg R.H., Tysklind M., Fick J.	Pharmaceutical residues are widespread in Baltic Sea coastal and offshore waters – Screening for pharmaceuticals and modelling of environmental concentrations of carbamazepine	Baltic Sea; Carbamazepine; Coastal and offshore waters; Half-life time; Model; Pharmaceuticals	The consumption of pharmaceuticals worldwide coupled with modest removal efficiencies of sewage treatment plants have resulted in the presence of pharmaceuticals in aquatic systems globally. In this study, we investigated the environmental concentrations of a selection of 93 pharmaceuticals in 43 locations in the Baltic Sea and Skagerrak. The Baltic Sea is vulnerable to anthropogenic activities d…	Science of the Total Environment
549	2018	Gao A.M.-Z., Fan C.-T., Liao C.-N.	Application of German energy transition in Taiwan: A critical review of unique electricity liberalisation as a core strategy to achieve renewable energy growth	Electricity liberalisation; Energiewende; Energy transition; Renewable Energy Development Act; Taiwan Electricity Liberalisation Act of 2017	Since the launch of the Energiewende (Energy Transition) in Germany in 2010, the concept influences on energy and climate policies around the globe. In May 2016, the Taiwan government began promoting renewable energy (RE) and phasing out nuclear power. However, it has not used the Renewable Energy Development Act, which is similar to the German Erneuerbare Energien Gesetz, as the main instrument.…	Energy Policy
550	2018	Rogge K.S., Dütschke E.	What makes them believe in the low-carbon energy transition? Exploring corporate perceptions of the credibility of climate policy mixes	Coherence; Comprehensiveness; Consistency; Credibility; Energy transition; Policy mix	The credibility of climate policy has been identified as paramount factor for low-carbon investment and innovation and is thus key to achieving the decarbonization objectives set out in the Paris Agreement. Yet, despite its importance, we have only limited insights at present into how such policy credibility is formed. To address this gap, we explore whether and to what extent corporate perceptio…	Environmental Science and Policy
551	2018	An R., Yu B., Li R., Wei Y.-M.	Potential of energy savings and CO2 emission reduction in China's iron and steel industry	Abatement cost; CO2 emissions; Energy consumption; Iron and steel industry; National Energy Technology model; Technology development path	The iron and steel industry plays an important role in mitigating global climate change. As the largest steel producer and consumer, China bears the primary responsibility for energy savings and CO2 emission reduction in the iron and steel industry. In this study, taking China as the empirical context, we analyze the effectiveness of the following four strategies on the potential of energy saving…	Applied Energy
552	2018	Gaete-Morales C., Gallego-Schmid A., Stamford L., Azapagic A.	Assessing the environmental sustainability of electricity generation in Chile	Climate change; Environmental sustainability; Fossil fuels; LCA; Renewable technologies; Resource depletion	Around 40% of electricity in Chile is supplied by renewables and the rest by fossil fuels. Despite the growing electricity demand in the country, its environmental impacts are as yet unknown. To address this gap, the current study presents the first comprehensive assessment of the life cycle environmental sustainability of electricity generation in Chile. Both the individual sources and the elect…	Science of the Total Environment
553	2018	Galbieri R., Brito T.L.F., Mouette D., de Medeiros Costa H.K., Moutinho dos Santos E., Fagá M.T.W.	Bus fleet emissions: new strategies for mitigation by adopting natural gas	Atmospheric emission; Bus technologies; Compressed natural gas; São Paulo	Energy consumption is related to local, regional and global impacts. Thus, by comparing different replacement scenarios of diesel vehicles with compressed natural gas, this article estimates pollutants and greenhouse gases emission in the city of São Paulo, Brazil. The calculation of fuel consumption is based on fleet characteristics, in terms of vehicle age, the average annual distance travelled…	Mitigation and Adaptation Strategies for Global Change
554	2018	Gallen C., Eaglesham G., Drage D., Nguyen T.H., Mueller J.F.	A mass estimate of perfluoroalkyl substance (PFAS) release from Australian wastewater treatment plants	Australia; Biosolids; Perfluoroalkyl substances (PFASs); Perfluorooctanoic acid (PFOA); Perflurooctane sulfonate (PFOS); Wastewater	Perfluoroalkyl substances (PFASs) have been used in large quantities for a variety of applications in Australian industry and household products. Through the course of their everyday use, PFASs enter the wastewater stream however current treatment processes provide only partial removal of these chemicals from wastewater. The release of treated effluent and re-use of biosolids represents an import…	Chemosphere
555	2018	Xing X., Kang J., Qiu J., Zhong X., Shi X., Zhou B., Wei Y.	Waterborne exposure to low concentrations of BDE-47 impedes early vascular development in zebrafish embryos/larvae	Brominated flame retardants; Developmental toxicity; Early exposure; Polybrominated diphenyl ethers; Vascular toxicity; Zebrafish	Polybrominated diphenyl ethers (PBDEs) are persistent flame retardants ubiquitously existing in various environment matrices. In spite of a recent reduction in use according to the phase-out policy, high levels of PBDEs are still found in both environmental and biological samples due to their persistent property and large-scale production over a long history. Developmental toxicity is a major hea…	Aquatic Toxicology
556	2018	Piggot G., Erickson P., van Asselt H., Lazarus M.	Swimming upstream: addressing fossil fuel supply under the UNFCCC	fossil fuels; Paris Agreement; supply-side climate policy; UNFCCC	Reducing fossil fuel supply is necessary to meet the Paris Agreement goal to keep warming ‘well below 2°C’, yet the Agreement is silent on the topic of fossil fuels. This article outlines reasons why it is important that Parties to the Agreement find ways to more explicitly address the phasing out of fossil fuel production under the UNFCCC. It describes how countries aiming to keep fossil fuel su…	Climate Policy
557	2018	Chen C.-L., Kuo P.-H., Lee T.-C., Liu C.-H.	Snow lines on shorelines: Solving Styrofoam buoy marine debris from oyster culture in Taiwan	Derelict fishing gear; Marine debris management; Oyster culture; Styrofoam buoys	Styrofoam buoy marine debris from oyster farming presents a tough management issue in Taiwan. It is an environmental externality but its associated environmental costs have long been neglected. In the pursuit of environmental sustainability, efforts by authorities have been made; yet the problem remains. In an attempt to enhance Styrofoam buoy marine debris management, this paper used document an…	Ocean and Coastal Management
558	2018	Holmquist H., Jagers S.C., Matti S., Svanström M., Peters G.M.	How information about hazardous fluorinated substances increases willingness-to-pay for alternative outdoor garments: A Swedish survey experiment	Per- and polyfluoroalkyl substances; PFAS; Phase-out; Survey experiment; Voluntary; Willingness-to pay	Many outdoor garments are impregnated to make them water and, in some cases oil repellent, but the impregnation agents can be hazardous to human health and the environment. Some examples of such hazardous impregnation agents include per- and polyfluoroalkyl substances. To reduce the risks related to these fluorinated substances, a phase-out is necessary, and voluntary avoidance by consumers may b…	Journal of Cleaner Production
559	2018	Vögele S., Kunz P., Rübbelke D., Stahlke T.	Transformation pathways of phasing out coal-fired power plants in Germany	Coal-fired power plants; Multi-level perspective; Phase-out; Transformation pathways	Background: While there are plenty of studies investigating the market penetration of new technologies, phase-out processes of a predominant technology are rarely analyzed. The present study explores the case of a declining technology, employing the example of coal-fired power plants in Germany. These plants were promoted by governmental decision-makers as well as by the industry for a long time,…	Energy, Sustainability and Society
560	2018	Krysovatyy A.I., Zvarych I.Y., Zvarych R.Y., Zhyvko M.A.	Preconditions for the tax environment of a alterglobal development	alterglobalization; circular economy; circular tax policy; environmental performance index; green taxes; new economy	In this article, we analyzed economic surroundings as a precondition for the development of the tax environment in the context of alterglobal development. We admitted that economic globalization is harmful to the environment because it depends on its own viability: the constant increase in commodity consumption, the increased use of resources and the growing disposition to pollute waste in the oc…	Comparative Economic Research
561	2018	Medick J., Teichmann I., Kemfert C.	Hydrothermal carbonization (HTC) of green waste: Mitigation potentials, costs, and policy implications of HTC coal in the metropolitan region of Berlin, Germany	Biocoal; Bioenergy; Char; Climate change; Hydrothermal carbonization; Life cycle	We quantify the greenhouse-gas mitigation potential and carbon abatement costs if green waste in the metropolitan region of Berlin, Germany, is diverted from composting into the production of hydrothermally carbonized coal (HTC coal) that is used to substitute for hard coal in electricity and heat generation. Depending on the origin of the green waste, we specify an urban, a rural-urban, and a ru…	Energy Policy
562	2018	Patrizio P., Leduc S., Kraxner F., Fuss S., Kindermann G., Mesfun S., Spokas K., Mendoza A., Mac Dowell N., Wetterlund E., Lundgren J., Dotzauer E., Yowargana P., Obersteiner M.	Reducing US Coal Emissions Can Boost Employment	BECCS; coal phase out; coal sector; coal workers; energy sector employment; forest management; job creation; natural gas; negative emissions; RCP pathways; RCP2.6; US coal workers; USA	Concerns have been voiced that implementing climate change mitigation measures could come at the cost of employment, especially in the context of the US coal sector. However, repurposing US coal plants presents an opportunity to address emission mitigation and job creation, if the right technology change is adopted. In this study, the transformation of the US coal sector until 2050 is modeled to …	Joule
563	2018	Choudhari C.S., Sapali S.N.	Testing of environment friendly refrigerant R290 for water cooler application	Coefficient of Performance; Experimentation; Refrigerant R290; Water Cooler	This paper presents environment friendly refrigerant R290 as a solution to the environmental concerns like depletion of ozone layer and rise in global warming because of wide use of synthetic refrigerants R22 and R134a. The water cooler is the widely used refrigeration application in warm climatic countries. Refrigerant R22 and R134a are predominantly used refrigerants in water cooler refrigerati…	International Journal of Engineering, Transactions A: Basics
564	2018	Pickard H.M., Criscitiello A.S., Spencer C., Sharp M.J., Muir D.C.G., De Silva A.O., Young C.J.	Continuous non-marine inputs of per- and polyfluoroalkyl substances to the High Arctic: A multi-decadal temporal record		Perfluoroalkyl acids (PFAAs) are persistent, in some cases, bioaccumulative compounds found ubiquitously within the environment. They can be formed from the atmospheric oxidation of volatile precursor compounds and undergo long-range transport (LRT) through the atmosphere and ocean to remote locations. Ice caps preserve a temporal record of PFAA deposition making them useful in studying the atmos…	Atmospheric Chemistry and Physics
565	2018	Kretschmann J.	Post-mining excellence: Strategy and transfer	German hard coal mining; Post-mining era; Sustainable development strategy	In 2007, a political understanding was arranged to phase out German hard coal mining (GHCM) in a socially acceptable manner by the end of 2018, after more than 200 years of production. This decision required a new strategy in order to prepare the GHCM industry for the post-mining era. To create a sustainable development strategy (SDS), the long-term impacts of GHCM activities concerning the envir…	Journal of the Southern African Institute of Mining and Metallurgy
566	2018	Mutanga S.S., Quitzow R., Steckel J.C.	Tackling energy, climate and development challenges in Africa	Africa; climate policy; Sustainable development	In order to fulfill multiple sustainable development targets, most prominently human development, poverty eradication and climate change mitigation, African countries need infrastructure that cover basic needs while at the same time promote industrialization and value creation. G20 countries can support African countries by: (1) aligning and cementing the G20 Agenda for Africa with African initia…	Economics
567	2019	Bianchi A., Delsanto S., Dupieux P., Ferretti A., Gagliardi M., Joly B., Manen S.P., Marchisone M., Micheletti L., Rosano A., Vercellin E.	Characterization of tetrafluoropropene-based gas mixtures for the Resistive Plate Chambers of the ALICE muon spectrometer	Gaseous detectors; Resistive-plate chambers	The muon identification system of the ALICE experiment at the CERN LHC is based on Resistive Plate Chamber (RPC) detectors. These RPCs are operated in the so-called maxi-avalanche mode with a gas mixture made of tetrafluoroethane (C2H2F4), sulfur hexafluoride (SF6) and isobutane (i-C4H10). All of these components are greenhouse gases: in particular, the first gas is already phasing out of product…	Journal of Instrumentation
568	2019	Andrady A.L., Pandey K.K., Heikkilä A.M.	Interactive effects of solar UV radiation and climate change on material damage		Solar UV radiation adversely affects the properties of organic materials used in construction, such as plastics and wood. The outdoor service lifetimes of these materials are influenced by their rates of degradation under solar UV radiation as well as by other climate factors such as temperature, moisture, and atmospheric pollutants. While recovery of the stratospheric ozone layer is expected, lo…	Photochemical and Photobiological Sciences
569	2019	Schmidt D., Singleton J., Bradshaw C.R.	Development of a light-commercial compressor load stand to measure compressor performance using low-GWP refrigerants [Développement de supports de charge de compresseur commercial léger pour mesurer la performance d'un compresseur fonctionnant avec des frigorigènes à faible GWP]	Compressor; Compressor efficiency; Hot-gas bypass; Load stand; Low-GWP	Popular hydrofluorocarbon refrigerants such as R134a and R410A are in the process of being phased out due to the high Global Warming Potential (GWP) of these fluids. A large variety of low-GWP refrigerants are being considered as replacements including R1234yf, R1234ze(E), R1234ze(D), R32, and blends of these with traditional refrigerants. As a result of high efficiency standards for HVAC&R equip…	International Journal of Refrigeration
570	2019	Fang X., Pyle J.A., Chipperfield M.P., Daniel J.S., Park S., Prinn R.G.	Challenges for the recovery of the ozone layer		The recovery of stratospheric ozone from past depletion is underway owing to the 1987 Montreal Protocol and its subsequent amendments, which have been effective in phasing out the production and consumption of the major ozone-depleting substances (ODSs). However, there is uncertainty about the future rate of recovery. This uncertainty relates partly to unexpected emissions of controlled anthropog…	Nature Geoscience
571	2019	Newth J.L., Lawrence A., Cromie R.L., Swift J.A., Rees E.C., Wood K.A., Strong E.A., Reeves J., McDonald R.A.	Perspectives of ammunition users on the use of lead ammunition and its potential impacts on wildlife and humans	ammunition; environmental contaminants; hunters; hunting; lead; Q methodology; shooting; waterfowl	Recent national and international policy initiatives have aimed to reduce the exposure of humans and wildlife to lead from ammunition. Despite restrictions, in the UK, lead ammunition remains the most widespread source of environmental lead contamination to which wildlife may be exposed. The risks arising from the use of lead ammunition and the measures taken to mitigate these have prompted inten…	People and Nature
572	2019	Nawaz K., Ally M.R.	Options for low-global-warming-potential and natural refrigerants Part 2: Performance of refrigerants and systemic irreversibilities [Options de frigorigènes naturels à faible potentiel de réchauffement planétaire 2nde partie: Performance des frigorigènes et irréversibilités systémiques]	Exergy; Heat pump cycles; Irreversibility; Low GWP	There is growing interest in substituting existing refrigerants with low global warming potential (GWP) refrigerants, including naturally occurring fluids, to reduce the impact of human activities on climate change. In the Part I of the study, we examined 13 refrigerants from the perspective of the characteristic shape of their respective temperature–entropy (T–S) and the logarithm of the pressur…	International Journal of Refrigeration
573	2019	Janousek R.M., Mayer J., Knepper T.P.	Is the phase-out of long-chain PFASs measurable as fingerprint in a defined area? Comparison of global PFAS concentrations and a monitoring study performed in Hesse, Germany from 2014 to 2018	Monitoring; PFAS; PFBA; PFOA; PFOS; Phase-out; Replacement chemicals; Short-chain PFAS	Perfluoroalkyl and polyfluoroalkyl substances (PFASs) represent a group of anthropogenic chemicals that were produced since the 1950s, however, voluntary and legal actions against the use of legacy PFASs were only implemented in recent years. These actions are aimed to trigger certain trends in PFAS chemistry, leading to the introduction of novel PFASs or the fortified use of short-chain derivati…	TrAC - Trends in Analytical Chemistry
574	2019	Smith C.J., Forster P.M., Allen M., Fuglestvedt J., Millar R.J., Rogelj J., Zickfeld K.	Current fossil fuel infrastructure does not yet commit us to 1.5 °C warming		Committed warming describes how much future warming can be expected from historical emissions due to inertia in the climate system. It is usually defined in terms of the level of warming above the present for an abrupt halt of emissions. Owing to socioeconomic constraints, this situation is unlikely, so we focus on the committed warming from present-day fossil fuel assets. Here we show that if ca…	Nature Communications
575	2019	Feng H., Ruan Y., Zhang K., Lam P.K.S.	Current analytical methodologies and gaps for per- and polyfluoroalkyl substances determination in the marine environment	Detection techniques; Extractable organic fluorine; Marine environment; Per- and polyfluoroalkyl substances; Risk assessment; Sample treatment	Per- and polyfluoroalkyl substances (PFASs) have attracted worldwide concern. As the phase-out and substitution of PFASs continue to progress, substantial research efforts are being invested into researching the distribution and potential adverse effects of these substances. Oceans are the main final global sinks for most PFASs, and the marine environment plays a key role in their global transpor…	TrAC - Trends in Analytical Chemistry
576	2019	Brauch M.D., Touchette Y., Cosbey A., Gerasimchuk I., Sanchez L., Bernasconi-Osterwalder N., Garcia M.B.T., Potaskaevi T., Petrofsky E.	Treaty on sustainable investment for climate change mitigation and adaptation: Aligning international investment law with the urgent need for climate change action		The climate change mitigation and adaptation objectives set by the Paris Agreement under the United Nations Framework Convention on Climate Change (UNFCCC) and the broader Sustainable Development Goals (SDGs) under the Agenda 2030 create a need for an unprecedented shift from carbon-intensive to low-carbon investment projects. Investment and the legal regimes that govern it-including internationa…	Journal of International Arbitration
577	2019	Brown B., Spiegel S.J.	Coal, climate justice, and the cultural politics of energy transition		In the wake of the Paris Agreement on climate change, promises to phase out coal-fired power have suggested cause for optimism around energy transition globally. However, coal remains entangled with contentious development agendas in many parts of the world, while fossil fuel industries continue to flourish. This article discusses these entanglements through a climate justice lens that engages th…	Global Environmental Politics
578	2019	Monasterolo I., Raberto M.	The impact of phasing out fossil fuel subsidies on the low-carbon transition	Distributive effects; Fossil fuel subsidies; Green bonds; Green energy policies; Renewable energy; Stock-Flow Consistency	There is growing consensus on the fact that fossil fuel subsidies provided by governments in high-income countries represent a misalignment on emissions’ reduction with the global climate agenda. In addition, a discussion emerged on the negative socio-economic and environmental externalities associated with fossil fuel subsidies. Nevertheless, pathways for phasing out fossil fuel subsidies in hig…	Energy Policy
579	2019	Ali M.M., Alaallah A.A., Talib S.K.	Green economy challenges and ways to succeed: An arab countries case study	Arabia; Climate crisis; Green economy	Several concurrent crises have either sprung up or accelerated during the last decade: crises in climate, biodiversity, fuel, food, water, and of late in the financial system and the economy as a whole. Accelerating climate-change emissions indicate a mounting threat of runaway climate change, with potentially disastrous human consequences. The fuel price shock of 2008, and a related flare up in …	International Journal of Innovation, Creativity and Change
580	2019	Steneck R.S., Arnold S.N., Boenish R., de León R., Mumby P.J., Rasher D.B., Wilson M.W.	Managing recovery resilience in coral reefs against climate-induced bleaching and hurricanes: A 15 year case study from Bonaire, Dutch Caribbean	Bonaire (Dutch Antilles); Caribbean; Coral bleaching; Coral reefs; Herbivory; Hurricanes; Managed resilience; Resilience	Coral reefs are among the world's most endangered ecosystems. Coral mortality can result from ocean warming or other climate-related events such as coral bleaching and intense hurricanes. While resilient coral reefs can recover from these impacts as has been documented in coral reefs throughout the tropical Indo-Pacific, no similar reef-wide recovery has ever been reported for the Caribbean. Clim…	Frontiers in Marine Science
581	2019	Fuje H.	Fossil fuel subsidy reforms, spatial market integration, and welfare: Evidence from a natural experiment in Ethiopia	Fuel subsidy; Price dispersion; Regression discontinuity design; Welfare	In light of climate change and tight fiscal conditions after the 2008 crises, fuel subsidy reform has become a popular policy. The G20 leaders, in their Pittsburgh, Pennsylvania meeting in 2009, committed to phase out inefficient fuel subsidies. However, little is known about the implications of removing subsidies on food prices and welfare. I study the welfare effects of such reforms through the…	American Journal of Agricultural Economics
582	2019	Orthofer C.L., Huppmann D., Krey V.	South Africa after Paris-fracking its way to the NDCs?	Carbon price; COP 21; Integrated assessment modeling; MESSAGEix; NDC; Scenario analysis	South Africa is facing the triple challenge of (a) fuelling economic development and meeting the growing energy demand; (b) increasing the reliability of the electricity system; and (c) ensuring that domestic greenhouse gas emissions peak no later than 2030 to meet its nationally determined contributions (NDC) under the 2015 Paris Agreement. Recently discovered domestic shale gas reserves are bei…	Frontiers in Energy Research
583	2019	Molocchi A., Recchini E., Tudini A.	Polluter Pays Principle in power production to gradually phase-out fossil fuels in Italy	Air emissions; Climate and energy policy; Environmental taxes; External costs; Polluter pays principle; Power production	The paper provides an analysis of Italian environmental taxes on electricity production and consumption in order to verify their consistency with the Polluters Pays Principle (PPP). The environmental external costs of air emissions generated by Italian thermal power plants are compared to environmental taxes paid by the same plants (fuel excise duties, SO2/NOx tax, ETS and levy on energy producer…	Economics and Policy of Energy and the Environment
584	2019	Martus E.	Russian industry responses to climate change: the case of the metals and mining sector	Climate change; coal; environment; metals and mining industry; Russia; state–business relations	Globally, the metals and mining sector is a major contributor to GHG emissions. Climate change also poses significant challenges for the industry in a number of ways, including risks to infrastructure and equipment, transport routes and the cost of energy supplies. The sector is of particular importance to Russia, and yet very little is known about how the sector positions itself in relation to t…	Climate Policy
585	2019	Oei P.-Y., Mendelevitch R.	Prospects for steam coal exporters in the era of climate policies: a case study of Colombia	Case study; climate policy; Colombia; decarbonization; energy policy; Steam coal market	Continued global action on climate change has major consequences for fossil fuel markets, especially for coal as the most carbon-intensive fuel. This article summarizes current market developments in the most important coal-producing and coal-consuming countries, resulting in a critical qualitative assessment of prospects for future coal exports. Colombia, as the world’s fourth largest exporter, …	Climate Policy
586	2019	Brand C., Anable J., Morton C.	Lifestyle, efficiency and limits: modelling transport energy and emissions using a socio-technical approach	Emissions modelling; Lifestyle change; Socio-technical approach; Transport systems modelling; Transportation energy	It is well-known that societal energy consumption and pollutant emissions from transport are influenced not only by technical efficiency, mode choice and the carbon/pollutant content of energy but also by lifestyle choices and socio-cultural factors. However, only a few attempts have been made to integrate all of these insights into systems models of future transport energy demand or even scenari…	Energy Efficiency
587	2019	de Haan F.J., Rogers B.C.	The Multi-Pattern Approach for systematic analysis of transition pathways	Analysis; Modelling; Multi-pattern approach; Pathways; Sustainability transitions; Urbanwater	Pathways have become a central notion in various areas of research, amongst which are the studies of transitions to sustainability. Though various typologies and concepts are available, a framework for systematic analysis of transition pathways is lacking. We present the Multi-Pattern Approach (MPA) to fill this lacuna and provide a step-by-step manual for its application. The MPA addresses a ran…	Sustainability (Switzerland)
588	2019	Wendling Z.A.	Bridges beyond renewable energy: Decarbonizing the global electricity sector under uncertainty	Bridge fuel; Decarbonization; Expected value of information; Transition pathways	Mitigating global climate change requires decarbonizing the electricity sector, but the optimal strategy for doing so is not obvious. As power plants fueled by coal and petroleum are phased out, other generation technologies must fill the gap. While technically feasible, many low-carbon technologies are currently expensive – though costs may fall with experience. As an alternative, natural gas-fi…	Energy Research and Social Science
589	2019	Pantelaki I., Voutsa D.	Organophosphate flame retardants (OPFRs): A review on analytical methods and occurrence in wastewater and aquatic environment	OPFRs; Sediments; Sludge; Surface water; Wastewater	Nowadays, there is an increasing concern for organophosphate flame retardants (OPFRs) due to high production and use following the phase out and stringent regulation in the use of brominated flame retardants. OPFRs represent a group of compounds with a wide range in their polarity, solubility and persistence. OPFRs are widely used as flame retardants in various consumer products such as textiles,…	Science of the Total Environment
590	2019	(Thanos) Bourtsalas A.C., Seo Y., Tanvir Alam M., Seo Y.-C.	The status of waste management and waste to energy for district heating in South Korea	District heating; Municipal solid waste; S. Korea; Waste composition; Waste-to-energy	This paper focuses on waste management and waste to energy (WTE) for district heating in S. Korea. The chemical formula for the materials disposed of in volume base waste fee (VBWF) bags that are processed in WTE plants was calculated as: C 6 H 9.9 O 2.3 , with a heat of formation of 27.6 MJ/kg. The average heating value for the 35 WTE plants was 9.7 MJ/kg, and the average amount of energy recove…	Waste Management
591	2019	Hölscher K., Frantzeskaki N., Loorbach D.	Steering transformations under climate change: capacities for transformative climate governance and the case of Rotterdam, the Netherlands	Climate change; Governance agency; Governance capacity; Orchestrating capacity; Resilience; Sustainability transformation; Transformative capacity; Transformativeclimate governance; Urban governance	In light of the persistent failure to reduce emissions decisively, facilitate long-term resilience against climate change and account for the connectedness of climate change with other social, environmental and economic concerns, we present a conceptual framework of capacities for transformative climate governance. Transformative climate governance enables climate mitigation and adaptation while …	Regional Environmental Change
592	2019	Sunderland E.M., Hu X.C., Dassuncao C., Tokranov A.K., Wagner C.C., Allen J.G.	A review of the pathways of human exposure to poly- and perfluoroalkyl substances (PFASs) and present understanding of health effects		Here, we review present understanding of sources and trends in human exposure to poly- and perfluoroalkyl substances (PFASs) and epidemiologic evidence for impacts on cancer, immune function, metabolic outcomes, and neurodevelopment. More than 4000 PFASs have been manufactured by humans and hundreds have been detected in environmental samples. Direct exposures due to use in products can be quickl…	Journal of Exposure Science and Environmental Epidemiology
593	2019	Kang S.-C., Lee H.	Economic appraisal of implementing electric vehicle taxis in Seoul	Air pollutant; Economic appraisal; Electric vehicle taxi; Greenhouse gas; Sustainable transport	Global commitments for climate change mitigation and sustainable development have given the electric vehicle renewed attention as a critical building block of sustainable transport. However, the diffusion of electric vehicles has been limited so far. In an effort to facilitate scaled-up deployment of electric vehicles, this paper examines the economic feasibility of replacing the current fleet of…	Research in Transportation Economics
594	2019	Li Y., Chang Q., Duan H., Liu Y., Zhang J., Li J.	Occurrence, levels and profiles of brominated flame retardants in daily-use consumer products on the Chinese market		With the global phasing-out of POP-BFRs (brominated flame retardants restricted under the Stockholm Convention on Persistent Organic Pollutants), the main challenge for their environmentally sound management has shifted from manufacturing and consumption to their recycling and disposal. For the end-of-life products containing POP-BFRs, material recycling and reuse in new articles is the favorite …	Environmental Science: Processes and Impacts
595	2019	Pelkmans L., Van Dael M., Junginger M., Fritsche U.R., Diaz-Chavez R., Nabuurs G.-J., Del Campo Colmenar I., Gonzalez D.S., Rutz D., Janssen R.	Long-term strategies for sustainable biomass imports in European bioenergy markets	biomass; energy policy; lignocellulosic biomass; sustainability; trade; wood pellets	Projections show that biomass will remain important for reaching future EU renewable energy targets. In addition to using domestic biomass, European bioenergy markets will also partly rely on imports of biomass, in particular in trade-oriented EU member states like the United Kingdom, the Netherlands, Belgium, and Denmark. There has been a lot of debate on the sustainability of (imported) biomass…	Biofuels, Bioproducts and Biorefining
596	2019	Meckling J., Nahm J.	The politics of technology bans: Industrial policy competition and green goals for the auto industry	China; Climate policy; Electric vehicles; Internal combustion engine; Technology phaseouts	After decades of failure to reduce greenhouse gas emissions in the transport sector, several jurisdictions have in rapid succession announced future goals to phase out sales of internal combustion engine vehicles. This article argues that these announcements are predominantly a form of political signaling in a green industrial policy competition for alternative transport technologies, notably ele…	Energy Policy
597	2019	Meza C.G., Zuluaga Rodríguez C., D'Aquino C.A., Amado N.B., Rodrigues A., Sauer I.L.	Toward a 100% renewable island: A case study of Ometepe's energy mix	Energy storage; Integrated resource planning; Public electric mobility; Renewable energy islands; Sustainable development	Despite generally having significant renewable energy potential, islands tend to depend on imported fossil fuels with volatile prices. This paper aims to provide technical inputs for reorganizing the energy planning for Ometepe Island. The result of the wind and solar resource assessments indicates wind power densities of 147 W/m2 and 178 W/m2 at elevations of 80 m and 120 m, respectively, and an…	Renewable Energy
598	2019	Streets D.G., Horowitz H.M., Lu Z., Levin L., Thackray C.P., Sunderland E.M.	Global and regional trends in mercury emissions and concentrations, 2010–2015	Concentration trends; Emission trends; Mercury; Minamata Convention; Small-scale gold mining; Source contributions	Mercury (Hg) is a naturally occurring element in the Earth's crust. It can be harmful to human health when released in large quantities and/or converted to the neurotoxicant methyl mercury in aquatic ecosystems. This study analyzes global and regional trends in anthropogenic Hg releases to the atmosphere between 2010 and 2015, as well as the associated trends in modeled and measured Hg concentrat…	Atmospheric Environment
599	2019	Engström R.E., Destouni G., Howells M., Ramaswamy V., Rogner H., Bazilian M.	Cross-scalewater and land impacts of local climate and energy policy-A local Swedish analysis of selected SDG interactions	Climate-land-water-energy nexus; Cross-scale SDG interactions; Decarbonisation pathways; Local climate policy	This paper analyses how local energy and climate actions can affect the use of water and land resources locally, nationally and globally. Each of these resource systems is linked to different Sustainable Development Goals (SDGs); we also explore related SDG interactions. A municipality in Sweden with the ambition of phasing out fossil fuels by year 2030 is used as illustrative case example. The l…	Sustainability (Switzerland)
600	2019	Saini A., Clarke J., Jariyasopit N., Rauert C., Schuster J.K., Halappanavar S., Evans G.J., Su Y., Harner T.	Flame retardants in urban air: A case study in Toronto targeting distinct source sectors	Novel flame retardants; Organophosphate esters; Passive sampling; PBDEs; Source sectors; Urban air	Based on distinct land-use categories, a sampling campaign was carried out at eight locations across Toronto and the Greater Toronto Area in 2016–2017. Source sectors’ dependent patterns of atmospheric concentrations of 9 organophosphate esters (OPEs), 9 polybrominated diphenyl ethers (PBDEs) and 5 novel flame retardants (NFRs) showed dominance of OPEs and PBDEs at highly commercialised urban and…	Environmental Pollution
601	2019	Mielke J.	Signals for 2°C: the influence of policies, market factors and civil society actions on investment decisions for green infrastructure	climate change; green finance; Green infrastructure investment; institutional investors; policy signals	The targets of the Paris Agreement make it necessary to redirect finance flows towards sustainable, low-carbon infrastructures and technologies. Currently, the potential of institutional investors to help finance this transition is widely discussed. Thus, this paper takes a closer look at influence factors for green investment decisions of large European insurance companies. With a mix of qualita…	Journal of Sustainable Finance and Investment
602	2019	Alharbi B.H., Pasha M.J., Al-Shamsi M.A.S.	Metal contamination decrease with new legislation: A decade of metal risk assessment in urban dust	Contamination factor; Heavy metals; Lead phase out; Saudi Arabia; Urban dust	New scientific discoveries for new applications of materials (e.g., metals) lead to extensive industrial use of these materials, which in turn, has significant negative health and environmental impacts. Governments use legislation as a management tool to control the usage of certain materials to lower contamination. This study investigates the level of metal contamination over a period of 12 year…	Journal of Environmental Management
603	2019	Madhavi M., Nuttall W.J.	Coal in the twenty-first century: A climate of change and uncertainty	Climate change; Energy; Public policy	Coal presents a particular set of challenges when balancing energy policy goals. Despite presenting viable solutions to the problems of energy security and global energy poverty, coal struggles, given its greenhouse-gas drawbacks, in a world of increasingly harmful climate change. Notwithstanding the harm caused to the environment, coal remains an expanding low-price route to meeting local energy…	Proceedings of Institution of Civil Engineers: Energy
604	2019	Tanaka K., Cavalett O., Collins W.J., Cherubini F.	Asserting the climate benefits of the coal-to-gas shift across temporal and spatial scales		Reducing CO2 emissions through a shift from coal to natural gas power plants is a key strategy to support pathways for climate stabilization. However, methane leakage in the natural gas supply chain and emissions of a variety of climate forcers call the net benefits of this transition into question. Here, we integrated a life cycle inventory model with multiple global and regional emission metric…	Nature Climate Change
605	2019	Balgobin A., Ramroop Singh N.	Source apportionment and seasonal cancer risk of polycyclic aromatic hydrocarbons of sediments in a multi-use coastal environment containing a Ramsar wetland, for a Caribbean island	Cancer risk; Fish; Industrial; Polycyclic aromatic hydrocarbon; Source apportionment; Urban	Although polycyclic aromatic hydrocarbons (PAHs) are toxic pollutants for which some are known carcinogens, there is limited information on the cancer risk such substances pose to the population via marine sediments, despite a significant part of the world's food supply being derived from the coastal environment. This study was conducted in a heavily industrialized and urbanized coastal area, in …	Science of the Total Environment
606	2019	Li N., Chen W., Rafaj P., Kiesewetter G., Schöpp W., Wang H., Zhang H., Krey V., Riahi K.	Air Quality Improvement Co-benefits of Low-Carbon Pathways toward Well below the 2 °c Climate Target in China		This research links the Integrated MARKAL-EFOM system model of China (China TIMES) and the Greenhouse Gas and Air Pollution Interactions and Synergies model (GAINS) to assess the co-benefits of air quality improvement under the Nationally Determined Contribution (NDC) and the well below 2 °C (WBD2) target. Results show that the industry sector and power sector are the key sources necessary to red…	Environmental Science and Technology
607	2019	Coulomb R., Lecuyer O., Vogt-Schilb A.	Optimal Transition from Coal to Gas and Renewable Power Under Capacity Constraints and Adjustment Costs	Climate change mitigation; Early-scrapping; Fossil fuels; Low-carbon investment; Renewables; Resource extraction	Given a cap on carbon emissions, what is the optimal transition from coal to gas and renewable energy? To answer this question, we model the dependence of the energy sector on both (1) polluting exhaustible resources and (2) long-lived capital such as power plants. To minimise adjustment costs, optimal investments in expensive renewable energy start before phasing out fossil-fuel consumption, and…	Environmental and Resource Economics
608	2019	Lehotský L., Černoch F., Osička J., Ocelík P.	When climate change is missing: Media discourse on coal mining in the Czech Republic	Agenda setting; Coal mining; Czech Republic; Decarbonization; Discourse; Media	One of the EU's main decarbonization goals is a reduction in the energy use of coal. It would be a mistake, however, to assume that public support for decarbonization can be gained automatically by pointing out threats from climate change, particularly in light of the role coal plays in the local and national economy and in energy security. In this article we search for factors affecting public s…	Energy Policy
609	2019	Donley N.	The USA lags behind other agricultural nations in banning harmful pesticides	Agriculture; Environmental Protection Agency; Pesticide; Regulation	Background: The United States of America (USA), European Union (EU), Brazil and China are four of the largest agricultural producers and users of agricultural pesticides in the world. Comparing the inclination and ability of different regulatory agencies to ban or eliminate pesticides that have the most potential for harm to humans and the environment can provide a glimpse into the effectiveness …	Environmental Health: A Global Access Science Source
610	2019	Zhou C., Pagano J., McGoldrick D.J., Chen D., Crimmins B.S., Hopke P.K., Milligan M.S., Murphy E.W., Holsen T.M.	Legacy Polybrominated Diphenyl Ethers (PBDEs) Trends in Top Predator Fish of the Laurentian Great Lakes (GL) from 1979 to 2016: Will Concentrations Continue to Decrease?		Polybrominated diphenyl ethers (PBDEs) were widely used as fire retardants and have been detected throughout the Great Lakes (GL) ecosystem. The concentration trends (after fish age normalization) of PBDEs in top predator fish (lake trout and walleye) of the GLs were determined from 1979 to 2016, which includes most of the period when PBDEs were manufactured and used in this region. The fish samp…	Environmental Science and Technology
611	2019	Moriarty P., Honnery D.	Prospects for hydrogen as a transport fuel	Electric vehicles; Freight transport; Hydrogen fuel cell vehicles; Passenger transport; Renewable energy	Early forecasts for hydrogen's role in transport usually proved over-optimistic, with several seeing hydrogen as an important transport fuel by year 2010 or even much earlier. Over the past century, vehicular passenger transport has experienced hypergrowth in terms of task, energy use and greenhouse gas emissions. For a variety of reasons, future decades may well see a significantly reduced globa…	International Journal of Hydrogen Energy
612	2019	Wong Y.K., Huang X.H.H., Cheng Y.Y., Louie P.K.K., Yu A.L.C., Tang A.W.Y., Chan D.H.L., Yu J.Z.	Estimating contributions of vehicular emissions to PM 2.5 in a roadside environment: A multiple approach study	EC-tracer method; PM 2.5; Receptor model; Source apportionment; Vehicular emissions	Vehicular emissions (VE) are among the major sources of airborne fine particulate matter (PM 2.5 ) in urban atmospheres, which adversely impact the environment and public health. Receptor models are widely used for estimating PM 2.5 source contributions from VE (PM vehicle ), but often give inconsistent results due to different modelling principles and assumptions. During December 2015–May 2017, …	Science of the Total Environment
613	2019	Ahn Y.-H., Jeon W.	Power sector reform and CO2 abatement costs in Korea	Carbon price; Fuel switching; Marginal abatement cost curve; Power sector; Renewable energy	The current Korean administration is driving change in the power sector by gradually phasing out nuclear power plants, expanding the use of renewable energy, and imposing restrictions on the operation of coal power plants. Considering these changes, the marginal abatement cost (MAC) curve would provide crucial information to determine an appropriate greenhouse gas reduction target, especially for…	Energy Policy
614	2019	Tavana A., Emami Javid A., Houshfar E., Mahmoudzadeh Andwari A., Ashjaee M., Shoaee S., Maghmoomi A., Marashi F.	Toward renewable and sustainable energies perspective in Iran	Investment opportunities; Power generation; Renewable energy; Solar energy; Waste to energy; Wind energy	This paper investigates the potential of renewable energies utilization in detail through three in-house developed strategies to increase the renewable power generation share until the year 2050 assuming either an optimistic 100% or a practical 50% based on the national policies. Solar, wind, and waste energy are the most feasible alternative energy resources in Iran. In the first strategy, power…	Renewable Energy
615	2019	Gewurtz S.B., Bradley L.E., Backus S., Dove A., McGoldrick D., Hung H., Dryfhout-Clark H.	Perfluoroalkyl Acids in Great Lakes Precipitation and Surface Water (2006-2018) Indicate Response to Phase-outs, Regulatory Action, and Variability in Fate and Transport Processes		The concentrations of perfluoroalkyl acids (PFAAs) were determined in precipitation from three locations across the Great Lakes between 2006 and 2018 and compared to those in surface water. Perfluorooctane sulfonate (PFOS) and perfluorooctanoate (PFOA) concentrations generally decreased in precipitation, likely in response to phase-outs/regulatory actions. In comparison, concentrations of shorter…	Environmental Science and Technology
616	2019	Long W.-J., Li H.-D., Ma H., Fang Y., Xing F.	Green alkali-activated mortar: Sustainable use of discarded cathode-ray tube glass powder as precursor	Alkali-activated slag (AAS); Alkali-silica reaction (ASR); Discarded cathode ray tubes (CRT)glass powder; Lead leaching; Pozzonlanic activity	With technological development, the cathode-ray tubes (CRTs) are being phased out and discarded. However, the discarded CRT is non-degradable, and the presence of lead in it may cause serious contamination to soil and water resources. As a sustainable method to recycle discarded CRT glass, we tested the discarded CRT glass powder (CGP)at up to 70% substitution by mass in alkali-activated slag (AA…	Journal of Cleaner Production
617	2019	Gawlik L., Mokrzycki E.	Changes in the structure of electricity generation in Poland in view of the EU climate package	Energy mix; Energy policy; Energy security	The fuel mix of electricity generation in Poland is currently based predominantly on solid fuels. In addition, the generation power base is outdated. Many of the generating units are inefficient, uneconomic, and do not comply ecological standards, so they should be withdrawn from use in the near future. Poland, which consumes approximately 170 TWh of electricity, needs to determine the direction …	Energies
618	2019	Trencher G., Healy N., Hasegawa K., Asuka J.	Discursive resistance to phasing out coal-fired electricity: Narratives in Japan's coal regime	Coal; Energy transition; Fossil fuel regimes; Fossil fuels phase-out; Japanese energy policy; Narratives	Achieving temperature targets under the Paris Agreement requires urgent measures to curb construction of coal-fired power plants (CFPPs) and expediate the retirement of existing assets. As the world's fourth largest coal consumer, Japan's efforts to reduce coal usage are critical for international climate mitigation. Policies introduced after the Fukushima nuclear disaster have led to a rapid inc…	Energy Policy
619	2019	Rentier G., Lelieveldt H., Kramer G.J.	Varieties of coal-fired power phase-out across Europe	Carbon lock-in; Coal; Energy transition; Institutional lock-in	Meeting climate goals is a particular challenge for countries that combine extensive use of coal as a fuel for power generation with a significant history of coal mining. We argue that these countries are prone to institutional carbon lock-in processes that significantly affect the phase-out of the use of coal. We use the analytical framework of Varieties of Capitalism to compare degrees of carbo…	Energy Policy
[truncated: 251 more rows]

## Sheet: B Coding results
ID	C (A)	C (B)	C (C)	T (A)	T (B)	T (C)	T (D)	T (E)	D (A)	D (B)	D (C)	D (D)	D (E)	D (F)	D (G)	I (A)	I (B)	I (C)	I (D)	I (E)	I (F)	G (A)	G (B)	G (C)	G (D)	G (E)	G (F)	P (A)	P (B)	P (C)	P (D)	P (E)	P (F)
1	2	0	0	79	0	0	0	0	5	0	0	0	0	0	0	3	0	0	0	0	0	21	0	0	0	0	0	11	0	0	0	0	0
2	1	0	0	36	0	0	0	0	2	19	0	0	0	0	0	0	0	0	0	0	0	22	0	0	0	0	0	0	0	0	0	0	0
3	3	0	0	109	0	0	0	0	2	0	0	0	0	0	0	12	0	0	0	0	0	21	0	0	0	0	0	21	0	0	0	0	0
4	1	0	0	19	0	0	0	0	0	0	0	0	0	0	0	2	0	0	0	0	0	21	0	0	0	0	0	22	0	0	0	0	0
5	3	0	0	116	0	0	0	0	3	0	0	0	0	0	0	13	2	0	0	0	0	1	0	0	0	0	0	7	0	0	0	0	0
[truncated: 865 more rows]

## Sheet: C Codebook
C | Phase-out target (class)	Code		T | Phase-out target (specific)	Code		D | Driver	Code		I | Affected industry	Code		P | Policy	Code		G | Geography	Code
[truncated: 116 more rows]
