# Supplementary material for: Mapping the contours of an emerging phase out science
Source: Research Square preprint supplement (doi:10.21203/rs.3.rs-1348121/v1), 2022-03-07
Supplement: Supplementary file 4 [file e4dead0d210c2c0d3f945040.xlsx]

## Sheet: 1 Inventory of Targets
Phase-out target (specific)
Substances	Count	Code
Ozone depleting substances (unspecified or in general)	59	1
Ozone depleting substances: CFC	38	2
Ozone depleting substances: HCFC	10	3
Ozone depleting substances: HCFC-22	5	4
Ozone depleting substances: methyl chloroform	4	5
Ozone depleting substances: Halons	4	6
Ozone depleting substances: halocarbons	2	7
Ozone depleting substances: Carbon tetrachloride	2	8
Ozone depleting substances: tetrafluoroethane (C2H2F4)	1	9
Methyl bromide	29	10
Fossil fuels (coal): extraction	20	11
Fossil fuels (coal): general	18	12
Fossil fuels (general)	40	13
Fossil fuels (general): extraction	6	14
Fossil fuels (oil): transport	5	15
Fossil fuels (oil): transport (air)	1	16
Fossil fuels (subsidies)	33	17
Fossil fuels (gas): general	1	18
Lead: gasoline	35	19
Lead: general or multiple sources	6	20
Lead: shot	6	21
Lead: wheel weights	1	22
Flame retardants	42	23
Perfluorinated compounds	40	24
Agrochemicals (general): unspecified	3	25
Agrochemicals (herbicides): unspecified	2	26
Agrochemicals (pesticides): azinphos-methyl	1	27
Agrochemicals (pesticides): carbamate	2	28
Agrochemicals (pesticides): Chlorpyrifos	1	29
Agrochemicals (pesticides): DDT	1	30
Agrochemicals (pesticides): dichlorvos	1	31
Agrochemicals (pesticides): endosulfan	1	32
Agrochemicals (pesticides): malathion	1	33
Agrochemicals (pesticides): nematicides	1	34
Agrochemicals (pesticides): organochlorine	5	35
Agrochemicals (pesticides): organophosphate	6	36
Agrochemicals (pesticides): unspecified	8	37
Agrochemicals: chlormequat chloride	1	38
Agrochemicals: fertilizers	1	39
Agrochemicals: soil fumigants	3	40
Agrochemicals: antibiotics	1	41
Arsenic: general	1	42
Arsenic: livestock feed additives	1	43
Arsenic: wood preservative	1	44
Mercury: tooth fillings	2	45
Mercury: pesticides	1	46
Mercury: general	15	47
Emissions (CO2/GHGs)	16	48
Emissions (aerosols)	1	49
Plastics: microbeads	2	50
Plastics: foam buoys	1	51
Plastics: general	1	52
Plastics: agricultural mulch films	1	53
Plastics: chemical additives	4	54
Nickel	1	55
Cadmium	5	56
Chromium	2	57
MTBE: in gasoline	5	58
Marine paints	4	59
Chlorine bleaching	2	60
Other (conventional rubber)	1	61
Other (dark-colored roofs)	1	62
Other (peat)	1	63
Other (pharmaceuticals): carbamazepine	1	64
Halogenated chemicals	1	65
Organic solvents	1	66
DDT	1	67
PVC	1	68
Unspecified chemicals	19	69
Bisphenol A (BPA)	2	70
Nonylphenol polyethoxylates	2	71
Persistant organic pollutants (POPs): unspecified	4	72
Polychlorinated biphenyls (PCBs)	4	73
Organic rankine cycle fluid	1	74
Technology	Count	Code
Nuclear	113	75
Fossil fuels (coal): power	76	76
Fossil fuels (coal): technologies	4	77
Fossil fuels (coal): technologies (heating)	1	78
Fossil fuels (general): power	28	79
Fossil fuels (general): infrastructure	4	80
Fossil fuels (general): heating systems	6	81
Fossil fuels (oil): technologies	3	82
Fossil fuels (gas): power	2	83
Fossil fuels (oil): heating fuels	1	84
Fossil fuels (oil): general	1	85
Fossil fuels (oil): power	4	86
Fossil fuels (oil/gas): technologies (ICEs)	15	87
Light bulbs	11	88
Single hulled tankers	7	89
Mercury: technologies	4	90
Lead: cathode ray tubes	3	91
Polychlorinated biphenyls (PCBs): technologies	3	92
Cement technology	2	93
Biomass: technologies	1	94
Other (geoengineering): cloud seeding	1	95
Blast furnace (iron and steel making)	1	96
Passenger cars	1	97
Processes	Count	Code
Agricultural practices: biomass burning	4	98
Agricultural practices: conventional practices	1	99
Agricultural practices: GMOs	1	100
Agricultural practices: grazing	1	101
Agricultural practices: greenhouses	1	102
Agricultural practices: poultry cages	3	103
Agricultural practices: Slash and burn	1	104
Agricultural practices: using manure/straw	1	105
Waste disposal: incineration	1	106
Waste disposal: Land application sewerage sludge	1	107
Waste disposal: Landfilling	1	108
Waste disposal: ocean dumping	4	109
Waste disposal: plastic incineration	1	110
Waste disposal: water	1	111
Fishing/fishing practices	7	112
Biofuels	6	113
Logging/forestry	3	114
Ballast discharge	2	115
Other	Count	Code
Industries: carbon intensive	7	116
Industries: other	1	116
Industries: polluting	6	116
Other	21	116
Policy or policy feature: other	7	116
Policy or policy feature: subsidies	3	116
Inefficient heavy manufacturing technologies	1	116

## Sheet: 2 Aggregation of Targets
Phase-out target (aggregated)	Phase-out target (specific) A	Phase-out target (specific) B	Phase-out target (specific) C	Phase-out target (specific) D	Phase-out target (specific) E	Phase-out target (specific) F	Phase-out target (specific) G	Phase-out target (specific) H	Phase-out target (specific) I	Phase-out target (specific) J	Phase-out target (specific) K	Phase-out target (specific) L	Phase-out target (specific) M	Phase-out target (specific) N	Phase-out target (specific) O	Phase-out target (specific) P	Phase-out target (specific) Q	Phase-out target (specific) R	Phase-out target (specific) S	Phase-out target (specific) T
Ozone depleting substances	Ozone depleting substances (unspecified or in general)	Ozone depleting substances: CFC	Ozone depleting substances: HCFC	Ozone depleting substances: HCFC-22	Ozone depleting substances: methyl chloroform	Ozone depleting substances: Halons	Ozone depleting substances: halocarbons	Ozone depleting substances: Carbon tetrachloride	Ozone depleting substances: tetrafluoroethane (C2H2F4)	Methyl bromide
Fossil fuels	Fossil fuels (coal): extraction	Fossil fuels (coal): general	Fossil fuels (general)	Fossil fuels (general): extraction	Fossil fuels (oil): transport	Fossil fuels (oil): transport (air)	Fossil fuels (subsidies)	Fossil fuels (gas): general
Lead	Lead: gasoline	Lead: general or multiple sources	Lead: shot	Lead: wheel weights
Flame retardants	Flame retardants
Perfluorinated compounds	Perfluorinated compounds
Agrochemicals	Agrochemicals (general): unspecified	Agrochemicals (herbicides): unspecified	Agrochemicals (pesticides): azinphos-methyl	Agrochemicals (pesticides): carbamate	Agrochemicals (pesticides): Chlorpyrifos	Agrochemicals (pesticides): DDT	Agrochemicals (pesticides): dichlorvos	Agrochemicals (pesticides): endosulfan	Agrochemicals (pesticides): malathion	Agrochemicals (pesticides): nematicides	Agrochemicals (pesticides): organochlorine	Agrochemicals (pesticides): organophosphate	Agrochemicals (pesticides): unspecified	Agrochemicals: chlormequat chloride	Agrochemicals: fertilizers	Agrochemicals: soil fumigants	Agrochemicals: antibiotics
Arsenic	Arsenic: general	Arsenic: livestock feed additives	Arsenic: wood preservative
Mercury	Mercury: tooth fillings	Mercury: pesticides	Mercury: general
Aerial emissions	Emissions (CO2/GHGs)	Emissions (aerosols)
Plastics	Plastics: microbeads	Plastics: foam buoys	Plastics: general	Plastics: agricultural mulch films	Plastics: chemical additives
Other substances	Nickel	Cadmium	Chromium	MTBE: in gasoline	Marine paints	Chlorine bleaching	Other (conventional rubber)	Other (dark-colored roofs)	Other (peat)	Other (pharmaceuticals): carbamazepine	Halogenated chemicals	Organic solvents	Vector controls: DDT	PVC	Unspecified chemicals	Bisphenol A (BPA)	Nonylphenol polyethoxylates	Persistant organic pollutants (POPs): unspecified	Polychlorinated biphenyls (PCBs)	Organic rankine cycle fluid
Nuclear power	Nuclear
Fossil fuels (Coal technologies)	Fossil fuels (coal): power	Fossil fuels (coal): technologies	Fossil fuels (coal): technologies (heating)
Other fossil fuel technologies & infrastructures	Fossil fuels (general): power	Fossil fuels (general): infrastructure	Fossil fuels (general): heating systems	Fossil fuels (oil): technologies	Fossil fuels (gas): power	Fossil fuels (oil): heating fuels	Fossil fuels (oil): general	Fossil fuels (oil): power
Internal combustion engines	Fossil fuels (oil/gas): technologies (ICEs)
Other technologies	Light bulbs	Single hulled tankers	Mercury: technologies	Lead: cathode ray tubes	Polychlorinated biphenyls (PCBs): technologies	Cement technology	Biomass: technologies	Other (geoengineering): cloud seeding	Blast furnace (iron and steel making)	Passenger cars
Agricultural practices	Agricultural practices: biomass burning	Agricultural practices: conventional practices	Agricultural practices: GMOs	Agricultural practices: grazing	Agricultural practices: greenhouses	Agricultural practices: poultry cages	Agricultural practices: Slash and burn	Agricultural practices: using manure/straw
Waste disposal	Waste disposal: incineration	Waste disposal: Land application sewerage sludge	Waste disposal: Landfilling	Waste disposal: ocean dumping	Waste disposal: plastic incineration	Waste disposal: water
Fishing/fishing practices	Fishing/fishing practices
Biofuels	Biofuels
Other processes	Logging/forestry	Ballast discharge
Other	Other	Policy or policy feature: other	Policy or policy feature: subsidies	Industries: carbon intensive	Industries: other	Industries: polluting

## Sheet: 3 Classification of Industries
Affected industry sectors (see comment)
Agriculture, Forestry, Fishing and Hunting	Count
11 Agriculture, Forestry, Fishing and Hunting	1
111 Crop Production	35
111120 Oilseed (except Soybean) Farming	1
111130 Dry Pea and Bean Farming	2
111150 Corn Farming	1
111160 Rice Farming	2
11121 Vegetable and Melon Farming	11
1113 Fruit and Tree Nut Farming	6
111333 Strawberry Farming	1
1114 Greenhouse, Nursery, and Floriculture Production	2
11141 Food Crops Grown Under Cover	1
1119 Other Crop Farming	2
111930 Sugarcane Farming	3
112 Animal Production*	3
112210 Hog and Pig Farming	1
1123 Poultry and Egg Production	3
112310 Chicken Egg Production	1
11251 Aquaculture	2
113 Forestry and Logging	3
113110 Forestry: timber cultivation*	2
11411 Fishing	9
11421 Hunting and Trapping	2
114210 Hunting and Trapping	4
11511 Support Activities for Crop Production	1
115310 Forestry: Firefighting*	1
Pan-sector: Agriculture	3
Fossil fuel extraction, refining and supply	Count
211 Oil and Gas Extraction	5
211120 Fossil fuel extraction: gas*	1
211120 Fossil fuel extraction: oil*	10
211130 Fossil fuel extraction: gas*	4
21211 Fossil fuel extraction: coal*	32
213112 Fossil fuel extraction: oil/gas (exploration)*	1
213113 Fossil fuel extraction: coal (exploration)*	1
Pan-sector: Fossil Fuel (General) Extraction	5
324110 Petroleum Refineries	15
32419 Other Petroleum and Coal Products Manufacturing	2
486910 Pipeline Transportation of Refined Petroleum Products	1
447 Gasoline Stations	1
Pan-sector: Fossil Fuel (Coal)	4
Pan-sector: Fossil Fuel (General)	3
Pan-sector: Fossil Fuel (Oil)	4
423520 Coal Trading*	1
424710 Petroleum Bulk Stations and Terminals	1
Power generation	Count
22111 Electric Power Generation	3
22111 Power Generation: all*	5
221112 Power Generation: fossil fuel (coal)*	91
221112 Power Generation: fossil fuel (gas)*	5
221112 Power Generation: fossil fuel (oil)*	4
221112 Power Generation: fossil fuel*	30
221113 Power Generation: nuclear*	113
Utilities (water, sewerage, heating, cooling)	Count
2213 Water, Sewage and Other Systems	1
221310 Water Supply and Irrigation Systems	1
221320 Sewage Treatment Facilities	7
221330 District Heat and Cooling*	6
Construction	Count
236 Construction of Buildings	3
23611 Residential Building Construction	2
2362 Nonresidential Building Construction	3
237 Heavy and Civil Engineering Construction	1
237310 Highway, Street, and Bridge Construction	1
237990 Other Heavy and Civil Engineering Construction	1
23811 Poured Concrete Foundation and Structure Contractors	1
Consumer goods manufacturing	Count
311 Food Manufacturing	2
3112 Grain and Oilseed Milling	2
312230 Tobacco Manufacturing	1
313 Textile Mills	4
313310 Textile and Fabric Finishing Mills	1
314 Textile Product Mills	1
315 Apparel Manufacturing	3
321 Wood Product Manufacturing	1
32111 Sawmills and Wood Preservation	1
321114 Wood Preservation	1
3221 Pulp, Paper, and Paperboard Mills	2
322219 Other Paperboard Container Manufacturing	1
337 Furniture and Related Product Manufacturing	3
Pan-sector: Consumer Goods	15
Chemical manufacturing	Count
325 Chemical Manufacturing	9
325120 Industrial Gas Manufacturing	31
325180 Other Basic Inorganic Chemical Manufacturing	3
325193 Ethyl Alcohol Manufacturing	1
325211 Plastics Material and Resin Manufacturing	7
325212 Synthetic Rubber Manufacturing	1
325320 Pesticide and Other Agricultural Chemical Manufacturing	12
32541 Pharmaceutical and Medicine Manufacturing	5
325510 Paint and Coating Manufacturing	3
3256 Soap, Cleaning Compound, and Toilet Preparation Manufacturing	3
32561 Soap and Other Detergent Manufacturing	1
3259 Other Chemical Product and Preparation Manufacturing	1
325998 All Other Miscellaneous Chemical Product and Preparation Manufacturing	42
326140 Plastic Foam Manufacturing*	5
326140 Polystyrene Foam Product Manufacturing	1
326199 All Other Plastics Product Manufacturing	1
Transportation manufacturing	Count
3361 Motor Vehicle Manufacturing	2
336111 Automobile Manufacturing	17
336411 Aircraft Manufacturing	1
33661 Ship and Boat Building	1
336611 Ship Building and Repairing	1
Electronics & electrical equipment manufacturing	Count
334 Computer and Electronic Product Manufacturing	5
33441 Semiconductor and Other Electronic Component Manufacturing	2
334519 Other Measuring and Controlling Device Manufacturing	1
335 Electrical Equipment, Appliance, and Component Manufacturing	1
335110 Electric Lamp Bulb and Part Manufacturing	2
335220 Major Household Appliance Manufacturing	4
335313 Switchgear and Switchboard Apparatus Manufacturing	1
33591 Battery Manufacturing	2
Pan-sector: Electronics	6
Pan-sector: Lighting	3
Machinery, mineral and metal manufacturing	Count
3273 Cement and Concrete Product Manufacturing	5
331 Primary Metal Manufacturing	1
331110 Iron and Steel Mills and Ferroalloy Manufacturing	4
33131 Alumina and Aluminum Production and Processing	1
332215 Metal Kitchen Cookware, Utensil, Cutlery, and Flatware (except Precious) Manufacturing	1
33281 Metal coating and finishing*	1
332992 Small Arms Ammunition Manufacturing	1
33324 Industrial Machinery Manufacturing	1
333241 Food Product Machinery Manufacturing	1
333414 Heating Equipment (except Warm Air Furnaces) Manufacturing	1
333618 Other Engine Equipment Manufacturing	2
Heating, cooling and ventilation manufacturing	Count
Ventilation, Heating, Air-Conditioning, and Refrigeration Manufacturing*	39
Pan-sector: Refrigeration	3
Pan-sector: Heating	5
Pan-sector: Air-Conditioning	1
Waste management	Count
562 Waste Management and Remediation Services	8
56221 Waste Treatment and Disposal	14
562212 Solid Waste Landfill	2
562213 Solid Waste Combustors and Incinerators	2
562920 Materials Recovery Facilities	7
Transport operation	Count
481 Air Transportation	3
483 Water Transportation	2
483111 Deep Sea Freight Transportation	9
483112 Deep Sea Passenger Transportation	2
485 Passenger Transportation (road)*	4
48811 Airport Operations	1
Pan-sector: Transport (General)	4
Pan-sector: Transport (Road)	14
Other	Count
212 Mining (except Oil and Gas)	1
212221 Gold Ore Mining	5
212299 All Other Metal Ore Mining	1
21239 Other Nonmetallic Mineral Mining and Quarrying	1
33911 Medical Equipment and Supplies Manufacturing	3
424910 Farm Supplies Merchant Wholesalers	1
424930 Flower, Nursery Stock, and Florists' Supplies Merchant Wholesalers	2
4481 Clothing Stores	1
451110 Sporting Goods Stores	2
452 General Merchandise Stores	1
561710 Exterminating and Pest Control Services	3
611110 Elementary and Secondary Schools	1
621210 Offices of Dentists	4
622 Hospitals	2
713930 Marinas	2
713990 Recreation Industries (Clay Target Shooting)*	2
72111 Hotels and Motels*	1
72251 Restaurants and Other Eating Places	1
922160 Fire Protection	2
926140 Quarantine Services*	3
928110 National Security	3
Pan-sector: Bioenergy	3
Pan-sector: Food	2
Pan-sector: Health Care & Medical	1
Pan-sector: Nuclear	4
Unspecified (Energy System)	15
